# Supplementary material for: Metal–metal cooperativity boosts Lewis basicity and reduction properties of the bis(gallanediyl) CyL2Ga2
Source: Royal Society of Chemistry journal article supplement (doi:10.1039/d4dt00172a), 2024-01-01
Supplement: d4dt00172a1.pdf [file d4dt00172a1.pdf]

## Supporting Information

### **Metal–metal cooperativity boosts Lewis basicity and reduction properties of the bis(gallanediyI) $CyL_2Ga_2$**

*Christoph Helling,<sup>a,e</sup> Lotta Döhler,<sup>c</sup> Oleksandr Kysliak,<sup>c</sup> Helmar Görls,<sup>c</sup> Phil Liebing,<sup>c</sup> Christoph Wölper,<sup>a</sup> Robert Kretschmer<sup>\*c,d</sup>, and Stephan Schulz<sup>\*a,b</sup>*

<sup>a</sup>Institute of Inorganic Chemistry, University of Duisburg-Essen, 45117 Essen, Germany

<sup>b</sup>Center for Nanointegration Duisburg-Essen (CENIDE), University of Duisburg-Essen, 45117 Essen, Germany

<sup>c</sup>Institute of Inorganic and Analytical Chemistry (IAAC), Friedrich Schiller University Jena, 07743 Jena, Germany

<sup>d</sup>Jena Center for Soft Matter (JCSM), Friedrich Schiller University Jena, 07743 Jena, Germany

<sup>e</sup>Current address: School of Chemistry, Monash University, PO Box 23, Melbourne, VIC, 3800, Australia

## **Content**

### **I. Spectroscopic Characterization**

**Figures S1 – S4.** In situ  $^1\text{H}$ ,  $^{13}\text{C}\{^1\text{H}\}$ ,  $^{11}\text{B}$  and  $^{19}\text{F}$  NMR spectra of **1–B**.

**Figures S5 – S8.**  $^1\text{H}$ ,  $^{13}\text{C}\{^1\text{H}\}$ ,  $^{19}\text{F}$  NMR and IR spectra of **1–Al**.

**Figures S9 – S11.**  $^1\text{H}$ ,  $^{13}\text{C}\{^1\text{H}\}$ , and IR spectra of **1–Cl<sub>2</sub>**.

**Figures S12 – 14.**  $^1\text{H}$ ,  $^{13}\text{C}\{^1\text{H}\}$ , and IR spectra of **1–I<sub>2</sub>**.

**Figures S15 – S17.**  $^1\text{H}$ ,  $^{13}\text{C}\{^1\text{H}\}$ , and IR spectra of **2–(TEMPO)<sub>2</sub>**.

**Figure S18.** IR spectrum of **1–(TEMPO)<sub>4</sub>**.

**Figure S19.** Cross-over experiment between  $^{\text{Cv}}\text{L}_2\text{Ga}_2$  and  $\text{LGa–B}(\text{C}_6\text{F}_5)_3$ .

**Figure S20.** Cross-over experiment between  $^{\text{Cv}}\text{L}_2\text{Ga}_2$  and  $\text{LGa–Al}(\text{C}_6\text{F}_5)_3$ .

**Figure S21.** Cross-over experiment between  $^{\text{Cv}}\text{L}_2\text{Ga}_2$  and  $\text{LGaCl}_2$ .

**Figure S22.** Cross-over experiment between  $^{\text{Cv}}\text{L}_2\text{Ga}_2$  and  $\text{LGaI}_2$ .

### **II. Single-Crystal X-ray Diffraction**

**Table S1.** Crystallographic details of **1–Al**, **1–Cl<sub>2</sub>** and **1–I<sub>2</sub>**.

**Table S2.** Crystallographic details of **1–(TEMPO)<sub>4</sub>**, **2–(TEMPO)<sub>2</sub>** and **S1**.

**Figure S27.** Molecular structure of **1–Cl<sub>2</sub>**.

**Figure S28.** Molecular structure of **S1**.

**Figure S29.** Molecular structure of **1–I<sub>2</sub>**.

**Figure S30.** Molecular structure of **2–(TEMPO)<sub>2</sub>**.

**Figure S31.** Molecular structure of **1–(TEMPO)<sub>4</sub>**.

### **III. Computational Details**

**Figure S32.** a) Potential-energy surface for the reaction of **1** with **2–B** and b) related transition state structure (hydrogen atoms are omitted for clarity calculated at the BP86(D3-BJ)/def2SVP level of theory.

**Figure S33.** Local minima on the potential-energy surface *en route*  $\mathbf{1} + \mathbf{2-X}_2 \rightarrow \mathbf{1-X}_2 + \mathbf{2}$  calculated at the BP86(D3-BJ)/def2SVP level of theory.

**Figure S34.** Bimetallic complex **1** and its isomer **1'** comprising an intramolecular donor-acceptor interaction along with corresponding relative energies.<sup>[1]</sup>

### **IV. XYZ Coordinates**

## I. Spectroscopic Characterization

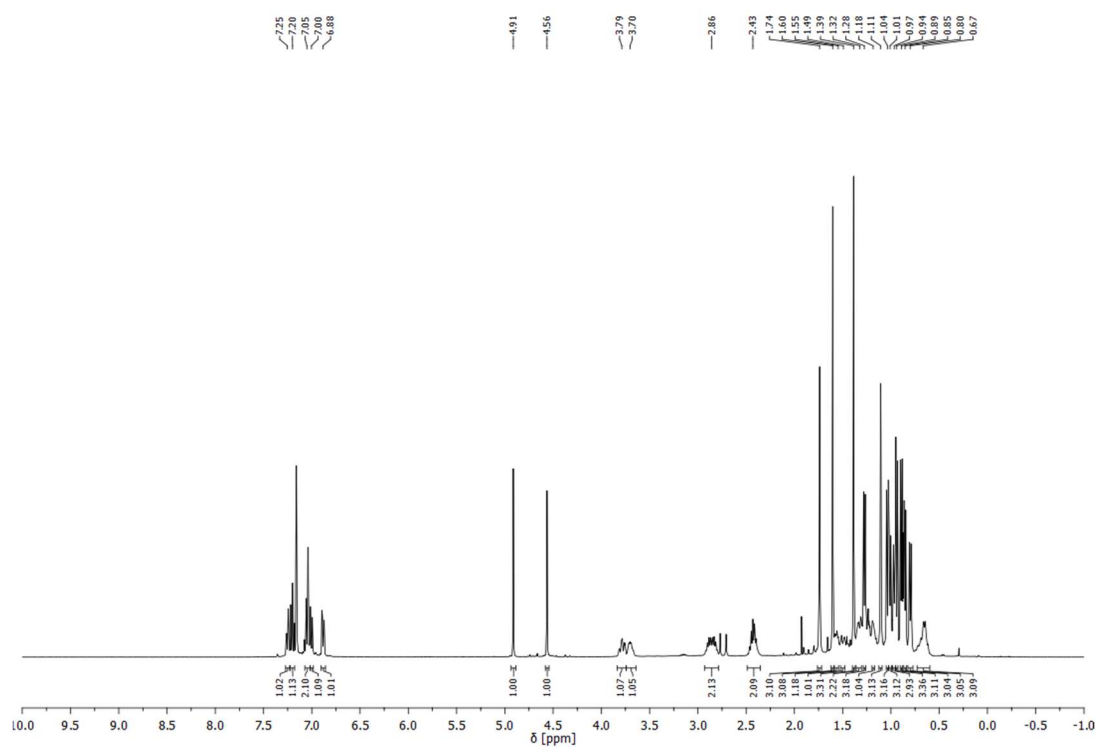

Figure S1.  $^1\text{H}$  NMR spectrum (400.1 MHz,  $\text{C}_6\text{D}_6$ ) of  $\text{CyL}_2\text{Ga}_2\text{-B}(\text{C}_6\text{F}_5)_3$  (**1-B**).

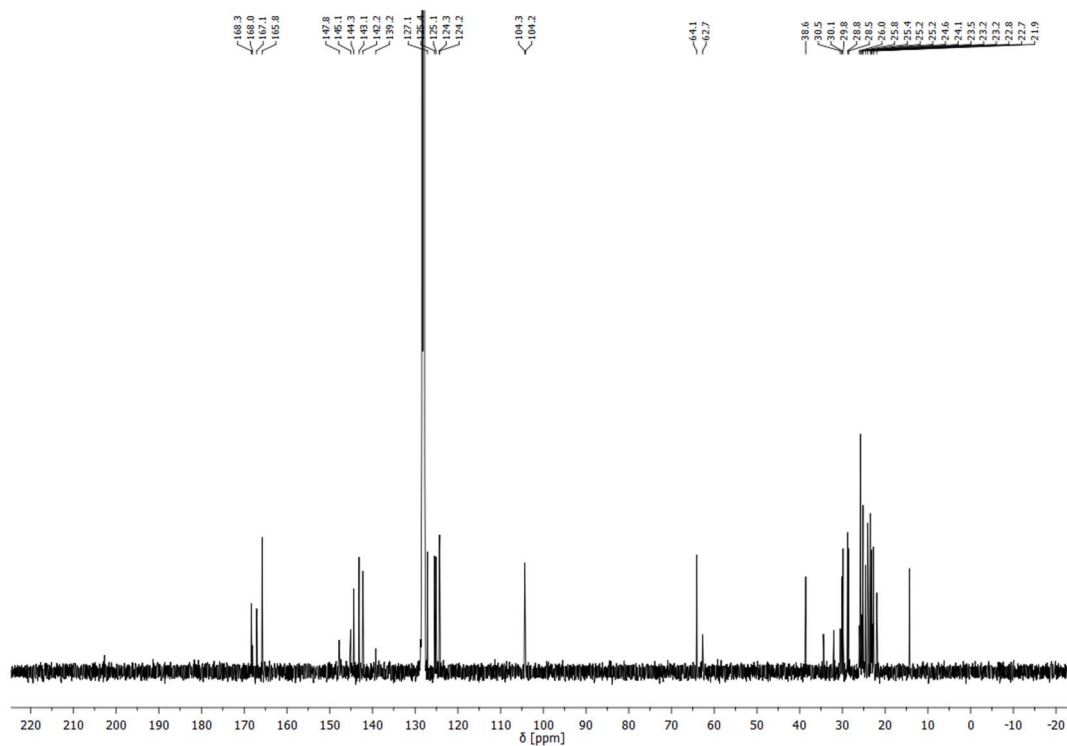

Figure S2.  $^{13}\text{C}\{^1\text{H}\}$  NMR spectrum (100.6 MHz,  $\text{C}_6\text{D}_6$ ) of  $\text{CyL}_2\text{Ga}_2\text{-B}(\text{C}_6\text{F}_5)_3$  (**1-B**).

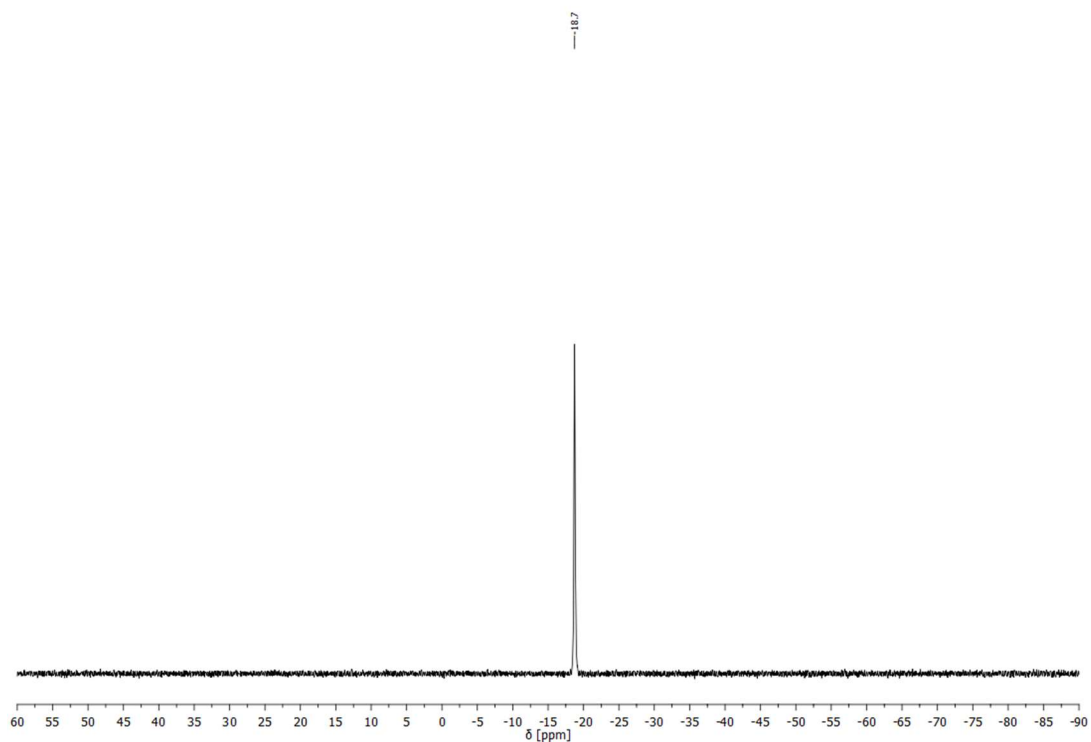

**Figure S3.**  $^{11}\text{B}$  NMR spectrum (128.4 MHz,  $\text{C}_6\text{D}_6$ ) of  $\text{CyL}_2\text{Ga}_2\text{-B}(\text{C}_6\text{F}_5)_3$  (**1-B**).

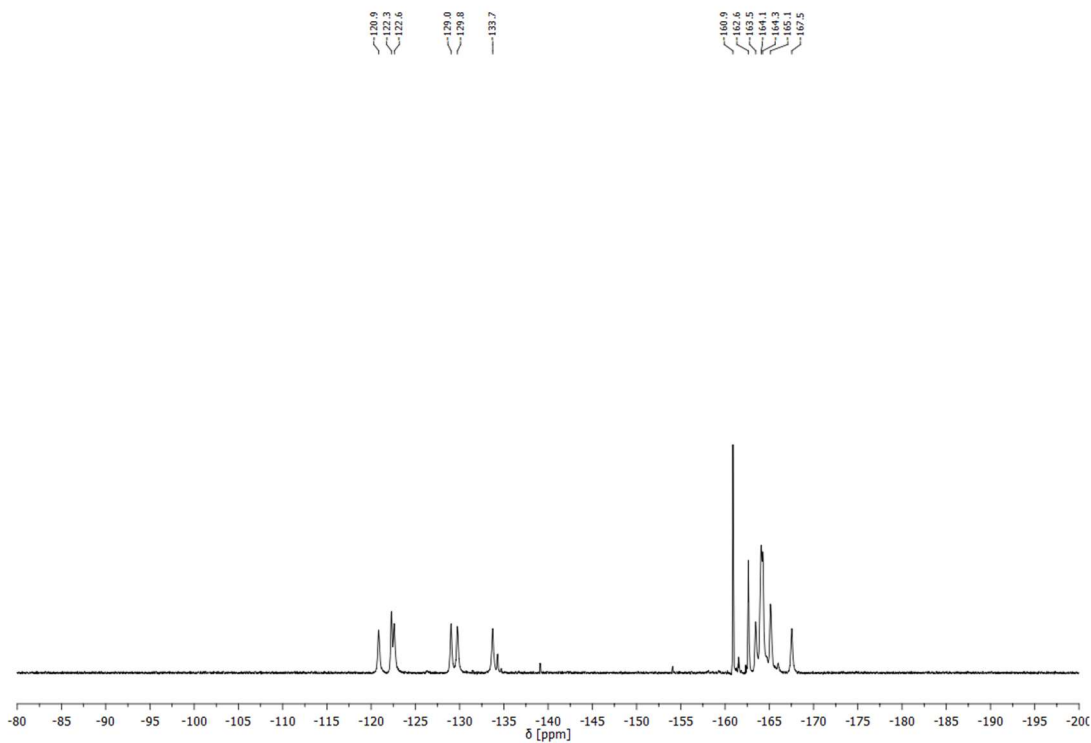

**Figure S4.**  $^{19}\text{F}$  NMR spectrum (376.5 MHz,  $\text{C}_6\text{D}_6$ ) of  $\text{CyL}_2\text{Ga}_2\text{-B}(\text{C}_6\text{F}_5)_3$  (**1-B**).

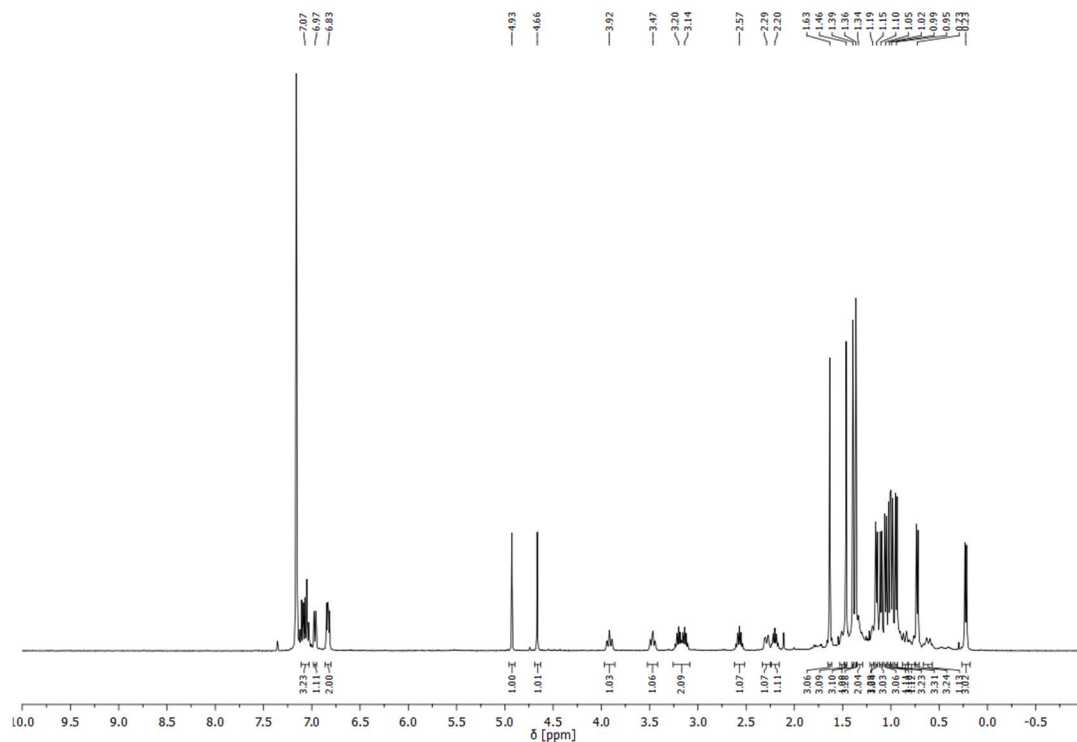

Figure S5.  $^1\text{H}$  NMR spectrum (400.1 MHz,  $\text{C}_6\text{D}_6$ ) of  $\text{CyL}_2\text{Ga}_2\text{-Al}(\text{C}_6\text{F}_5)_3$  (**1-AI**).

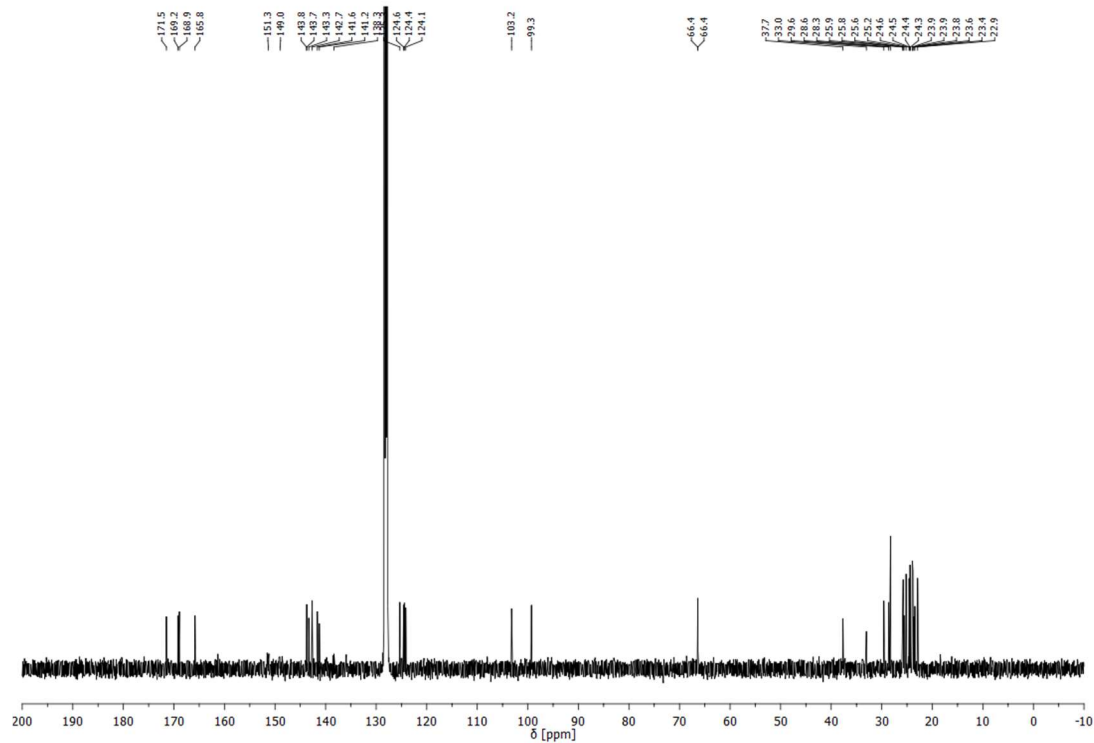

Figure S6.  $^{13}\text{C}\{^1\text{H}\}$  NMR spectrum (100.6 MHz,  $\text{C}_6\text{D}_6$ ) of  $\text{CyL}_2\text{Ga}_2\text{-Al}(\text{C}_6\text{F}_5)_3$  (**1-AI**).

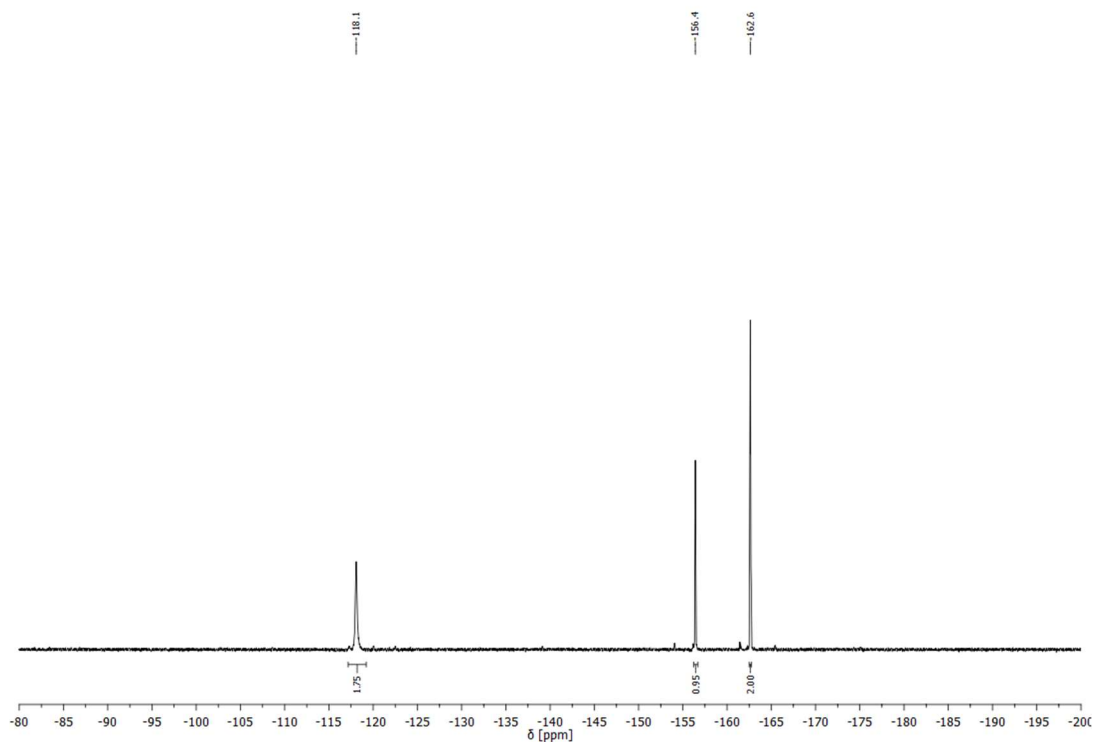

**Figure S7.**  $^{19}\text{F}$  NMR spectrum (376.5 MHz,  $\text{C}_6\text{D}_6$ ) of  $\text{CyL}_2\text{Ga}_2\text{-Al}(\text{C}_6\text{F}_5)_3$  (**1-AI**).

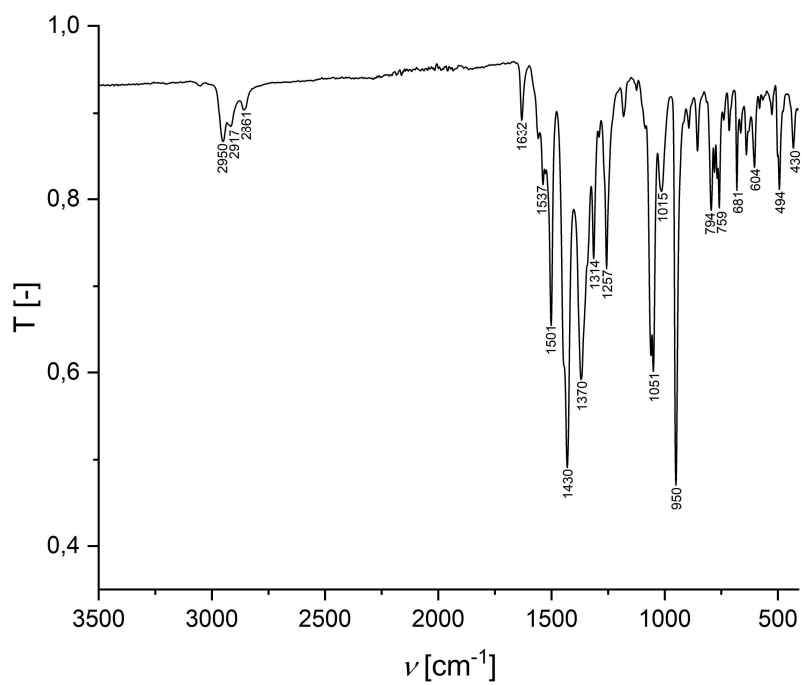

**Figure S8.** IR spectrum (neat) of  $\text{CyL}_2\text{Ga}_2\text{-Al}(\text{C}_6\text{F}_5)_3$  (**1-AI**).

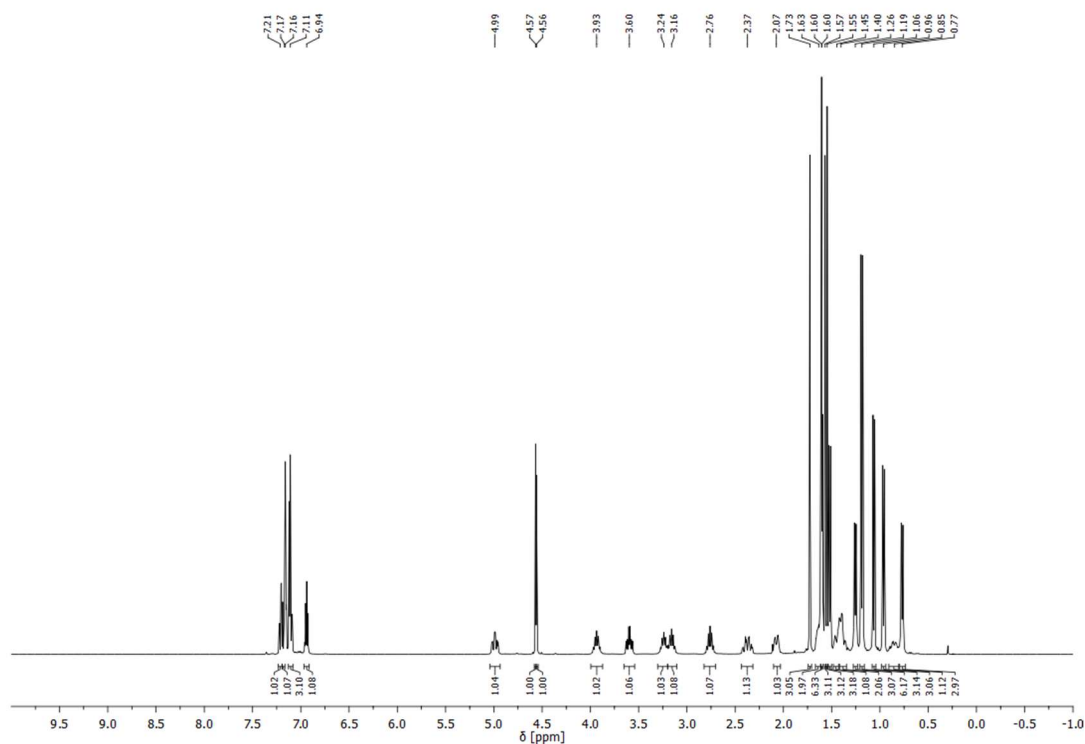

Figure S9.  $^1\text{H}$  NMR spectrum (400.1 MHz,  $\text{C}_6\text{D}_6$ ) of  $\text{CyL}_2\text{Ga}_2\text{Cl}_2$  ( $\mathbf{1-Cl}_2$ ).

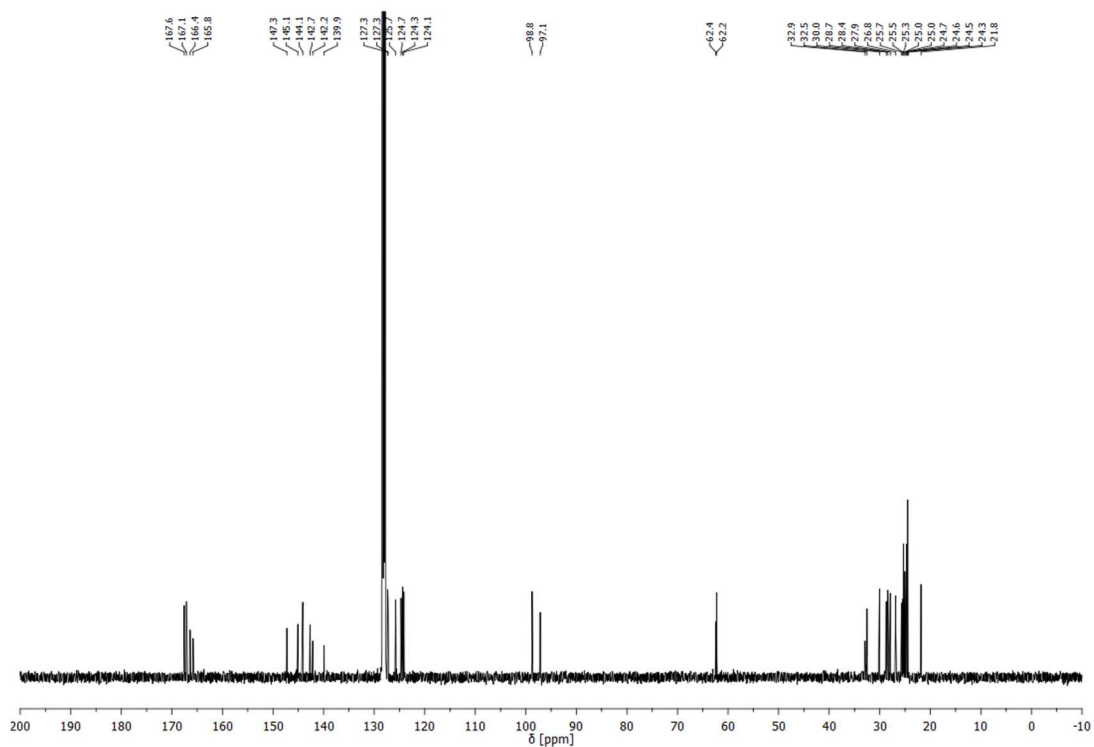

Figure S10.  $^{13}\text{C}\{^1\text{H}\}$  NMR spectrum (100.6 MHz,  $\text{C}_6\text{D}_6$ ) of  $\text{CyL}_2\text{Ga}_2\text{Cl}_2$  ( $\mathbf{1-Cl}_2$ ).

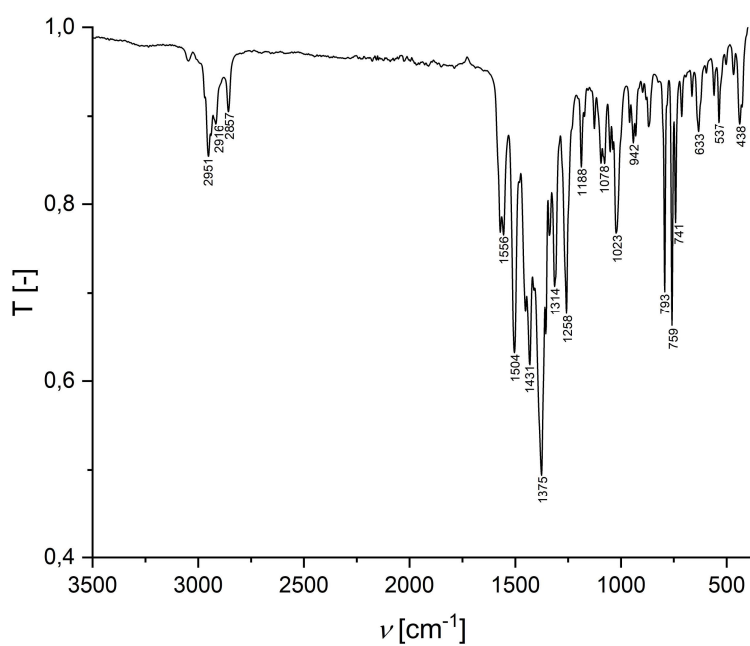

Figure S11. IR spectrum (neat) of  $\text{C}^{\text{y}}\text{L}_2\text{Ga}_2\text{Cl}_2$  (**1-Cl**<sub>2</sub>).

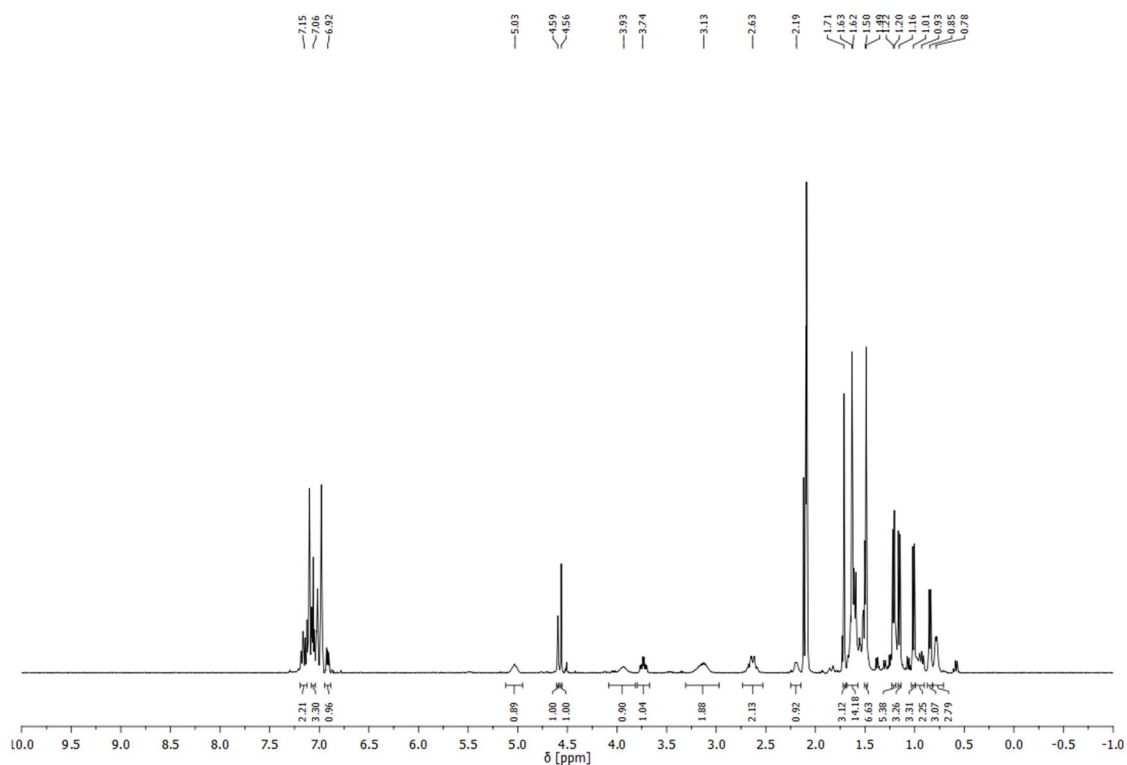

Figure S12.  $^1\text{H}$  NMR spectrum (400.1 MHz, toluene- $\text{d}_8$ ) of  $\text{C}^{\text{y}}\text{L}_2\text{Ga}_2\text{I}_2$  (**1-I**<sub>2</sub>).



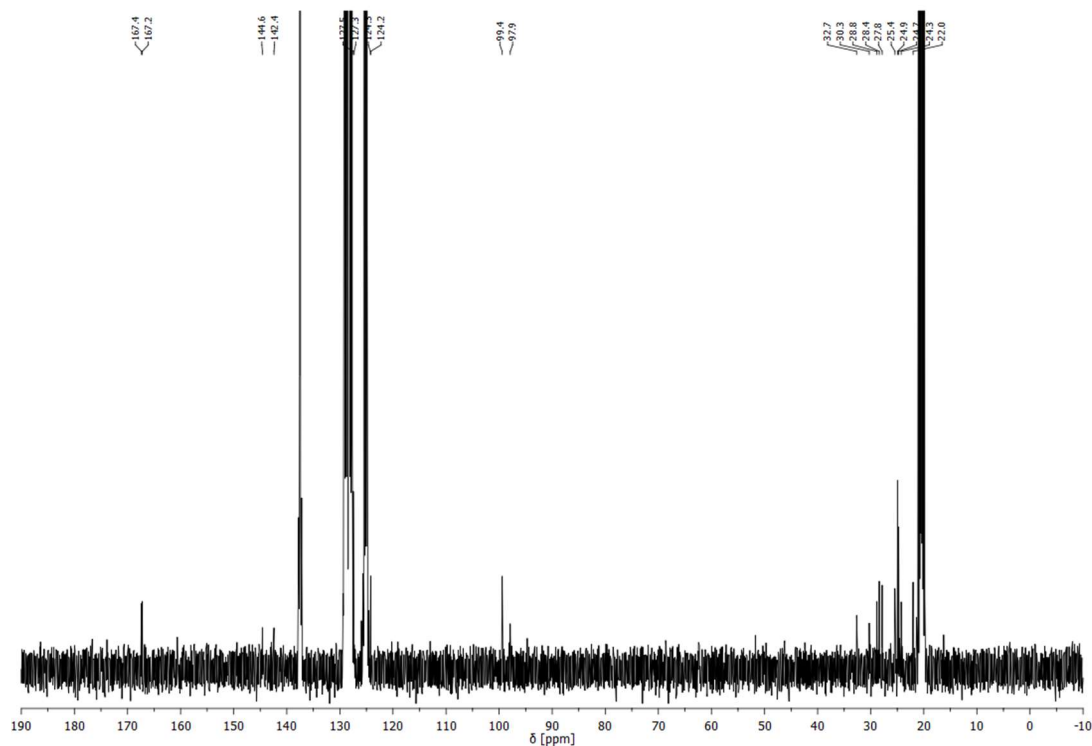

**Figure S13.**  $^{13}\text{C}\{^1\text{H}\}$  NMR spectrum (100.6 MHz, toluene- $d_8$ ) of  $\text{C}_{12}\text{L}_2\text{Ga}_2\text{I}_2$  (**1-I<sub>2</sub>**).

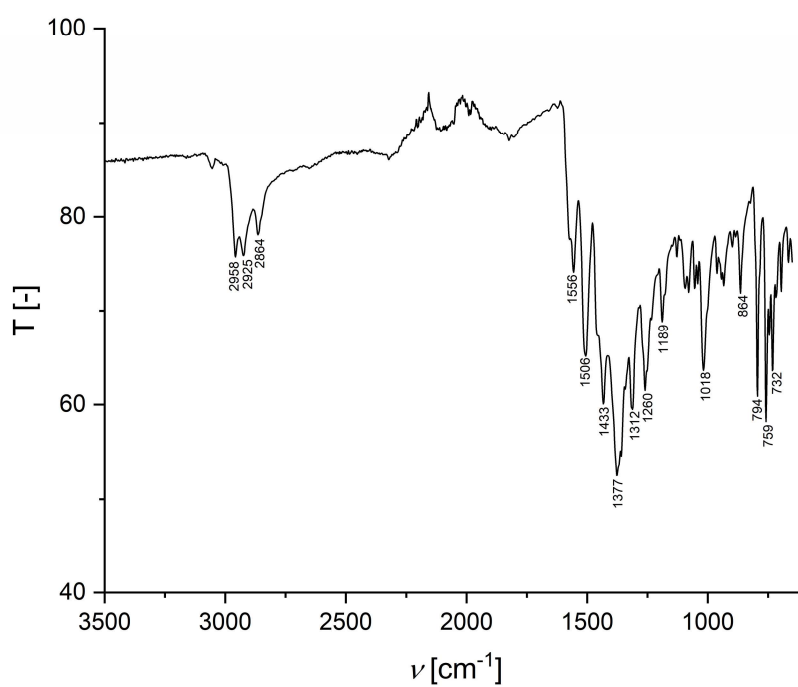

**Figure S14.** IR spectrum (neat) of  $\text{C}_{12}\text{L}_2\text{Ga}_2\text{I}_2$  (**1-I<sub>2</sub>**).

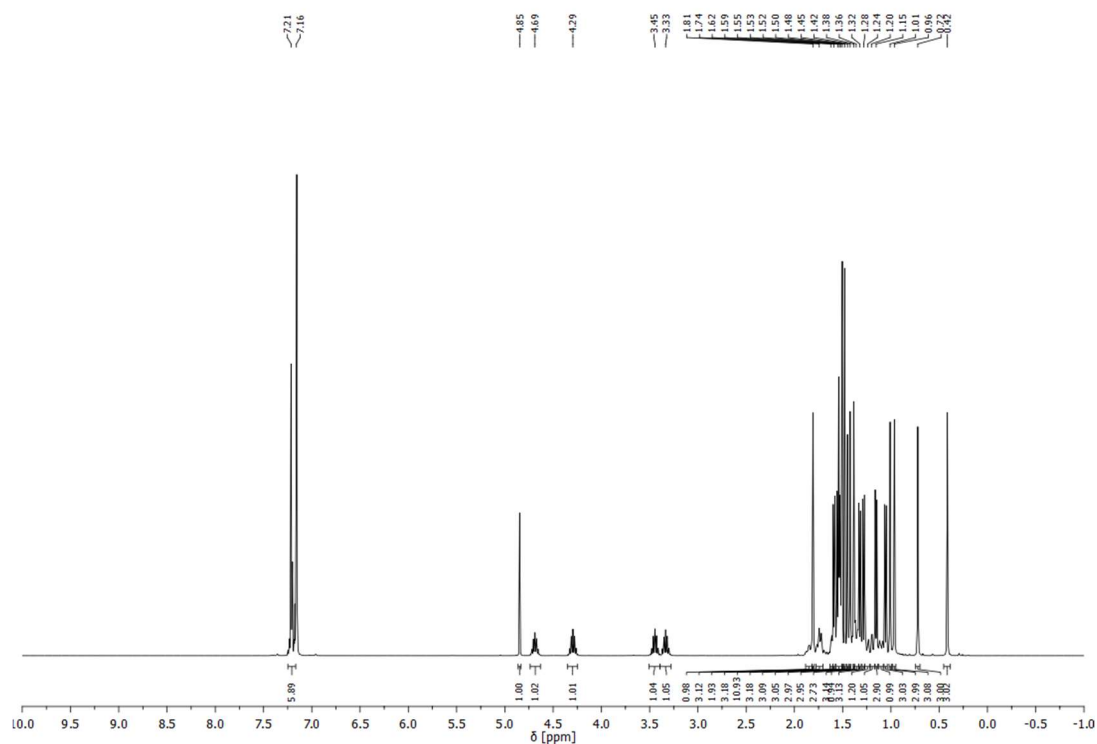

Figure S15.  $^1\text{H}$  NMR spectrum (400.1 MHz,  $\text{C}_6\text{D}_6$ ) of  $\text{LGa}(\text{TEMPO})_2$  ( $2-(\text{TEMPO})_2$ ).

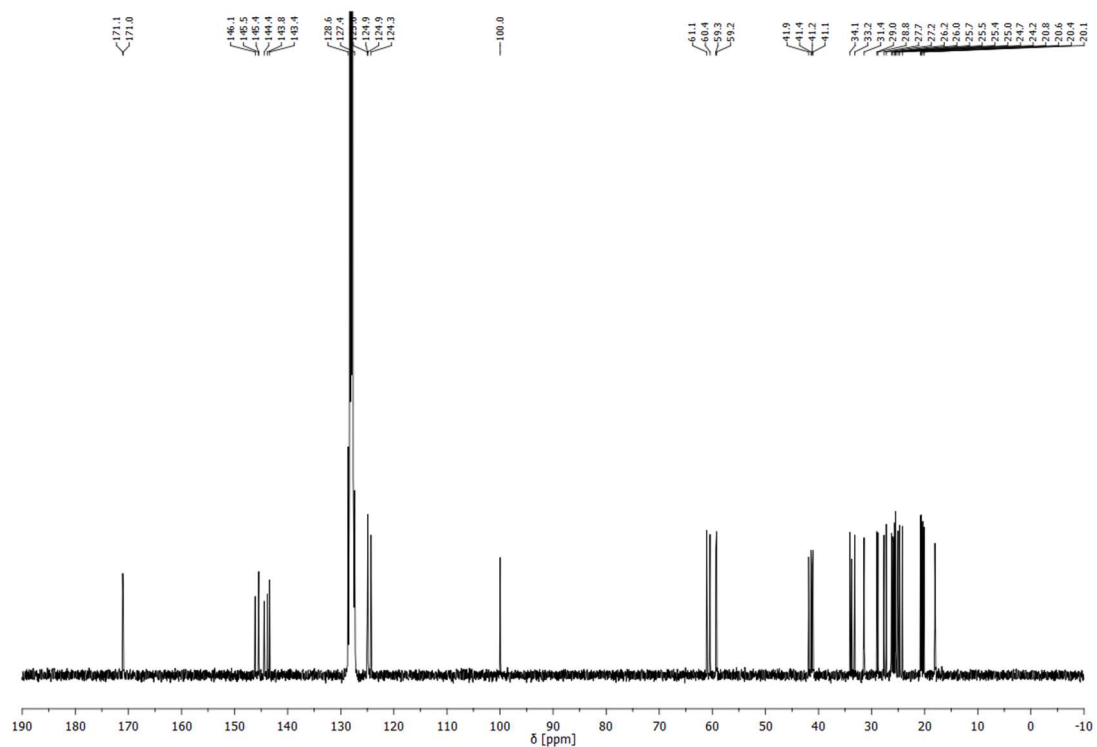

Figure S16.  $^{13}\text{C}\{^1\text{H}\}$  NMR spectrum (100.6 MHz,  $\text{C}_6\text{D}_6$ ) of  $\text{LGa}(\text{TEMPO})_2$  ( $2-(\text{TEMPO})_2$ ).

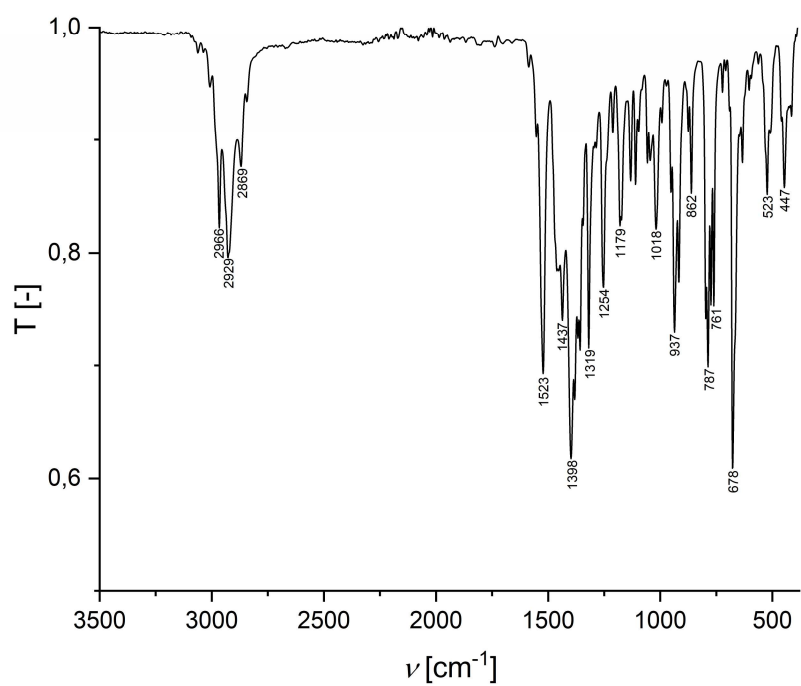

Figure S17. IR spectrum (neat) of  $\text{LGa}(\text{TEMPO})_2$  ( $2-(\text{TEMPO})_2$ ).

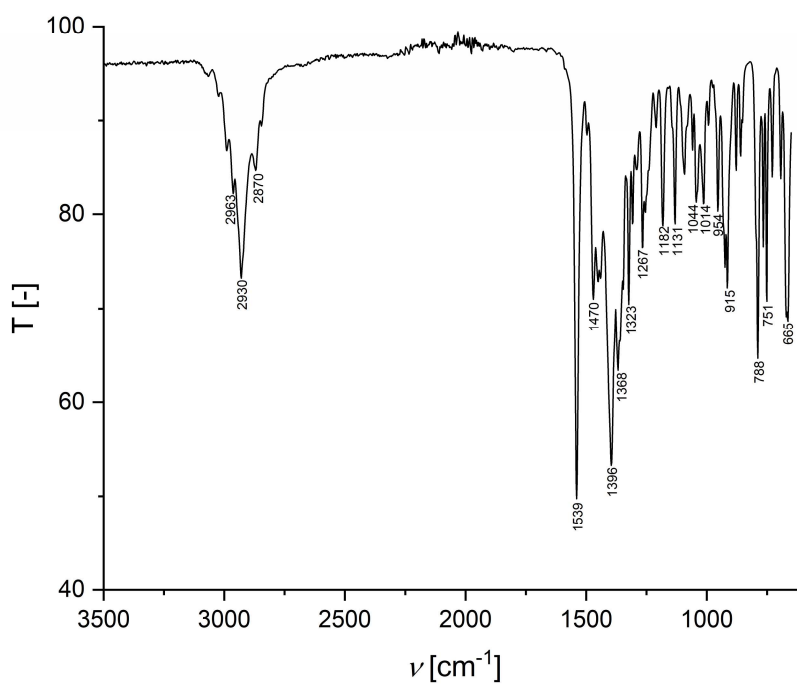

Figure S18. IR spectrum (neat) of  ${}^{\text{cy}}\text{L}_2\text{Ga}_2(\text{TEMPO})_2$  ( $1-(\text{TEMPO})_4$ ).

**Cross-over experiment between  ${}^{\text{C}}\text{L}_2\text{Ga}_2$  (**1**) and  $\text{LGa-B}(\text{C}_6\text{F}_5)_3$  (**2-B}(\text{C}\_6\text{F}\_5)\_3).**  ${}^{\text{C}}\text{L}_2\text{Ga}_2$  **1** (5 mg, 0.00681 mmol) and  $\text{LGa-B}(\text{C}_6\text{F}_5)_3$  **2-B** (7 mg, 0.00681 mmol) were dissolved in  $\text{C}_6\text{D}_6$  (0.5 mL) at ambient temperature affording a bright yellow solution, which was subjected to  ${}^1\text{H}$  NMR spectroscopic analysis.**

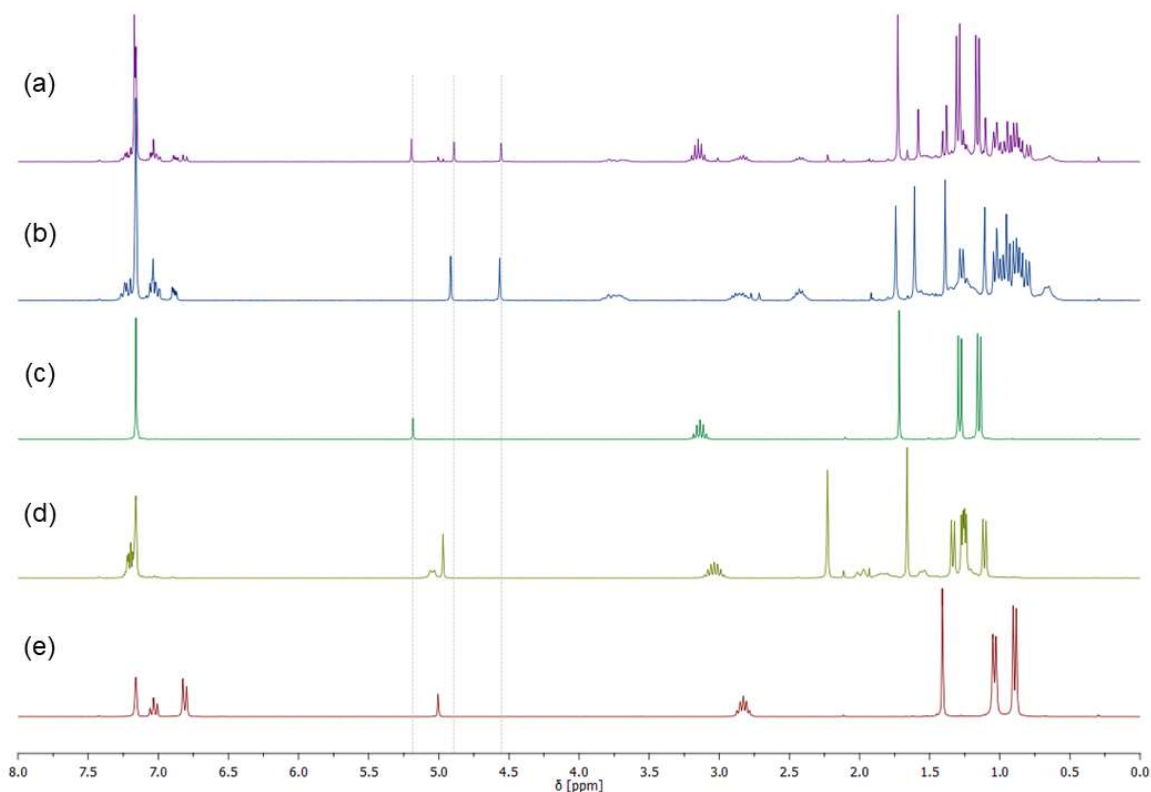

**Figure S19.** Stacked plot of  ${}^1\text{H}$  NMR spectra (300.1 MHz,  $\text{C}_6\text{D}_6$ ) of (a) the cross-over experiment between  ${}^{\text{C}}\text{L}_2\text{Ga}_2$  **1** and  $\text{LGa-B}(\text{C}_6\text{F}_5)_3$  **2-B**, (b)  ${}^{\text{C}}\text{L}_2\text{Ga}_2\text{-B}(\text{C}_6\text{F}_5)_3$  **1-B**, (c)  $\text{LGa}$  **2**, (d)  ${}^{\text{C}}\text{L}_2\text{Ga}_2$  **1**, and (e)  $\text{LGa-B}(\text{C}_6\text{F}_5)_3$  **2-B**. Grey dashed lines are drawn for simplified assignment *via* the corresponding  $\gamma$ -CH resonances.

**Cross-over experiment between  ${}^{\text{C}}\text{L}_2\text{Ga}_2$  (**1**) and  $\text{LGa-Al}(\text{C}_6\text{F}_5)_3$  (**2-Al**).**  ${}^{\text{C}}\text{L}_2\text{Ga}_2$  **1** (5 mg, 0.00681 mmol) and  $\text{LGa-Al}(\text{C}_6\text{F}_5)_3$  **2-Al** (8 mg, 0.00681 mmol) were dissolved in  $\text{C}_6\text{D}_6$  (0.5 mL) at ambient temperature affording a bright yellow solution, which was subjected to  ${}^1\text{H}$  NMR spectroscopic analysis.

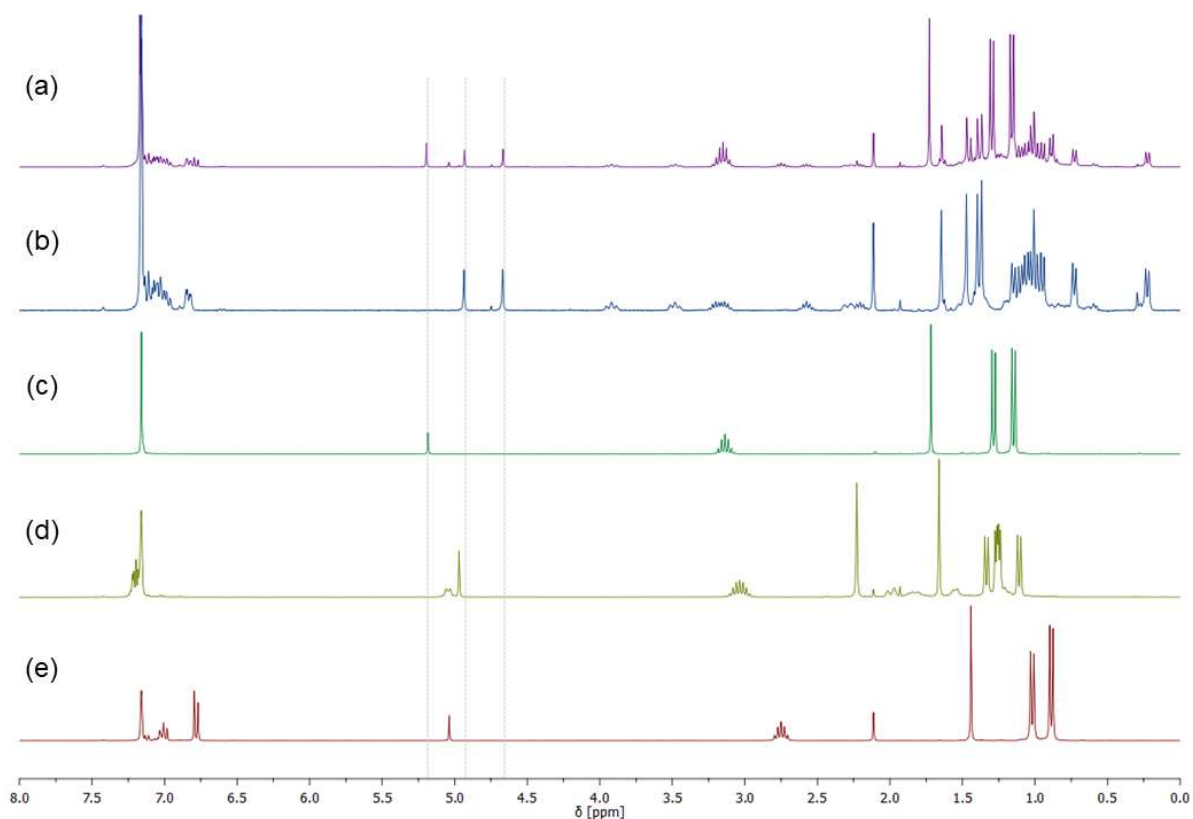

**Figure S20.** Stacked plot of  ${}^1\text{H}$  NMR spectra (300.1 MHz,  $\text{C}_6\text{D}_6$ ) of (a) the cross-over experiment between  ${}^{\text{C}}\text{L}_2\text{Ga}_2$  **1** and  $\text{LGa-Al}(\text{C}_6\text{F}_5)_3$  **2-Al**, (b)  ${}^{\text{C}}\text{L}_2\text{Ga}_2\text{-Al}(\text{C}_6\text{F}_5)_3$  **1-Al**, (c)  $\text{LGa}$  **2**, (d)  ${}^{\text{C}}\text{L}_2\text{Ga}_2$  **1**, and (e)  $\text{LGa-Al}(\text{C}_6\text{F}_5)_3$  **2-Al**. Grey dashed lines are drawn for simplified assignment *via* the corresponding  $\gamma\text{-CH}$  resonances.

**Cross-over experiment between  $^{13}\text{C}$ -L<sub>2</sub>Ga<sub>2</sub> (1) and LGaCl<sub>2</sub> (2-Cl<sub>2</sub>).**  $^{13}\text{C}$ -L<sub>2</sub>Ga<sub>2</sub> **1** (5 mg, 0.00681 mmol) and LGaCl<sub>2</sub> **2-Cl<sub>2</sub>** (4 mg, 0.00681 mmol) were dissolved in C<sub>6</sub>D<sub>6</sub> (0.5 mL) at ambient temperature and heated to 90 °C, while monitoring the reaction progress *via* <sup>1</sup>H NMR spectroscopy. Full conversion of  $^{13}\text{C}$ -L<sub>2</sub>Ga<sub>2</sub> **1** of was achieved after 2 days.

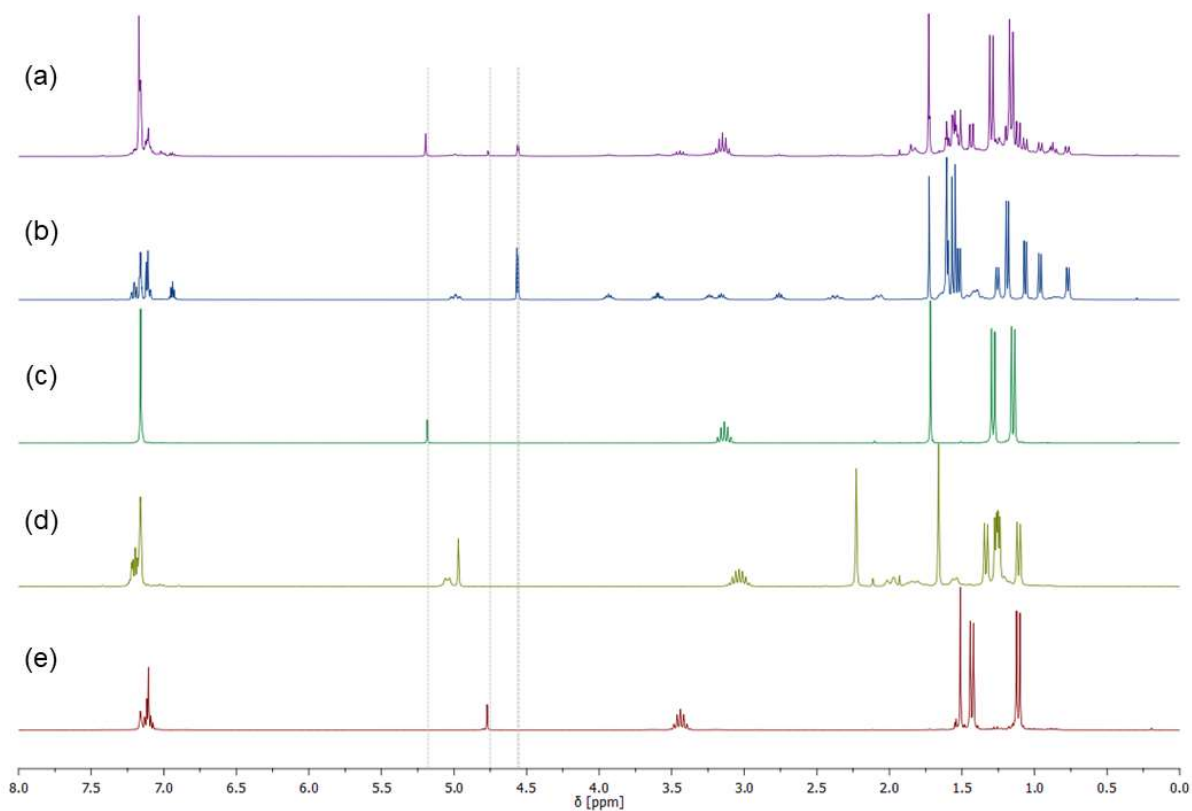

**Figure S21.** Stacked plot of <sup>1</sup>H NMR spectra (300.1 MHz, C<sub>6</sub>D<sub>6</sub>) of (a) the cross-over experiment between  $^{13}\text{C}$ -L<sub>2</sub>Ga<sub>2</sub> **1** and LGaCl<sub>2</sub> **2-Cl<sub>2</sub>**, (b)  $^{13}\text{C}$ -L<sub>2</sub>Ga<sub>2</sub>Cl<sub>2</sub> **1-Cl<sub>2</sub>**, (c) LGa **2**, (d)  $^{13}\text{C}$ -L<sub>2</sub>Ga<sub>2</sub> **1**, and (e) LGaCl<sub>2</sub> **2-Cl<sub>2</sub>**. Grey dashed lines are drawn for simplified assignment *via* the corresponding  $\gamma$ -CH resonances.

**Cross-over experiment between  $^{13}\text{C}_2\text{Ga}_2$  (1) and  $\text{L GaI}_2$  (2-I<sub>2</sub>).**  $^{13}\text{C}_2\text{Ga}_2$  **1** (5 mg, 0.00681 mmol) and  $\text{L GaI}_2$  **2-I<sub>2</sub>** (5 mg, 0.00681 mmol) were dissolved in  $\text{C}_6\text{D}_6$  (0.5 mL) at ambient temperature and heated to 70 °C, while monitoring the reaction progress *via*  $^1\text{H}$  NMR spectroscopy. Full conversion of  $^{13}\text{C}_2\text{Ga}_2$  **1** was achieved after 5 days.

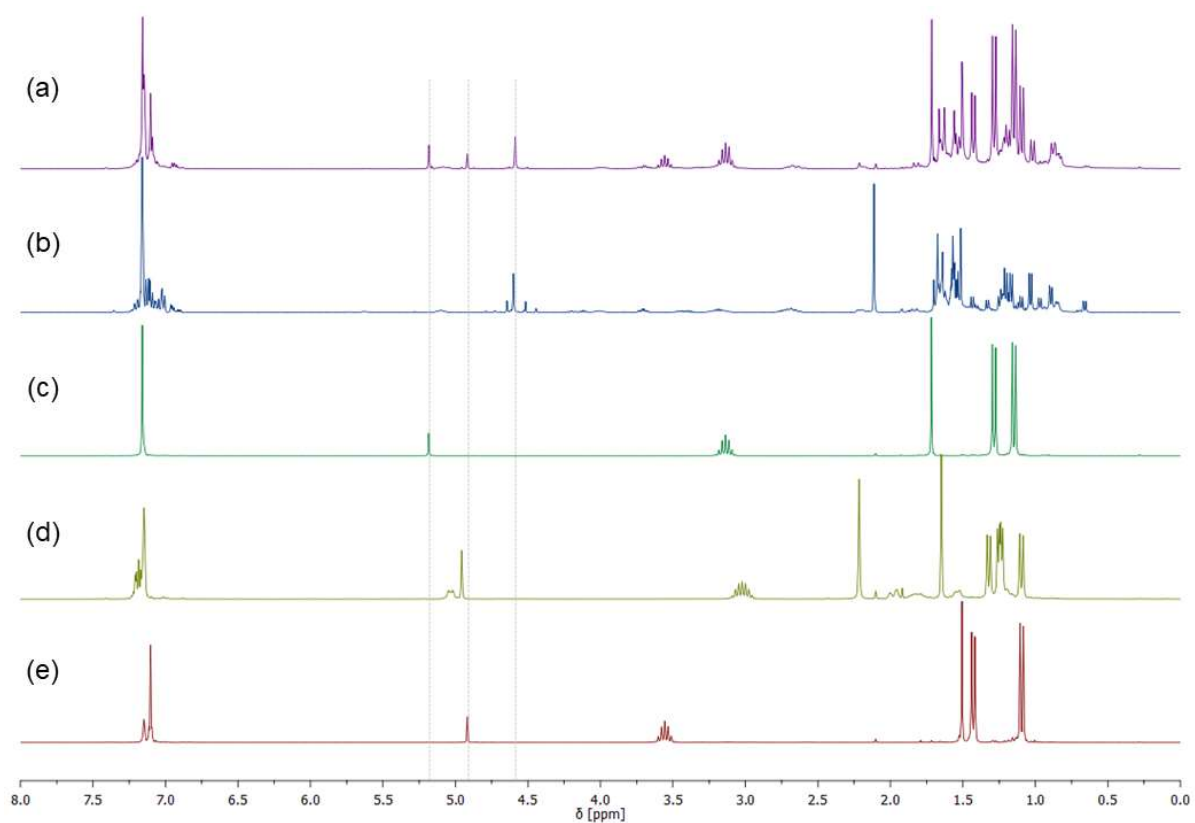

**Figure S22.** Stacked plot of  $^1\text{H}$  NMR spectra (300.1 MHz,  $\text{C}_6\text{D}_6$ ) of (a) the cross-over experiment between  $^{13}\text{C}_2\text{Ga}_2$  **1** and  $\text{L GaI}_2$  **2-I<sub>2</sub>**, (b)  $^{13}\text{C}_2\text{Ga}_2$  **1-I<sub>2</sub>**, (c)  $\text{L GaI}_2$  **2**, (d)  $^{13}\text{C}_2\text{Ga}_2$  **1**, and (e)  $\text{L GaI}_2$  **2-I<sub>2</sub>**. Grey dashed lines are drawn for simplified assignment *via* the corresponding  $\gamma$ -CH resonances.

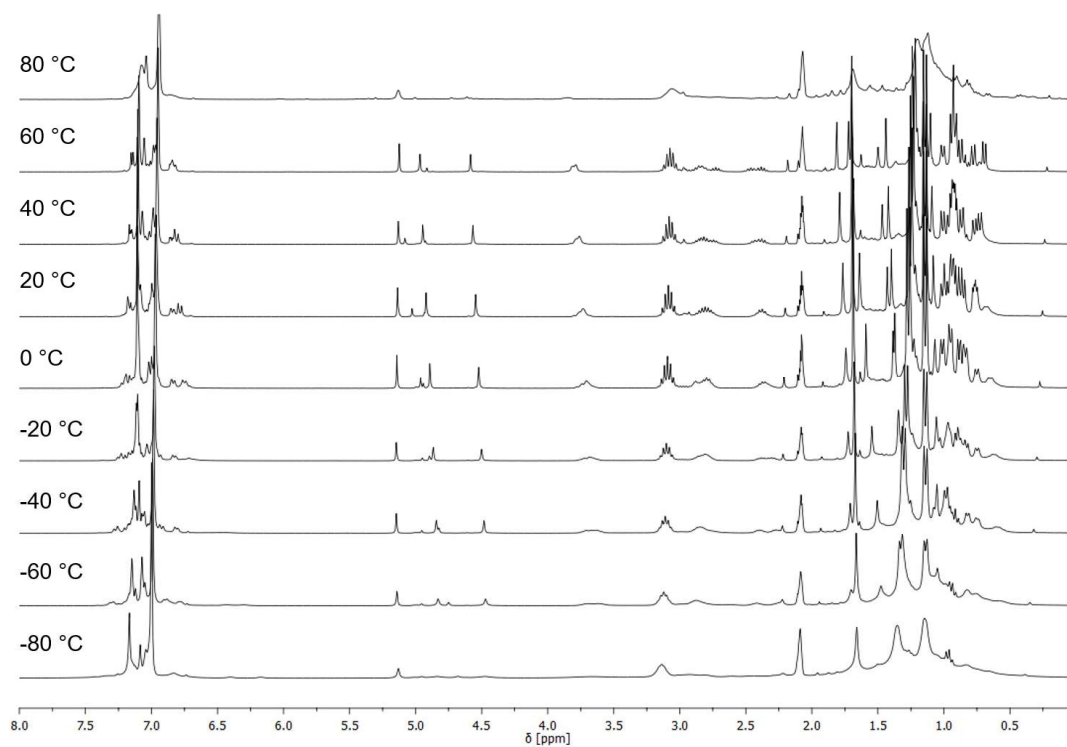

**Figure S23.** Variable-temperature  $^1\text{H}$  NMR spectra (300.1 MHz,  $\text{Tol-}d_8$ ) of the reaction mixture containing  $\text{CyL}_2\text{Ga}_2$  **1** and  $\text{LGa-B}(\text{C}_6\text{F}_5)_3$  **2-B**.

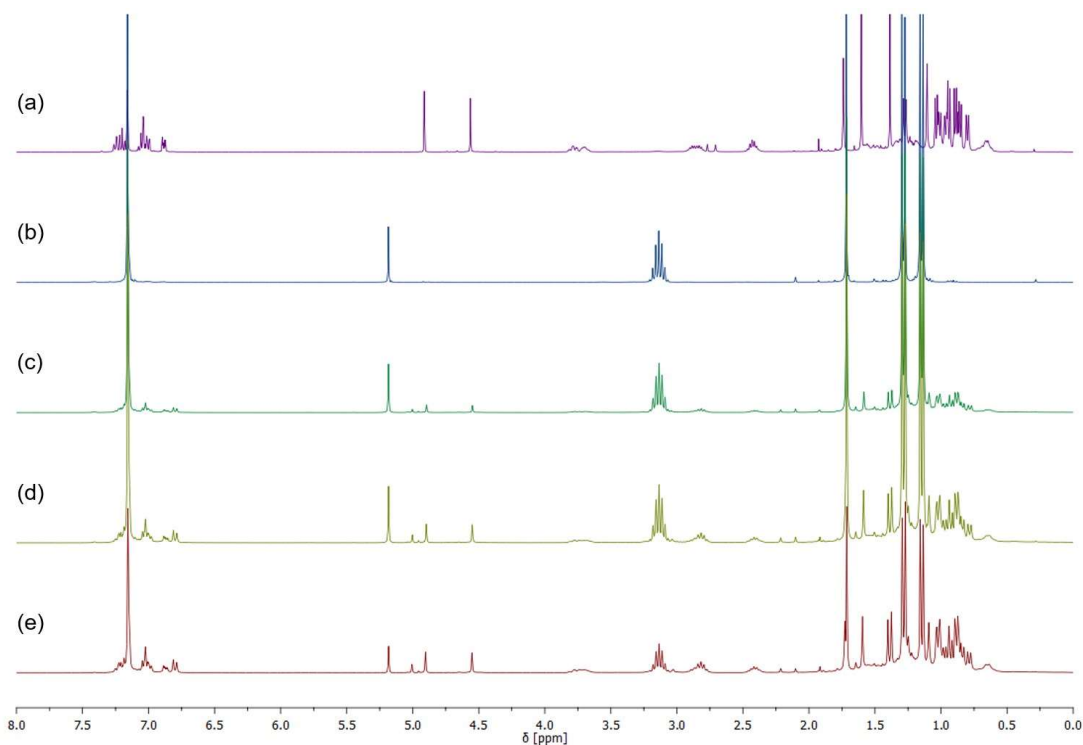

**Figure S24.** Stacked plot of  $^1\text{H}$  NMR spectra (300.1 MHz,  $\text{C}_6\text{D}_6$ ) of (a)  $\text{CyL}_2\text{Ga}_2\text{-B}(\text{C}_6\text{F}_5)_3$  **1-B**, (b)  $\text{LGa}$  **2**, (c)  $\text{CyL}_2\text{Ga}_2$  **1** and  $\text{LGa-B}(\text{C}_6\text{F}_5)_3$  **2-B** + 3 eq of  $\text{LGa}$  **2**, (d)  $\text{CyL}_2\text{Ga}_2$  **1** and  $\text{LGa-B}(\text{C}_6\text{F}_5)_3$  **2-B** + 1 eq of  $\text{LGa}$  **2**, and (e)  $\text{CyL}_2\text{Ga}_2$  **1** and  $\text{LGa-B}(\text{C}_6\text{F}_5)_3$  **2-B**.



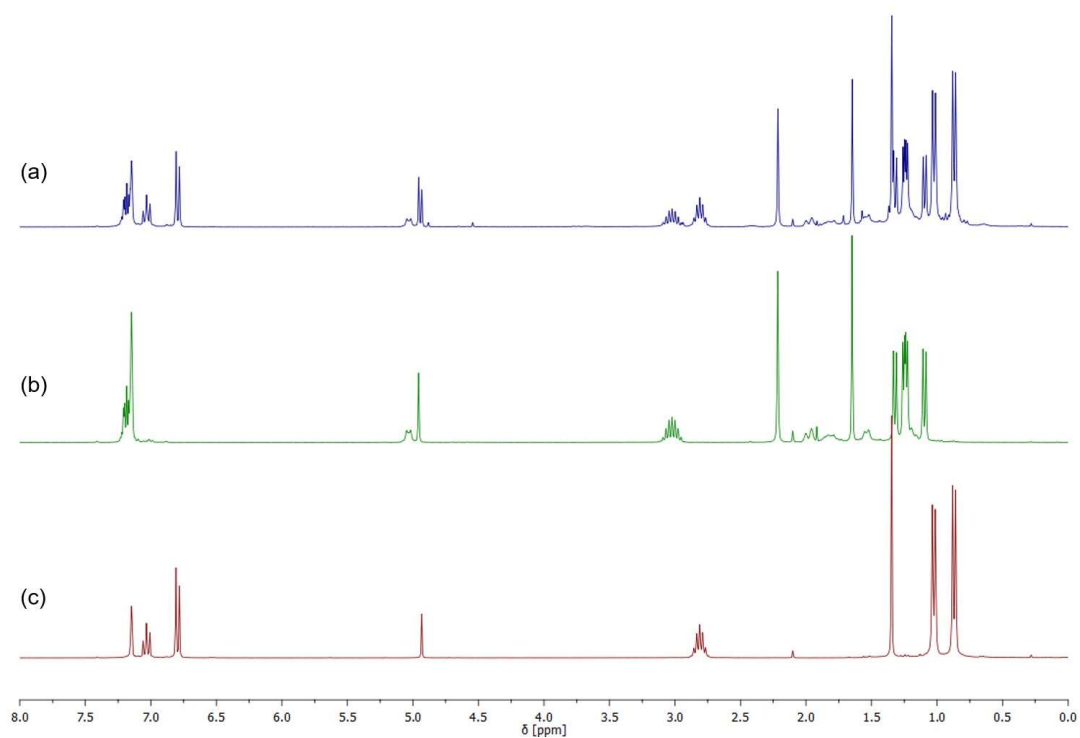

**Figure S25.** Stacked plot of  $^1\text{H}$  NMR spectra (300.1 MHz,  $\text{C}_6\text{D}_6$ ) of (a) the reaction mixture containing  $\text{C}^y\text{L}_2\text{Ga}_2$  **1** and  $\text{LAl-B}(\text{C}_6\text{F}_5)_3$ , (b)  $\text{C}^y\text{L}_2\text{Ga}_2$  **1**, and (c)  $\text{LAl-B}(\text{C}_6\text{F}_5)_3$ .

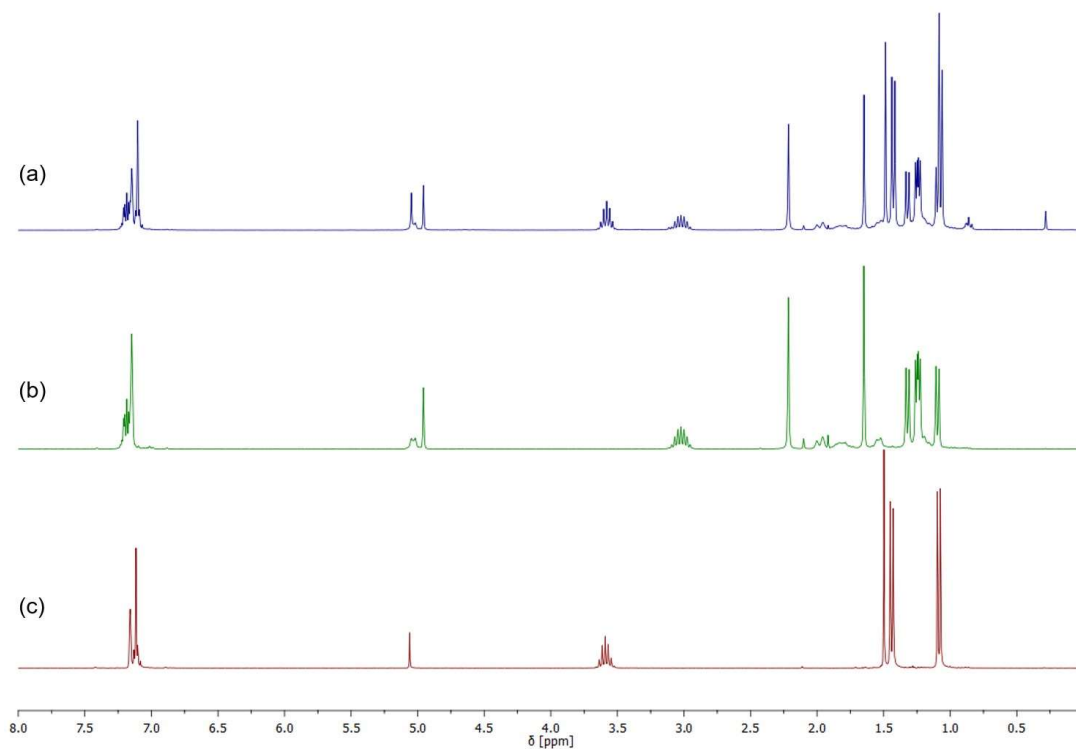

**Figure S26.** Stacked plot of  $^1\text{H}$  NMR spectra (300.1 MHz,  $\text{C}_6\text{D}_6$ ) of (a) the reaction mixture containing  $\text{C}^y\text{L}_2\text{Ga}_2$  **1** and  $\text{LAlI}_2$ , (b)  $\text{C}^y\text{L}_2\text{Ga}_2$  **1**, and (c)  $\text{LAlI}_2$ .

## II. Single-Crystal X-ray Diffraction

**Table S1.** Crystallographic details of **1–Al**, **1–Cl<sub>2</sub>** and **1–I<sub>2</sub>**.

|                                                              | <b>1–Al</b>                                                                            | <b>1–Cl<sub>2</sub></b>                                                        | <b>1–I<sub>2</sub></b>                                                                                                |
|--------------------------------------------------------------|----------------------------------------------------------------------------------------|--------------------------------------------------------------------------------|-----------------------------------------------------------------------------------------------------------------------|
| Empirical formula                                            | C <sub>70.86</sub> H <sub>70.86</sub> AlF <sub>15</sub> Ga <sub>2</sub> N <sub>4</sub> | C <sub>40</sub> H <sub>58</sub> Cl <sub>2</sub> Ga <sub>2</sub> N <sub>4</sub> | C <sub>40</sub> H <sub>58</sub> Ga <sub>2</sub> I <sub>2</sub> N <sub>4</sub> •0.25<br>C <sub>6</sub> H <sub>14</sub> |
| <i>M</i> [g mol <sup>-1</sup> ]                              | 1429.94                                                                                | 805.24                                                                         | 1009.68                                                                                                               |
| Crystal size [mm]                                            | 0.337 x 0.230 x 0.154                                                                  | 0.206 x 0.136 x 0.095                                                          | 0.102 x 0.094 x 0.088                                                                                                 |
| <i>T</i> [K]                                                 | 100(2)                                                                                 | 100(2)                                                                         | 133(2)                                                                                                                |
| Crystal system                                               | triclinic                                                                              | triclinic                                                                      | monoclinic                                                                                                            |
| Space group                                                  | <i>P</i> -1                                                                            | <i>P</i> -1                                                                    | <i>P</i> 2 <sub>1</sub> / <i>c</i>                                                                                    |
| <i>a</i> [Å]                                                 | 13.4212(7)                                                                             | 8.8180(9)                                                                      | 9.3956(2)                                                                                                             |
| <i>b</i> [Å]                                                 | 13.8477(7)                                                                             | 14.0432(15)                                                                    | 19.7798(4)                                                                                                            |
| <i>c</i> [Å]                                                 | 17.6750(9)                                                                             | 16.3175(18)                                                                    | 24.2518(5)                                                                                                            |
| $\alpha$ [°]                                                 | 93.742(3)                                                                              | 88.348(4)                                                                      | 90                                                                                                                    |
| $\beta$ [°]                                                  | 90.471(3)                                                                              | 82.154(4)                                                                      | 91.776(1)                                                                                                             |
| $\gamma$ [°]                                                 | 94.259(3)                                                                              | 79.180(4)                                                                      | 90                                                                                                                    |
| <i>V</i> [Å <sup>3</sup> ]                                   | 3268.6(3)                                                                              | 1966.1(4)                                                                      | 4504.86(16)                                                                                                           |
| <i>Z</i>                                                     | 2                                                                                      | 2                                                                              | 4                                                                                                                     |
| <i>D</i> <sub>calcd</sub> [g cm <sup>-3</sup> ]              | 1.453                                                                                  | 1.360                                                                          | 1.489                                                                                                                 |
| $\mu$ ( <i>K</i> <sub>α</sub> ) [mm <sup>-1</sup> ]          | 0.926 (Mo)                                                                             | 1.539 (Mo)                                                                     | 2.598 (Mo)                                                                                                            |
| Transmissions                                                | 0.75/0.58                                                                              | 0.75/0.68                                                                      | 0.75/0.58                                                                                                             |
| <i>F</i> (000)                                               | 1468                                                                                   | 844                                                                            | 2026                                                                                                                  |
| Index ranges                                                 | -17 ≤ <i>h</i> ≤ 17<br>-18 ≤ <i>k</i> ≤ 18<br>-23 ≤ <i>l</i> ≤ 23                      | -13 ≤ <i>h</i> ≤ 13<br>-21 ≤ <i>k</i> ≤ 21<br>-25 ≤ <i>l</i> ≤ 25              | -12 ≤ <i>h</i> ≤ 11<br>-19 ≤ <i>k</i> ≤ 25<br>-30 ≤ <i>l</i> ≤ 31                                                     |
| $\theta$ <sub>max</sub> [°]                                  | 28.706                                                                                 | 33.619                                                                         | 27.484                                                                                                                |
| Reflections collected                                        | 115956                                                                                 | 132428                                                                         | 23816                                                                                                                 |
| Independent reflections                                      | 16571                                                                                  | 15414                                                                          | 10228                                                                                                                 |
| <i>R</i> <sub>int</sub>                                      | 0.0667                                                                                 | 0.0311                                                                         | 0.0311                                                                                                                |
| Refined parameters                                           | 947                                                                                    | 466                                                                            | 503                                                                                                                   |
| <i>R</i> <sub>1</sub> [ <i>I</i> > 2σ( <i>I</i> )]           | 0.0619                                                                                 | 0.0248                                                                         | 0.0447                                                                                                                |
| <i>wR</i> <sub>2</sub> [all data]                            | 0.1539                                                                                 | 0.631                                                                          | 0.1213                                                                                                                |
| GooF                                                         | 1.152                                                                                  | 1.026                                                                          | 1.099                                                                                                                 |
| $\Delta\rho$ <sub>final</sub> (max/min) [e·Å <sup>-3</sup> ] | 1.504/-0.917                                                                           | 0.934/-0.685                                                                   | 2.080/-1.529                                                                                                          |

**Table S2.** Crystallographic details of **1–(TEMPO)<sub>4</sub>**, **2–(TEMPO)<sub>2</sub>** and **S1**.

|                                                            | <b>1–(TEMPO)<sub>4</sub></b>                                                   | <b>2–(TEMPO)<sub>2</sub></b>                                      | <b>S1</b>                                                                      |
|------------------------------------------------------------|--------------------------------------------------------------------------------|-------------------------------------------------------------------|--------------------------------------------------------------------------------|
| Empirical formula                                          | C <sub>76</sub> H <sub>130</sub> Ga <sub>2</sub> N <sub>8</sub> O <sub>4</sub> | C <sub>50</sub> H <sub>80</sub> GaN <sub>4</sub> O <sub>2</sub>   | C <sub>40</sub> H <sub>58</sub> Cl <sub>4</sub> Ga <sub>2</sub> N <sub>4</sub> |
| <i>M</i> [g mol <sup>-1</sup> ]                            | 1359.32                                                                        | 838.90                                                            | 876.14                                                                         |
| Crystal size [mm]                                          | 0.46 x 0.14 x 0.12                                                             | 0.298 x 0.152 x 0.090                                             | 0.189 x 0.094 x 0.081                                                          |
| <i>T</i> [K]                                               | 120(2)                                                                         | 100(2)                                                            | 100(2)                                                                         |
| Crystal system                                             | monoclinic                                                                     | triclinic                                                         | orthorhombic                                                                   |
| Space group                                                | <i>C</i> 2                                                                     | <i>P</i> -1                                                       | <i>P</i> 2 <sub>1</sub> 2 <sub>1</sub> 2 <sub>1</sub>                          |
| <i>a</i> [Å]                                               | 20.896(3)                                                                      | 11.361(10)                                                        | 10.2640(19)                                                                    |
| <i>b</i> [Å]                                               | 11.169(1)                                                                      | 11.781(11)                                                        | 18.797(3)                                                                      |
| <i>c</i> [Å]                                               | 16.882(2)                                                                      | 19.831(17)                                                        | 22.810(4)                                                                      |
| $\alpha$ [°]                                               | 90                                                                             | 92.67(3)                                                          | 90                                                                             |
| $\beta$ [°]                                                | 108.583(4)                                                                     | 94.81(3)                                                          | 90                                                                             |
| $\gamma$ [°]                                               | 90                                                                             | 115.886(18)                                                       | 90                                                                             |
| <i>V</i> [Å <sup>3</sup> ]                                 | 3734.6(8)                                                                      | 2369(4)                                                           | 4400.9(14)                                                                     |
| <i>Z</i>                                                   | 2                                                                              | 2                                                                 | 4                                                                              |
| <i>D</i> <sub>calcd</sub> [g cm <sup>-3</sup> ]            | 1.209                                                                          | 1.176                                                             | 1.322                                                                          |
| $\mu(K_{\alpha})$ [mm <sup>-1</sup> ]                      | 0.773 (Mo)                                                                     | 0.622 (Mo)                                                        | 1.498 (Mo)                                                                     |
| Transmissions                                              | 0.7466; 0.4358                                                                 | 0.75/0.64                                                         | 0.75/0.64                                                                      |
| <i>F</i> (000)                                             | 1472                                                                           | 910                                                               | 1824                                                                           |
| Index ranges                                               | -28 ≤ <i>h</i> ≤ 28<br>-15 ≤ <i>h</i> ≤ 15<br>-23 ≤ <i>h</i> ≤ 23              | -17 ≤ <i>h</i> ≤ 17<br>-18 ≤ <i>k</i> ≤ 18<br>-30 ≤ <i>l</i> ≤ 30 | -15 ≤ <i>h</i> ≤ 15<br>-28 ≤ <i>k</i> ≤ 29<br>-35 ≤ <i>l</i> ≤ 35              |
| $\theta_{\max}$ [°]                                        | 28.999                                                                         | 33.192                                                            | 33.336                                                                         |
| Reflections collected                                      | 26209                                                                          | 193835                                                            | 164660                                                                         |
| Independent reflections                                    | 26209                                                                          | 17973                                                             | 16960                                                                          |
| <i>R</i> <sub>int</sub>                                    | 0.0782                                                                         | 0.0632                                                            | 0.0719                                                                         |
| Refined parameters                                         | 462                                                                            | 532                                                               | 463                                                                            |
| <i>R</i> <sub>1</sub> [ <i>I</i> > 2σ( <i>I</i> )]         | 0.0810                                                                         | 0.0366                                                            | 0.0312                                                                         |
| <i>wR</i> <sub>2</sub> [all data]                          | 0.2049                                                                         | 0.0964                                                            | 0.0680                                                                         |
| GooF                                                       | 1.029                                                                          | 1.063                                                             | 1.057                                                                          |
| $\Delta\rho_{\text{final}}$ (max/min) [e·Å <sup>-3</sup> ] | 4.223/-1.558                                                                   | 1.543/-0.576                                                      | 0.756/-0.421                                                                   |

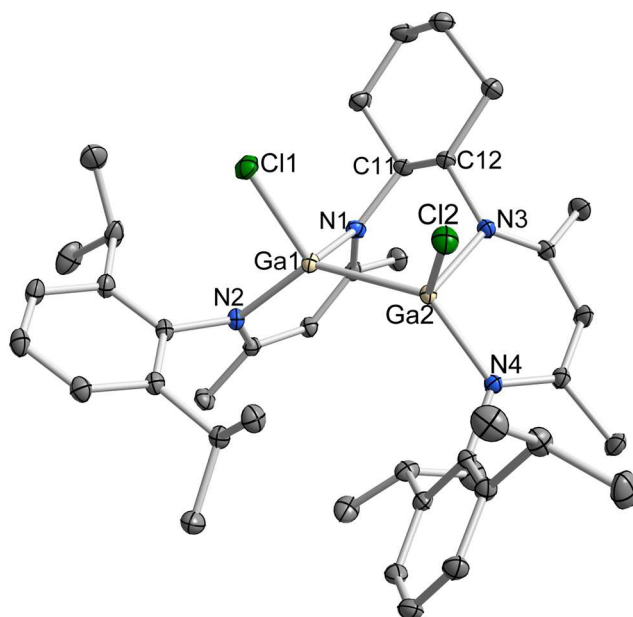

**Figure S27.** Molecular structure of **1-Cl<sub>2</sub>** in the solid-state. Hydrogen atoms, the minor components of the disordered Cl atom and cyclohexylene group were omitted for clarity. Displacement ellipsoids are drawn at 50% probability level.

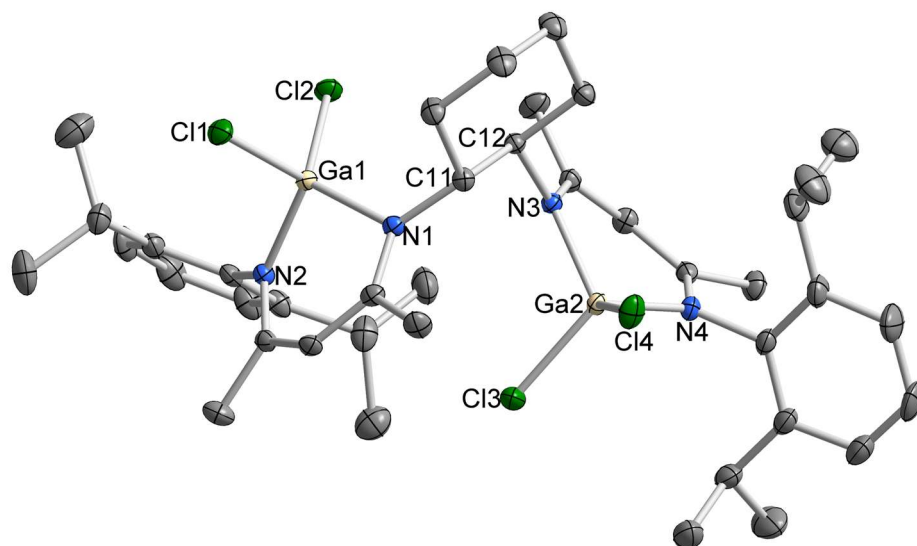

**Figure S28.** Molecular structure of <sup>v</sup>L<sub>2</sub>Ga<sub>2</sub>Cl<sub>4</sub> (**S1**) in the solid-state. Hydrogen atoms were omitted for clarity. Displacement ellipsoids are drawn at 50% probability level.

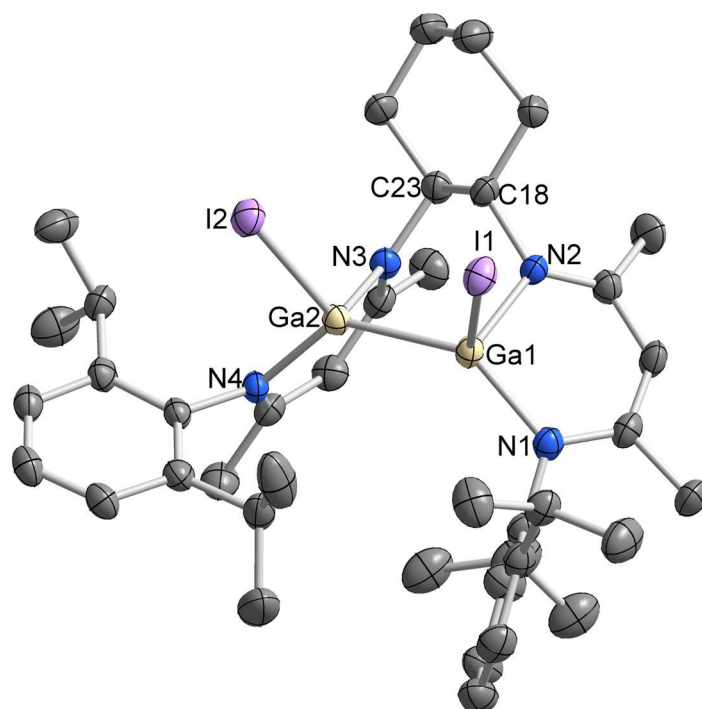

**Figure S29.** Molecular structure of **1-I<sub>2</sub>** in the solid-state. Hydrogen atoms, the minor component of the disordered *i*-Pr group, and the co-crystallized molecule of *n*-hexane were omitted for clarity. Displacement ellipsoids are drawn at 50% probability level.

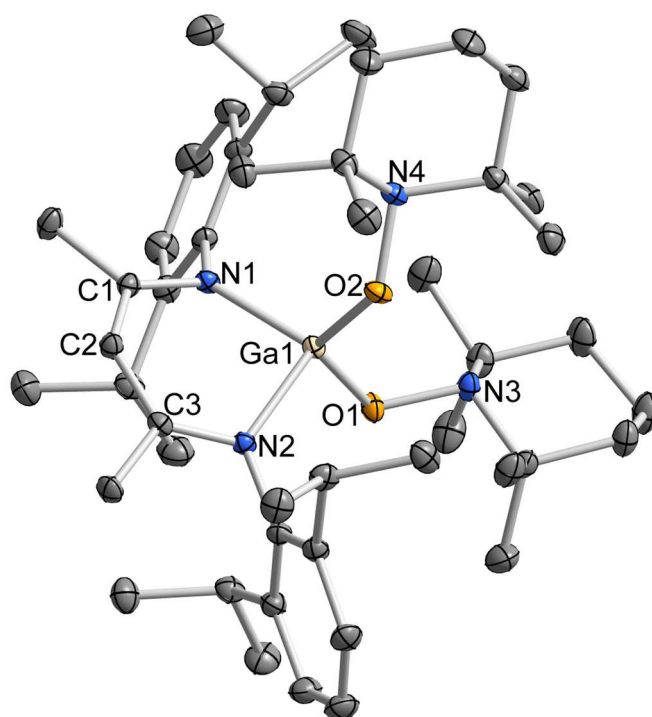

**Figure S30.** Molecular structure of **2-(TEMPO)<sub>2</sub>** in the solid-state. Hydrogen atoms and a co-crystallized molecule of benzene were omitted for clarity. Displacement ellipsoids are drawn at 50% probability level.

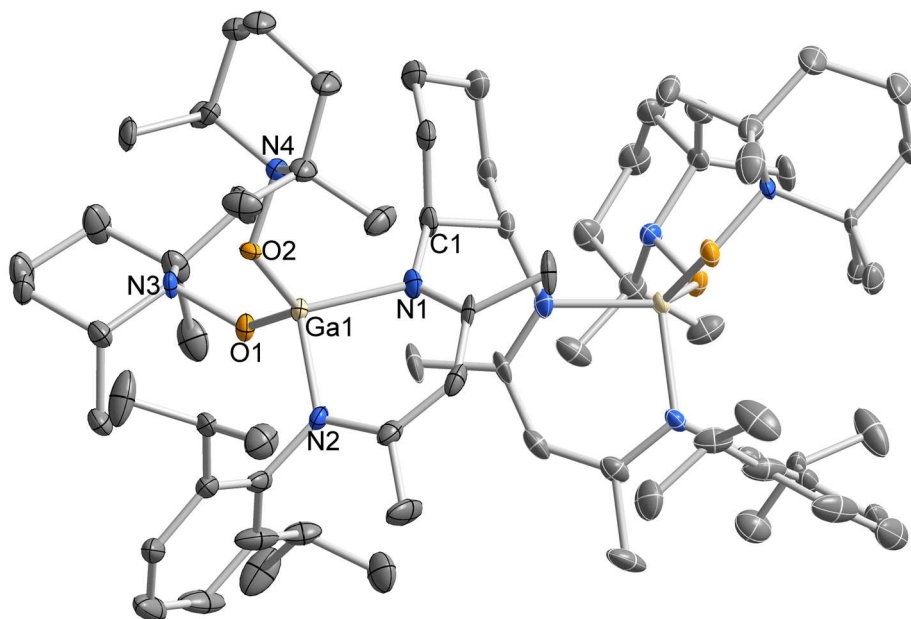

**Figure S31.** Molecular structure of **1-(TEMPO)<sub>4</sub>** in the solid-state. Hydrogen atoms and the minor components of the disordered *i*-Pr groups were omitted for clarity. Displacement ellipsoids are drawn at 50% probability level. The symmetry generated part is depicted with pale inner lines.

### III. Computational Details

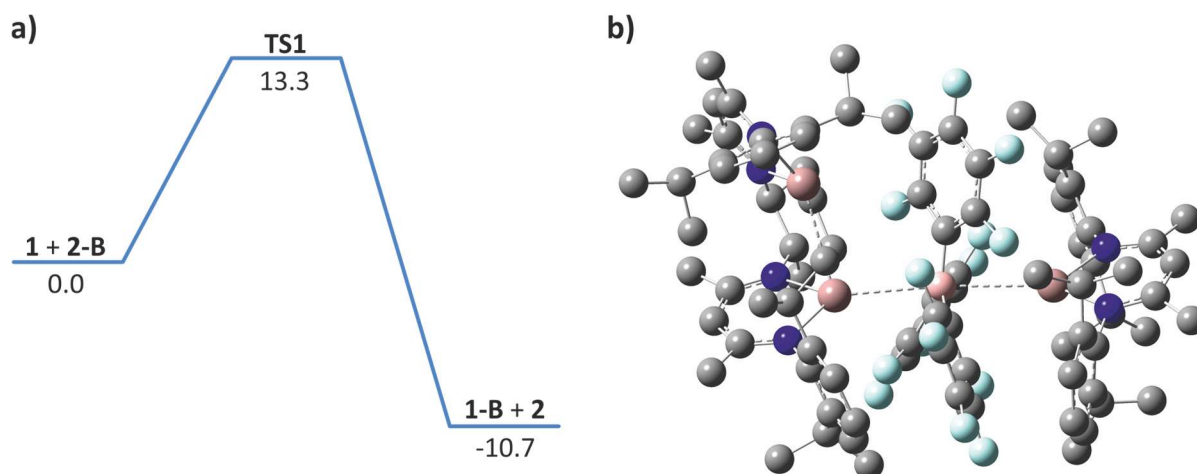

**Figure S32.** a) Potential-energy surface for the reaction of **1** with **2-B** and b) related transition state structure (hydrogen atoms are omitted for clarity calculated at the BP86(D3-BJ)/def2SVP level of theory.

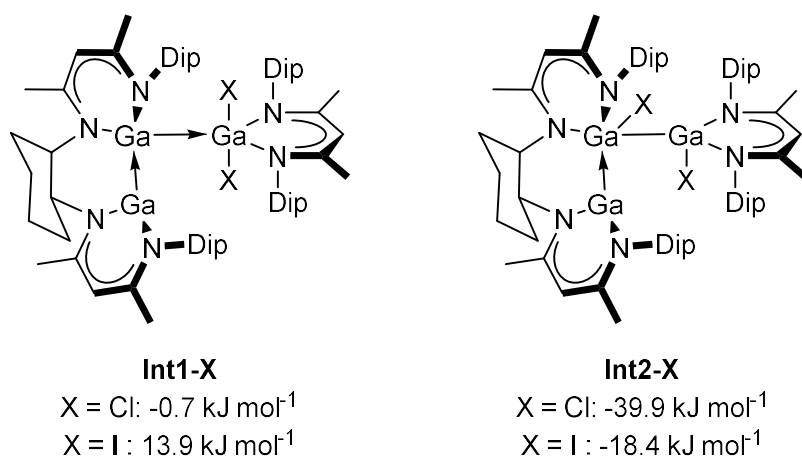

**Figure S33.** Local minima on the potential-energy surface *en route*  $\mathbf{1} + \mathbf{2-X}_2 \rightarrow \mathbf{1-X}_2 + \mathbf{2}$  calculated at the BP86(D3-BJ)/def2SVP level of theory.

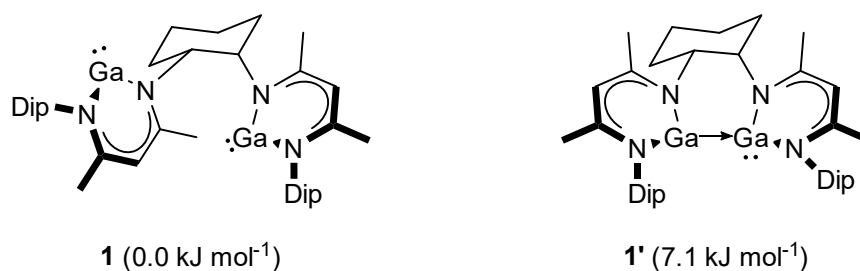

**Figure S34.** Bimetallic complex **1** and its isomer **1'** comprising an intramolecular donor-acceptor interaction along with corresponding relative energies.<sup>[1]</sup>

## IV. XYZ coordinates

|                                                            |           |           |           |                                                            |           |           |           |
|------------------------------------------------------------|-----------|-----------|-----------|------------------------------------------------------------|-----------|-----------|-----------|
| <b>1</b>                                                   |           |           |           | C                                                          | 1.160687  | 4.213375  | 0.886131  |
| Sum of electronic and thermal Free Energies = -5626.209873 |           |           |           | H                                                          | 1.600206  | 4.179619  | 1.905588  |
| <b>0 1</b>                                                 |           |           |           | H                                                          | 2.017075  | 4.156549  | 0.174838  |
| Ga                                                         | 2.344403  | 1.206800  | -0.657716 | C                                                          | 0.277334  | 2.967494  | 0.674865  |
| Ga                                                         | -2.522113 | 1.376318  | 0.543129  | H                                                          | -0.585108 | 3.036855  | 1.374275  |
| N                                                          | 2.862115  | -0.498893 | 0.417025  | C                                                          | -0.328461 | 2.991948  | -0.756748 |
| N                                                          | 1.027173  | 1.729055  | 0.921459  | H                                                          | 0.533610  | 3.020541  | -1.459348 |
| N                                                          | -1.137385 | 1.792869  | -1.001370 | C                                                          | -1.041671 | 1.158584  | -2.179241 |
| N                                                          | -2.907798 | -0.443544 | -0.397220 | C                                                          | -1.677625 | -0.079737 | -2.452711 |
| C                                                          | 3.801849  | -1.320930 | -0.283576 | H                                                          | -1.478875 | -0.504689 | -3.445228 |
| C                                                          | 3.346331  | -2.204422 | -1.298276 | C                                                          | -2.486055 | -0.862924 | -1.605473 |
| C                                                          | 4.302129  | -2.954760 | -2.013376 | C                                                          | -2.900789 | -2.234586 | -2.102712 |
| H                                                          | 3.963827  | -3.644999 | -2.802783 | H                                                          | -3.989099 | -2.272339 | -2.315235 |
| C                                                          | 5.670119  | -2.836050 | -1.738969 | H                                                          | -2.712572 | -3.005432 | -1.328513 |
| H                                                          | 6.402180  | -3.431411 | -2.306961 | H                                                          | -2.354226 | -2.506665 | -3.024861 |
| C                                                          | 6.106720  | -1.949779 | -0.742303 | C                                                          | -0.196759 | 1.733180  | -3.303337 |
| H                                                          | 7.184286  | -1.852099 | -0.539374 | H                                                          | 0.882444  | 1.726269  | -3.028417 |
| C                                                          | 5.191101  | -1.178476 | -0.002864 | H                                                          | -0.473958 | 2.783800  | -3.525281 |
| C                                                          | 1.865100  | -2.333595 | -1.638092 | H                                                          | -0.315649 | 1.136820  | -4.226133 |
| H                                                          | 1.301901  | -1.718285 | -0.906406 | C                                                          | -3.764891 | -1.279998 | 0.382317  |
| C                                                          | 1.363287  | -3.782799 | -1.508067 | C                                                          | -3.229731 | -1.953289 | 1.517367  |
| H                                                          | 1.545006  | -4.185758 | -0.490678 | C                                                          | -4.095162 | -2.764440 | 2.277960  |
| H                                                          | 1.866567  | -4.457774 | -2.232262 | H                                                          | -3.702696 | -3.305292 | 3.151467  |
| H                                                          | 0.272340  | -3.836513 | -1.704101 | C                                                          | -5.451697 | -2.890089 | 1.946484  |
| C                                                          | 1.573732  | -1.761068 | -3.037810 | H                                                          | -6.109389 | -3.533012 | 2.552354  |
| H                                                          | 1.891415  | -0.699560 | -3.101631 | C                                                          | -5.974552 | -2.176137 | 0.859489  |
| H                                                          | 0.487727  | -1.806534 | -3.258095 | H                                                          | -7.048000 | -2.251391 | 0.627474  |
| H                                                          | 2.114553  | -2.324978 | -3.827260 | C                                                          | -5.150903 | -1.353011 | 0.068104  |
| C                                                          | 5.675447  | -0.161052 | 1.027495  | C                                                          | -1.755817 | -1.798727 | 1.888319  |
| H                                                          | 4.842509  | 0.017422  | 1.738778  | H                                                          | -1.486507 | -0.732837 | 1.695948  |
| C                                                          | 6.883374  | -0.646846 | 1.845344  | C                                                          | -0.841057 | -2.646616 | 0.987036  |
| H                                                          | 6.689101  | -1.633766 | 2.314369  | H                                                          | -0.930584 | -2.350397 | -0.074680 |
| H                                                          | 7.119105  | 0.076835  | 2.652926  | H                                                          | -1.089350 | -3.725853 | 1.069881  |
| H                                                          | 7.796644  | -0.744982 | 1.221367  | H                                                          | 0.218965  | -2.508049 | 1.278659  |
| C                                                          | 5.971739  | 1.186312  | 0.337129  | C                                                          | -1.467488 | -2.070940 | 3.370356  |
| H                                                          | 5.078611  | 1.563226  | -0.207994 | H                                                          | -0.415489 | -1.808319 | 3.598564  |
| H                                                          | 6.788714  | 1.075981  | -0.406943 | H                                                          | -1.600607 | -3.142613 | 3.630172  |
| H                                                          | 6.274971  | 1.957301  | 1.076685  | H                                                          | -2.125883 | -1.472737 | 4.032882  |
| C                                                          | 2.438952  | -0.875969 | 1.638439  | C                                                          | -5.745632 | -0.482583 | -1.036554 |
| C                                                          | 1.573923  | -0.097688 | 2.431041  | H                                                          | -4.935315 | -0.246089 | -1.756162 |
| H                                                          | 1.366458  | -0.495604 | 3.432808  | C                                                          | -6.214708 | 0.860387  | -0.438048 |
| C                                                          | 0.921302  | 1.121771  | 2.112077  | H                                                          | -5.381172 | 1.379432  | 0.082836  |
| C                                                          | 0.050126  | 1.708042  | 3.210401  | H                                                          | -7.021247 | 0.698250  | 0.307877  |
| H                                                          | -1.019974 | 1.724717  | 2.900191  | H                                                          | -6.602488 | 1.536832  | -1.228897 |
| H                                                          | 0.337022  | 2.752781  | 3.448107  | C                                                          | -6.874167 | -1.170020 | -1.822013 |
| H                                                          | 0.127037  | 1.106598  | 4.134261  | H                                                          | -6.554117 | -2.154936 | -2.221536 |
| C                                                          | 2.914815  | -2.200221 | 2.201090  | H                                                          | -7.189497 | -0.538359 | -2.678117 |
| H                                                          | 2.692181  | -3.023762 | 1.491849  | H                                                          | -7.774804 | -1.338965 | -1.194880 |
| H                                                          | 2.435328  | -2.422000 | 3.172459  | H                                                          | -1.584083 | 4.287152  | -1.971830 |
| H                                                          | 4.016065  | -2.204907 | 2.335854  |                                                            |           |           |           |
| C                                                          | -1.143325 | 4.285978  | -0.952420 | <b>2-Cl<sub>2</sub></b>                                    |           |           |           |
| H                                                          | -2.001325 | 4.269381  | -0.241187 | Sum of electronic and thermal Free Energies = -4083.275153 |           |           |           |
| C                                                          | -0.283679 | 5.536244  | -0.721490 | <b>0 1</b>                                                 |           |           |           |
| H                                                          | 0.511992  | 5.580135  | -1.499763 | Ga                                                         | -0.005821 | -0.627218 | -0.551573 |
| H                                                          | -0.897584 | 6.453216  | -0.847897 | N                                                          | -1.471430 | -0.107161 | 0.623919  |
| C                                                          | 0.370924  | 5.511130  | 0.667987  | N                                                          | 1.466797  | -0.232771 | 0.655087  |
| H                                                          | 1.034330  | 6.391578  | 0.803804  | C                                                          | -1.287651 | -0.157374 | 1.958167  |
| H                                                          | -0.421212 | 5.590410  | 1.446993  | C                                                          | -0.025408 | -0.349764 | 2.571712  |





|   |           |           |           |
|---|-----------|-----------|-----------|
| C | 4.289290  | 2.204881  | -0.062957 |
| H | 4.511027  | 3.278921  | -0.156815 |
| C | 5.274405  | 1.265092  | -0.394991 |
| H | 6.263714  | 1.600998  | -0.743203 |
| C | 4.990429  | -0.101599 | -0.293922 |
| H | 5.760005  | -0.839377 | -0.570287 |
| C | 3.733891  | -0.558281 | 0.153006  |
| C | 1.966544  | 2.844589  | 0.746542  |
| H | 0.985572  | 2.327395  | 0.761627  |
| C | 1.880307  | 3.968612  | -0.297760 |
| H | 1.069085  | 4.676696  | -0.032739 |
| H | 1.668594  | 3.558154  | -1.305595 |
| H | 2.818240  | 4.559569  | -0.352105 |
| C | 2.206306  | 3.415246  | 2.158862  |
| H | 3.201423  | 3.904245  | 2.225244  |
| H | 2.165411  | 2.625535  | 2.934741  |
| H | 1.435703  | 4.172752  | 2.412317  |
| C | 3.458163  | -2.053567 | 0.208371  |
| H | 2.455386  | -2.195691 | 0.660380  |
| C | 3.403062  | -2.635891 | -1.217538 |
| H | 2.660913  | -2.097620 | -1.840928 |
| H | 3.110021  | -3.705597 | -1.193484 |
| H | 4.391198  | -2.556542 | -1.718917 |
| C | 4.474687  | -2.809641 | 1.083271  |
| H | 5.498876  | -2.768317 | 0.655928  |
| H | 4.191950  | -3.879589 | 1.165956  |
| H | 4.526585  | -2.389314 | 2.109313  |
| I | 0.229351  | 0.716040  | -2.439817 |
| I | -0.190502 | -3.003512 | -0.287655 |

**2**

Sum of electronic and thermal Free Energies = -3162.925059

**0 1**

|    |           |           |           |
|----|-----------|-----------|-----------|
| Ga | -0.003033 | -0.203043 | -1.018400 |
| N  | -1.448068 | -0.135590 | 0.528499  |
| N  | 1.431285  | -0.216790 | 0.531796  |
| C  | -1.285813 | -0.246372 | 1.856830  |
| C  | -0.018902 | -0.361962 | 2.474128  |
| H  | -0.022559 | -0.452463 | 3.568532  |
| C  | 1.252006  | -0.304136 | 1.861672  |
| C  | -2.506498 | -0.250102 | 2.757485  |
| H  | -3.193069 | 0.582083  | 2.503568  |
| H  | -2.220483 | -0.174035 | 3.822999  |
| H  | -3.090156 | -1.184032 | 2.618124  |
| C  | 2.470997  | -0.318315 | 2.761406  |
| H  | 3.164185  | -1.134867 | 2.473001  |
| H  | 2.190348  | -0.440238 | 3.823946  |
| H  | 3.047049  | 0.623666  | 2.649439  |
| C  | -2.753827 | 0.071421  | -0.011537 |
| C  | -3.623213 | -1.033428 | -0.222161 |
| C  | -4.892979 | -0.787285 | -0.778693 |
| H  | -5.583842 | -1.628452 | -0.943872 |
| C  | -5.287194 | 0.509951  | -1.136265 |
| H  | -6.286018 | 0.683817  | -1.566388 |
| C  | -4.399274 | 1.582493  | -0.969233 |
| H  | -4.706497 | 2.591871  | -1.281460 |
| C  | -3.117596 | 1.386901  | -0.418654 |
| C  | -3.153122 | -2.457062 | 0.064388  |
| H  | -2.327852 | -2.394946 | 0.803518  |
| C  | -4.247884 | -3.354473 | 0.664088  |

|   |           |           |           |
|---|-----------|-----------|-----------|
| H | -4.702243 | -2.897222 | 1.567702  |
| H | -3.826611 | -4.339891 | 0.952069  |
| H | -5.066588 | -3.550629 | -0.059910 |
| C | -2.557219 | -3.075842 | -1.217632 |
| H | -3.327903 | -3.151756 | -2.013500 |
| H | -2.157518 | -4.093329 | -1.022064 |
| H | -1.729682 | -2.450561 | -1.616863 |
| C | -2.136263 | 2.546110  | -0.253397 |
| H | -1.116353 | 2.115588  | -0.376575 |
| C | -2.190954 | 3.148694  | 1.164328  |
| H | -3.205778 | 3.542115  | 1.386444  |
| H | -1.468865 | 3.986603  | 1.262194  |
| H | -1.937397 | 2.397996  | 1.937885  |
| C | -2.294945 | 3.634134  | -1.325039 |
| H | -2.277349 | 3.201411  | -2.345942 |
| H | -1.466730 | 4.368518  | -1.249321 |
| H | -3.242967 | 4.200840  | -1.207906 |
| C | 2.752908  | -0.049481 | 0.010004  |
| C | 3.255008  | 1.267612  | -0.182625 |
| C | 4.516767  | 1.421628  | -0.788617 |
| H | 4.918959  | 2.434122  | -0.950550 |
| C | 5.266752  | 0.307561  | -1.192165 |
| H | 6.250588  | 0.447163  | -1.666976 |
| C | 4.760981  | -0.984455 | -0.990248 |
| H | 5.354830  | -1.855455 | -1.309076 |
| C | 3.504406  | -1.188599 | -0.387437 |
| C | 2.426496  | 2.486664  | 0.216296  |
| H | 1.622618  | 2.132654  | 0.894383  |
| C | 1.738421  | 3.099792  | -1.020004 |
| H | 1.087820  | 3.952611  | -0.733031 |
| H | 1.109442  | 2.346936  | -1.543059 |
| H | 2.488448  | 3.466976  | -1.752216 |
| C | 3.245166  | 3.540373  | 0.982248  |
| H | 4.026644  | 4.003646  | 0.343717  |
| H | 3.752134  | 3.098384  | 1.864850  |
| H | 2.586696  | 4.359475  | 1.339318  |
| C | 2.946216  | -2.596667 | -0.202392 |
| H | 2.103955  | -2.522749 | 0.516882  |
| C | 2.365336  | -3.125480 | -1.529537 |
| H | 1.578306  | -2.445237 | -1.920384 |
| H | 1.916252  | -4.132342 | -1.395932 |
| H | 3.155692  | -3.199280 | -2.306410 |
| C | 3.977617  | -3.573711 | 0.388609  |
| H | 4.818610  | -3.762255 | -0.311563 |
| H | 3.505068  | -4.554859 | 0.603038  |
| H | 4.409961  | -3.186662 | 1.334630  |

**2-Al(C6F5)3 (2-Al)**

Sum of electronic and thermal Free Energies = -5587.176296

**0 1**

|    |           |           |           |
|----|-----------|-----------|-----------|
| Ga | -0.026837 | 0.834865  | 0.826287  |
| Al | 0.082340  | -1.028522 | -0.839090 |
| F  | -2.184666 | -3.427185 | -0.901134 |
| F  | -4.790886 | -3.296788 | -1.644578 |
| F  | -5.797683 | -0.984243 | -2.728964 |
| F  | -4.187903 | 1.205077  | -3.051347 |
| F  | -1.597770 | 1.128658  | -2.161405 |
| F  | -0.085673 | -0.498489 | -4.050500 |
| F  | 1.863030  | 0.162565  | -5.813186 |
| F  | 4.467127  | 0.351929  | -4.979490 |



|   |           |           |           |                                                            |           |           |           |
|---|-----------|-----------|-----------|------------------------------------------------------------|-----------|-----------|-----------|
| C | -3.622866 | 0.423468  | 1.483421  | H                                                          | 2.797019  | 4.150500  | 2.537303  |
| C | 0.684833  | -1.556785 | 2.217778  | H                                                          | 1.539173  | 5.382971  | 2.199936  |
| C | -2.192390 | -2.564740 | -0.440607 | C                                                          | -2.899973 | 4.559165  | -0.482026 |
| C | -2.908846 | 1.425064  | 0.778309  | H                                                          | -2.539340 | 4.620500  | 0.561612  |
| C | 3.600327  | -1.067661 | -2.242388 | H                                                          | -3.979213 | 4.820829  | -0.489263 |
| B | 0.099704  | -1.118926 | -0.378145 | H                                                          | -2.357382 | 5.333151  | -1.064040 |
| C | 0.626051  | -2.005690 | 0.895095  | C                                                          | 1.499069  | 2.175562  | -3.421198 |
| C | 3.598924  | 1.555676  | 2.568188  | H                                                          | 1.862875  | 1.134007  | -3.508796 |
| H | 2.578305  | 1.820413  | 2.912202  | H                                                          | 2.190884  | 2.834907  | -3.986421 |
| C | -1.478569 | 2.862717  | 2.070288  | H                                                          | 0.508562  | 2.231728  | -3.915014 |
| C | 1.377065  | 2.602211  | -1.953441 | C                                                          | 4.935199  | 1.789099  | 0.420853  |
| H | 0.554566  | 1.972545  | -1.530508 | H                                                          | 5.836180  | 1.549402  | 1.006473  |
| C | 0.969053  | 3.366707  | 1.658701  | C                                                          | 1.601456  | -4.115791 | 1.745524  |
| C | -2.083377 | -0.587927 | -1.730251 | C                                                          | -2.767053 | -1.668951 | 2.670828  |
| C | 2.629649  | 2.326562  | -1.124149 | H                                                          | -1.940257 | -1.844113 | 1.962989  |
| C | 2.565053  | -0.981417 | -1.300295 | H                                                          | -3.634996 | -2.263418 | 2.316438  |
| C | -1.428670 | -1.451490 | -0.834236 | H                                                          | -2.455768 | -2.076226 | 3.655109  |
| C | -4.885421 | 0.042648  | 0.984222  | C                                                          | 3.692172  | 1.874703  | 1.076251  |
| H | -5.449625 | -0.751727 | 1.497530  | C                                                          | 3.279549  | -1.348027 | -3.580124 |
| C | -3.110113 | -0.175768 | 2.791298  | C                                                          | 1.198720  | -1.168444 | -1.587854 |
| H | -2.170884 | 0.352181  | 3.054230  | C                                                          | -2.968937 | 3.217427  | -2.613850 |
| C | 3.896276  | 2.224975  | -1.728837 | H                                                          | -2.867369 | 2.223733  | -3.085280 |
| H | 3.987662  | 2.332801  | -2.818967 | H                                                          | -2.265042 | 3.916093  | -3.111844 |
| C | 1.167899  | -2.303276 | 3.301251  | H                                                          | -3.992622 | 3.595717  | -2.818588 |
| C | -0.275011 | 3.555829  | 2.297056  | C                                                          | 0.926477  | 4.071372  | -1.836864 |
| H | -0.340045 | 4.418695  | 2.972407  | H                                                          | 0.679189  | 4.350184  | -0.793993 |
| C | 4.611859  | 2.354012  | 3.411346  | H                                                          | 0.024436  | 4.252827  | -2.456380 |
| H | 4.542865  | 3.447317  | 3.233594  | H                                                          | 1.729292  | 4.750203  | -2.193221 |
| H | 5.655187  | 2.050977  | 3.184184  |                                                            |           |           |           |
| H | 4.445260  | 2.170967  | 4.492924  |                                                            |           |           |           |
| C | -3.523379 | -2.773892 | -0.848513 | <b>1-B</b>                                                 |           |           |           |
| C | -5.443791 | 0.672839  | -0.134374 | Sum of electronic and thermal Free Energies = -7832.881965 |           |           |           |
| H | -6.431694 | 0.361081  | -0.505876 | O 1                                                        |           |           |           |
| C | 3.773468  | 0.043269  | 2.819639  | Ga                                                         | -0.400984 | -0.006973 | -0.842613 |
| H | 3.066626  | -0.552770 | 2.216325  | Ga                                                         | 1.988475  | -0.910210 | -0.323041 |
| H | 3.605287  | -0.195911 | 3.889843  | B                                                          | -1.819602 | -0.240274 | 0.836801  |
| H | 4.797207  | -0.288712 | 2.547234  | F                                                          | -2.094366 | 0.940070  | 3.657686  |
| C | -3.376562 | -0.786223 | -2.220473 | F                                                          | -0.611198 | 0.295183  | 5.766992  |
| C | 0.937094  | -1.492064 | -2.936292 | F                                                          | 1.253122  | -1.710226 | 5.635576  |
| C | 1.636807  | -3.603163 | 3.056277  | F                                                          | 1.597477  | -3.072223 | 3.237591  |
| C | -4.118464 | -1.882118 | -1.750269 | F                                                          | 0.158724  | -2.417399 | 1.109864  |
| C | 1.104666  | -3.316352 | 0.702785  | F                                                          | -2.937435 | -0.859139 | -1.861144 |
| C | 5.042954  | 1.973378  | -0.962657 | F                                                          | -4.681213 | -2.783000 | -2.473584 |
| H | 6.023551  | 1.890816  | -1.454906 | F                                                          | -5.636926 | -4.482388 | -0.522225 |
| C | -3.451111 | 2.072953  | -0.369695 | F                                                          | -4.791773 | -4.155886 | 2.077126  |
| C | -4.738351 | 1.691580  | -0.791703 | F                                                          | -3.091945 | -2.212685 | 2.727616  |
| H | -5.184282 | 2.175219  | -1.672038 | F                                                          | -4.736578 | 0.664909  | 0.368794  |
| C | -2.673241 | 3.165968  | -1.106126 | F                                                          | -5.632054 | 3.155580  | 0.775524  |
| H | -1.594742 | 2.928950  | -0.984131 | F                                                          | -3.929216 | 5.154722  | 1.573491  |
| C | 1.936716  | -1.566012 | -3.925903 | F                                                          | -1.271043 | 4.574719  | 2.028743  |
| C | -4.122124 | 0.052544  | 3.933898  | F                                                          | -0.345034 | 2.082686  | 1.574155  |
| H | -4.428593 | 1.115540  | 4.013485  | N                                                          | -0.044262 | -1.376320 | -2.319661 |
| H | -3.685871 | -0.256811 | 4.906343  | N                                                          | -0.267112 | 1.562241  | -2.108820 |
| H | -5.044667 | -0.545145 | 3.779574  | N                                                          | 2.191305  | -2.822133 | -1.060345 |
| C | -2.702187 | 3.321562  | 2.831037  | N                                                          | 3.917012  | -0.727171 | 0.162021  |
| H | -3.607083 | 3.338625  | 2.194744  | C                                                          | 0.573852  | -1.081982 | -3.465770 |
| H | -2.544888 | 4.321343  | 3.275049  | C                                                          | 0.779895  | 0.251789  | -3.893552 |
| H | -2.906614 | 2.606047  | 3.655139  | H                                                          | 1.286713  | 0.362426  | -4.860701 |
| C | 2.005656  | 4.454283  | 1.823639  | C                                                          | 0.334157  | 1.458784  | -3.313434 |
| H | 2.514617  | 4.659895  | 0.861294  | C                                                          | 1.161185  | -2.151079 | -4.367872 |
|   |           |           |           | H                                                          | 0.521777  | -3.047840 | -4.446958 |

|   |           |           |           |                                               |              |           |           |
|---|-----------|-----------|-----------|-----------------------------------------------|--------------|-----------|-----------|
| H | 2.147492  | -2.469118 | -3.967110 | H                                             | -4.834971    | 3.411032  | -3.100304 |
| H | 1.328727  | -1.751610 | -5.385104 | H                                             | -4.882634    | 2.788941  | -1.422101 |
| C | 0.551318  | 2.710402  | -4.138516 | H                                             | -5.210980    | 1.692785  | -2.787239 |
| H | 0.836576  | 2.453160  | -5.174629 | C                                             | 4.397383     | 0.576733  | 0.534881  |
| H | 1.357377  | 3.329467  | -3.696874 | C                                             | 4.175197     | 1.080233  | 1.843084  |
| H | -0.354414 | 3.345624  | -4.156208 | C                                             | 4.810048     | 2.289034  | 2.196472  |
| C | 3.397638  | -3.410230 | -1.191607 | H                                             | 4.674897     | 2.692431  | 3.209652  |
| C | 4.588515  | -2.932948 | -0.591900 | C                                             | 5.589003     | 2.999625  | 1.275109  |
| H | 5.457336  | -3.597992 | -0.683333 | H                                             | 6.073186     | 3.941760  | 1.575327  |
| C | 4.840238  | -1.710556 | 0.052473  | C                                             | 5.718971     | 2.532771  | -0.041264 |
| C | 3.571004  | -4.655413 | -2.048054 | H                                             | 6.297933     | 3.120368  | -0.768303 |
| H | 3.264047  | -4.445009 | -3.094842 | C                                             | 5.128587     | 1.318551  | -0.438492 |
| H | 2.961594  | -5.512821 | -1.704588 | C                                             | 3.285883     | 0.341451  | 2.841478  |
| H | 4.630174  | -4.968490 | -2.063802 | H                                             | 2.452998     | -0.112186 | 2.253108  |
| C | 6.238762  | -1.477679 | 0.585577  | C                                             | 4.035723     | -0.810402 | 3.540223  |
| H | 6.805149  | -0.777599 | -0.062524 | H                                             | 4.365862     | -1.583313 | 2.819376  |
| H | 6.798366  | -2.429631 | 0.642995  | H                                             | 3.382896     | -1.308281 | 4.283713  |
| H | 6.205349  | -1.010132 | 1.588809  | H                                             | 4.930609     | -0.425520 | 4.073629  |
| C | -0.254275 | -2.734274 | -1.811595 | C                                             | 2.643204     | 1.284838  | 3.870099  |
| H | -0.705708 | -2.578447 | -0.812006 | H                                             | 2.071741     | 2.097215  | 3.378556  |
| C | 1.027684  | -3.580849 | -1.579142 | H                                             | 3.400840     | 1.744066  | 4.538750  |
| H | 1.312549  | -4.007394 | -2.563496 | H                                             | 1.946410     | 0.726213  | 4.521771  |
| C | 0.632010  | -4.775254 | -0.672219 | C                                             | 5.245131     | 0.812099  | -1.876899 |
| H | 1.522388  | -5.389618 | -0.431232 | H                                             | 5.355647     | -0.292353 | -1.840375 |
| H | 0.263532  | -4.382404 | 0.294073  | C                                             | 6.465643     | 1.359976  | -2.631753 |
| C | -0.447561 | -5.637014 | -1.345189 | H                                             | 6.555689     | 0.866464  | -3.621069 |
| H | -0.731784 | -6.474150 | -0.673312 | H                                             | 7.408917     | 1.184456  | -2.074429 |
| H | -0.026338 | -6.102758 | -2.266188 | H                                             | 6.380544     | 2.450742  | -2.820658 |
| C | -1.681781 | -4.801839 | -1.715380 | C                                             | 3.948594     | 1.097782  | -2.658693 |
| H | -2.168085 | -4.439840 | -0.783152 | H                                             | 3.984707     | 0.653206  | -3.674563 |
| H | -2.437492 | -5.420166 | -2.243361 | H                                             | 3.782142     | 2.189271  | -2.763535 |
| C | -1.293164 | -3.587954 | -2.571557 | H                                             | 3.052918     | 0.679693  | -2.152074 |
| H | -2.173968 | -2.962369 | -2.806509 | C                                             | -0.978587    | -0.618538 | 2.201231  |
| H | -0.886742 | -3.939912 | -3.544636 | C                                             | -1.160746    | -0.011153 | 3.464452  |
| C | -0.764026 | 2.862782  | -1.727258 | C                                             | -0.431018    | -0.365430 | 4.613373  |
| C | 0.130212  | 3.819714  | -1.177165 | C                                             | 0.514093     | -1.401916 | 4.557662  |
| C | -0.381035 | 5.085706  | -0.825782 | C                                             | 0.700874     | -2.074438 | 3.344489  |
| H | 0.292733  | 5.830956  | -0.376129 | C                                             | -0.047443    | -1.664651 | 2.233093  |
| C | -1.723929 | 5.409007  | -1.037953 | C                                             | -2.875614    | -1.433307 | 0.462532  |
| H | -2.109026 | 6.397797  | -0.745915 | C                                             | -3.370926    | -1.642330 | -0.836412 |
| C | -2.586946 | 4.461282  | -1.606876 | C                                             | -4.295565    | -2.632082 | -1.193893 |
| H | -3.641563 | 4.726308  | -1.764203 | C                                             | -4.772520    | -3.508830 | -0.206885 |
| C | -2.137286 | 3.175860  | -1.963348 | C                                             | -4.326996    | -3.346056 | 1.114012  |
| C | 1.622491  | 3.548245  | -1.000717 | C                                             | -3.410266    | -2.320826 | 1.421067  |
| H | 1.856006  | 2.596730  | -1.517809 | C                                             | -2.477654    | 1.244964  | 0.945914  |
| C | 2.031396  | 3.367141  | 0.470615  | C                                             | -3.829108    | 1.585228  | 0.766509  |
| H | 1.684853  | 2.397539  | 0.866730  | C                                             | -4.332338    | 2.879915  | 0.994901  |
| H | 1.604116  | 4.165318  | 1.111746  | C                                             | -3.469900    | 3.906768  | 1.402459  |
| H | 3.132150  | 3.399298  | 0.561519  | C                                             | -2.112316    | 3.616021  | 1.608180  |
| C | 2.484751  | 4.655265  | -1.642317 | C                                             | -1.662103    | 2.319717  | 1.348185  |
| H | 2.191994  | 4.869320  | -2.691240 |                                               |              |           |           |
| H | 3.554402  | 4.357951  | -1.631263 |                                               |              |           |           |
| H | 2.406475  | 5.608281  | -1.078538 |                                               |              |           |           |
| C | -3.098474 | 2.159378  | -2.581720 |                                               |              |           |           |
| H | -2.952816 | 1.217101  | -2.019145 |                                               |              |           |           |
| C | -2.806893 | 1.852124  | -4.067754 |                                               |              |           |           |
| H | -3.584138 | 1.166334  | -4.463687 |                                               |              |           |           |
| H | -1.832360 | 1.356537  | -4.227983 |                                               |              |           |           |
| H | -2.836093 | 2.780705  | -4.676995 |                                               |              |           |           |
| C | -4.581369 | 2.542649  | -2.455195 |                                               |              |           |           |
|   |           |           |           | <b>1-Al</b>                                   |              |           |           |
|   |           |           |           | Sum of electronic and thermal Free Energies = | -8050.472952 |           |           |
|   |           |           |           | 0 1                                           |              |           |           |
|   |           |           |           | Ga                                            | -0.178870    | 0.266592  | -1.035147 |
|   |           |           |           | Ga                                            | 2.138744     | -0.788383 | -0.568562 |
|   |           |           |           | Al                                            | -1.833280    | -0.260075 | 0.804354  |
|   |           |           |           | F                                             | -2.322243    | -0.005827 | 3.958274  |
|   |           |           |           | F                                             | -1.190752    | -1.259078 | 6.073429  |
|   |           |           |           | F                                             | 0.856650     | -3.049564 | 5.687869  |

|   |           |           |           |   |           |           |           |
|---|-----------|-----------|-----------|---|-----------|-----------|-----------|
| F | 1.737710  | -3.592474 | 3.134876  | C | -1.679051 | 5.422458  | -0.448301 |
| F | 0.633695  | -2.350298 | 1.025899  | H | -2.143940 | 6.306520  | 0.013932  |
| F | -3.294146 | -0.547962 | -1.984080 | C | -2.452559 | 4.559234  | -1.238866 |
| F | -4.991946 | -2.391779 | -2.982431 | H | -3.517238 | 4.783464  | -1.397398 |
| F | -5.806346 | -4.506222 | -1.421838 | C | -1.894873 | 3.403197  | -1.816262 |
| F | -4.892761 | -4.738673 | 1.154764  | C | 1.741504  | 3.678175  | -0.491925 |
| F | -3.185450 | -2.908232 | 2.166372  | H | 2.071570  | 2.934790  | -1.243578 |
| F | -4.837207 | 1.036349  | 0.405248  | C | 1.903452  | 3.007158  | 0.879717  |
| F | -5.686682 | 3.568420  | 0.877391  | H | 1.368365  | 2.037971  | 0.911586  |
| F | -4.002511 | 5.395968  | 2.040006  | H | 1.486094  | 3.639188  | 1.689674  |
| F | -1.451411 | 4.664111  | 2.748523  | H | 2.971268  | 2.817302  | 1.091834  |
| F | -0.591185 | 2.124191  | 2.265922  | C | 2.662579  | 4.902946  | -0.618617 |
| N | 0.121718  | -0.945808 | -2.623918 | H | 2.546064  | 5.408948  | -1.599868 |
| N | 0.046990  | 1.927840  | -2.110993 | H | 3.722735  | 4.593438  | -0.506163 |
| N | 2.280748  | -2.606333 | -1.501980 | H | 2.459458  | 5.655165  | 0.172085  |
| N | 4.028889  | -0.792830 | 0.065272  | C | -2.721412 | 2.476872  | -2.705156 |
| C | 0.787404  | -0.569805 | -3.718317 | H | -2.417204 | 1.440382  | -2.450164 |
| C | 1.123782  | 0.786879  | -3.972877 | C | -2.412302 | 2.685436  | -4.204037 |
| H | 1.686811  | 0.968028  | -4.898056 | H | -3.068721 | 2.036968  | -4.820935 |
| C | 0.727726  | 1.949326  | -3.272045 | H | -1.367862 | 2.432224  | -4.464401 |
| C | 1.290032  | -1.575966 | -4.735504 | H | -2.599409 | 3.739515  | -4.500413 |
| H | 0.581332  | -2.408554 | -4.894103 | C | -4.236602 | 2.584104  | -2.483664 |
| H | 2.252902  | -2.007543 | -4.387373 | H | -4.637313 | 3.553117  | -2.850042 |
| H | 1.477917  | -1.086458 | -5.709161 | H | -4.520392 | 2.474497  | -1.422775 |
| C | 1.094592  | 3.288095  | -3.876152 | H | -4.752307 | 1.780354  | -3.046328 |
| H | 1.431474  | 3.177818  | -4.923041 | C | 4.491524  | 0.404125  | 0.712930  |
| H | 1.914707  | 3.754009  | -3.290639 | C | 4.168529  | 0.651724  | 2.071284  |
| H | 0.242962  | 3.994415  | -3.836677 | C | 4.724685  | 1.793188  | 2.686148  |
| C | 3.463064  | -3.231536 | -1.674499 | H | 4.502416  | 1.995002  | 3.744412  |
| C | 4.658413  | -2.876099 | -1.003697 | C | 5.527409  | 2.686326  | 1.967580  |
| H | 5.508187  | -3.550664 | -1.171711 | H | 5.945836  | 3.574799  | 2.465201  |
| C | 4.923782  | -1.777869 | -0.166065 | C | 5.772017  | 2.466001  | 0.602927  |
| C | 3.591088  | -4.391061 | -2.649745 | H | 6.374826  | 3.192067  | 0.038024  |
| H | 3.286686  | -4.073409 | -3.669641 | C | 5.264706  | 1.327516  | -0.049793 |
| H | 2.952148  | -5.254646 | -2.381785 | C | 3.242816  | -0.268558 | 2.858396  |
| H | 4.637892  | -4.740050 | -2.701375 | H | 2.649595  | -0.848162 | 2.117248  |
| C | 6.298834  | -1.683861 | 0.459563  | C | 4.034134  | -1.290428 | 3.697986  |
| H | 6.894409  | -0.867265 | 0.002235  | H | 4.665508  | -1.941278 | 3.059921  |
| H | 6.853089  | -2.632835 | 0.339849  | H | 3.346684  | -1.947327 | 4.267230  |
| H | 6.220075  | -1.438767 | 1.537397  | H | 4.697322  | -0.772921 | 4.422994  |
| C | -0.148168 | -2.325075 | -2.211460 | C | 2.246636  | 0.519259  | 3.724776  |
| H | -0.549694 | -2.219669 | -1.175945 | H | 1.674997  | 1.254748  | 3.127779  |
| C | 1.084559  | -3.257574 | -2.081162 | H | 2.753948  | 1.060666  | 4.549951  |
| H | 1.338464  | -3.614864 | -3.101233 | H | 1.519392  | -0.171149 | 4.191145  |
| C | 0.629454  | -4.491839 | -1.261766 | C | 5.491533  | 1.107625  | -1.545298 |
| H | 1.485941  | -5.171865 | -1.080862 | H | 5.553643  | 0.013553  | -1.722938 |
| H | 0.299280  | -4.143817 | -0.262861 | C | 6.796717  | 1.725049  | -2.070843 |
| C | -0.509096 | -5.236299 | -1.975442 | H | 6.962547  | 1.428526  | -3.126816 |
| H | -0.825956 | -6.109805 | -1.367667 | H | 7.675664  | 1.394879  | -1.479485 |
| H | -0.132312 | -5.645685 | -2.941267 | H | 6.769843  | 2.834661  | -2.047030 |
| C | -1.702274 | -4.307608 | -2.240877 | C | 4.279334  | 1.617881  | -2.348849 |
| H | -2.147941 | -4.005974 | -1.268633 | H | 4.389053  | 1.393802  | -3.430141 |
| H | -2.501516 | -4.834800 | -2.802430 | H | 4.164840  | 2.714972  | -2.229719 |
| C | -1.268446 | -3.041880 | -2.993037 | H | 3.330531  | 1.148895  | -2.010779 |
| H | -2.114513 | -2.340553 | -3.121758 | C | -0.881210 | -1.091043 | 2.395723  |
| H | -0.919579 | -3.312093 | -4.013987 | C | -1.307194 | -0.860828 | 3.712955  |
| C | -0.517410 | 3.134354  | -1.568824 | C | -0.753628 | -1.512119 | 4.831752  |
| C | 0.279355  | 3.996780  | -0.774272 | C | 0.286285  | -2.441465 | 4.638828  |
| C | -0.326947 | 5.141637  | -0.219768 | C | 0.735681  | -2.717552 | 3.337384  |
| H | 0.267781  | 5.814933  | 0.415594  | C | 0.143962  | -2.025119 | 2.272879  |

|                                                            |           |           |           |   |           |           |           |
|------------------------------------------------------------|-----------|-----------|-----------|---|-----------|-----------|-----------|
| C                                                          | -3.152960 | -1.642400 | 0.134026  | H | -0.798594 | 4.637440  | -1.935958 |
| C                                                          | -3.675627 | -1.563931 | -1.161293 | C | 2.570304  | 3.722550  | -0.029220 |
| C                                                          | -4.567649 | -2.495993 | -1.711423 | H | 3.328547  | 3.737380  | 0.782759  |
| C                                                          | -4.972954 | -3.585294 | -0.920753 | H | 2.916766  | 2.976580  | -0.776053 |
| C                                                          | -4.493611 | -3.706502 | 0.395784  | C | 2.758655  | -2.027566 | -0.190219 |
| C                                                          | -3.598695 | -2.737588 | 0.890300  | C | 4.159171  | -1.967252 | -0.441940 |
| C                                                          | -2.668906 | 1.493308  | 1.297603  | C | 4.719809  | -2.935242 | -1.297348 |
| C                                                          | -3.971955 | 1.898233  | 0.994610  | H | 5.800612  | -2.902545 | -1.507701 |
| C                                                          | -4.448131 | 3.197303  | 1.245655  | C | 3.929467  | -3.921346 | -1.902958 |
| C                                                          | -3.588888 | 4.135077  | 1.842200  | H | 4.389157  | -4.660715 | -2.577400 |
| C                                                          | -2.280246 | 3.763109  | 2.194717  | C | 2.552068  | -3.958280 | -1.652098 |
| C                                                          | -1.862956 | 2.455680  | 1.914658  | H | 1.931203  | -4.731856 | -2.130819 |
| <b>1-Cl<sub>2</sub></b>                                    |           |           |           | C | 1.943147  | -3.021970 | -0.794281 |
| Sum of electronic and thermal Free Energies = -6546.584080 |           |           |           | C | 5.059182  | -0.878400 | 0.141156  |
| O 1                                                        |           |           |           | H | 4.442901  | -0.250835 | 0.817008  |
| Ga                                                         | 1.104367  | 0.357266  | -0.363113 | C | 6.219407  | -1.470834 | 0.966538  |
| Ga                                                         | -1.247529 | 0.779038  | -0.720002 | H | 5.864682  | -2.164556 | 1.756933  |
| Cl                                                         | 2.304229  | 0.776233  | -2.213970 | H | 6.801752  | -0.663295 | 1.457434  |
| Cl                                                         | -1.962351 | 1.066008  | -2.820024 | H | 6.921669  | -2.041019 | 0.322641  |
| N                                                          | 1.404450  | 1.817504  | 0.997637  | C | 5.603653  | 0.047414  | -0.965275 |
| N                                                          | 2.135940  | -1.005372 | 0.601386  | H | 6.257878  | -0.512562 | -1.666857 |
| N                                                          | -1.146643 | 2.665995  | -0.057662 | H | 6.208614  | 0.866967  | -0.522467 |
| N                                                          | -2.792272 | 0.234326  | 0.370991  | H | 4.774053  | 0.491603  | -1.548348 |
| C                                                          | 1.634520  | 1.501939  | 2.274402  | C | 0.442242  | -3.094741 | -0.535496 |
| C                                                          | 1.963936  | 0.188088  | 2.712128  | H | 0.202173  | -2.341778 | 0.244038  |
| H                                                          | 2.092987  | 0.070241  | 3.796109  | C | 0.029819  | -4.472379 | 0.013471  |
| C                                                          | 2.305896  | -0.941239 | 1.935064  | H | 0.214307  | -5.276898 | -0.729034 |
| C                                                          | 1.566491  | 2.574922  | 3.345306  | H | -1.050771 | -4.479389 | 0.257984  |
| H                                                          | 0.573830  | 3.071896  | 3.346122  | H | 0.597492  | -4.730927 | 0.931731  |
| H                                                          | 2.330228  | 3.362985  | 3.180602  | C | -0.374464 | -2.730154 | -1.790006 |
| H                                                          | 1.735412  | 2.139690  | 4.346846  | H | -0.240380 | -3.487480 | -2.591217 |
| C                                                          | 2.914441  | -2.132946 | 2.637118  | H | -0.071475 | -1.748806 | -2.208161 |
| H                                                          | 2.500826  | -3.079823 | 2.237486  | H | -1.455239 | -2.680632 | -1.543041 |
| H                                                          | 2.738939  | -2.082362 | 3.727664  | C | -3.109873 | -1.160854 | 0.492160  |
| H                                                          | 4.009370  | -2.168514 | 2.468523  | C | -2.491634 | -1.896687 | 1.547099  |
| C                                                          | -2.065718 | 3.211962  | 0.735117  | C | -2.858965 | -3.245779 | 1.713938  |
| C                                                          | -3.239800 | 2.511930  | 1.135805  | H | -2.411759 | -3.832915 | 2.528032  |
| H                                                          | -3.966765 | 3.105954  | 1.705393  | C | -3.775712 | -3.864537 | 0.850246  |
| C                                                          | -3.573420 | 1.150931  | 0.985091  | H | -4.046321 | -4.921369 | 1.001030  |
| C                                                          | -1.942209 | 4.629705  | 1.267214  | C | -4.322222 | -3.142944 | -0.215467 |
| H                                                          | -2.608575 | 4.771535  | 2.138300  | H | -5.017768 | -3.640105 | -0.909804 |
| H                                                          | -2.233744 | 5.369541  | 0.493529  | C | -4.005151 | -1.783224 | -0.418441 |
| H                                                          | -0.907449 | 4.866562  | 1.579229  | C | -1.443716 | -1.251148 | 2.458230  |
| C                                                          | -4.875511 | 0.683786  | 1.598763  | H | -0.789604 | -0.632400 | 1.800209  |
| H                                                          | -4.715281 | -0.182812 | 2.270677  | C | -0.548976 | -2.283751 | 3.157282  |
| H                                                          | -5.568069 | 0.336547  | 0.805815  | H | -1.114898 | -2.877649 | 3.905561  |
| H                                                          | -5.364265 | 1.496667  | 2.165865  | H | 0.262398  | -1.761869 | 3.698760  |
| C                                                          | 1.234177  | 3.205688  | 0.551659  | H | -0.087137 | -2.988701 | 2.439071  |
| H                                                          | 0.937981  | 3.850339  | 1.406940  | C | -2.037418 | -0.299363 | 3.517329  |
| C                                                          | 0.106443  | 3.287772  | -0.516364 | H | -2.763462 | -0.834238 | 4.165867  |
| H                                                          | 0.451496  | 2.634305  | -1.352237 | H | -2.543936 | 0.575357  | 3.069635  |
| C                                                          | 1.350960  | 5.076534  | -1.779444 | H | -1.224444 | 0.090163  | 4.165431  |
| H                                                          | 1.631368  | 4.346559  | -2.570721 | C | -4.615049 | -1.046393 | -1.607128 |
| H                                                          | 1.266094  | 6.068297  | -2.271384 | H | -4.269493 | 0.006659  | -1.569632 |
| C                                                          | 2.439452  | 5.097411  | -0.696070 | C | -4.104243 | -1.639745 | -2.934989 |
| H                                                          | 3.418074  | 5.396467  | -1.127569 | H | -4.405176 | -2.703671 | -3.044241 |
| H                                                          | 2.183499  | 5.869067  | 0.066945  | H | -3.001788 | -1.572609 | -3.002035 |
| C                                                          | 0.000505  | 4.678555  | -1.166678 | H | -4.520265 | -1.074789 | -3.794487 |
| H                                                          | -0.290073 | 5.453464  | -0.429628 | C | -6.156059 | -1.055872 | -1.569170 |
|                                                            |           |           |           | H | -6.561699 | -2.083966 | -1.679248 |

H -6.566449 -0.446082 -2.400574  
H -6.555293 -0.645017 -0.618694

**1-I<sub>2</sub>**  
Sum of electronic and thermal Free Energies = -6222.061856

O 1

|    |           |           |           |
|----|-----------|-----------|-----------|
| Ga | 1.079118  | 0.242318  | 0.112436  |
| Ga | -1.311973 | 0.619619  | -0.128505 |
| I  | 2.297498  | 1.075628  | -2.028021 |
| I  | -2.063983 | 1.579878  | -2.429117 |
| N  | 1.334571  | 1.416686  | 1.736723  |
| N  | 2.178801  | -1.242109 | 0.794031  |
| N  | -1.283701 | 2.318981  | 0.925893  |
| N  | -2.832487 | -0.210481 | 0.805178  |
| C  | 1.586308  | 0.860953  | 2.925936  |
| C  | 1.969409  | -0.498283 | 3.096664  |
| H  | 2.106058  | -0.822880 | 4.136623  |
| C  | 2.346935  | -1.440381 | 2.114280  |
| C  | 1.477603  | 1.693810  | 4.190044  |
| H  | 0.460390  | 2.126041  | 4.294452  |
| H  | 2.196889  | 2.538688  | 4.184653  |
| H  | 1.682723  | 1.076247  | 5.083066  |
| C  | 2.988561  | -2.729514 | 2.572850  |
| H  | 2.651168  | -3.582109 | 1.951547  |
| H  | 2.754906  | -2.929070 | 3.635184  |
| H  | 4.091137  | -2.676038 | 2.474422  |
| C  | -2.224690 | 2.651309  | 1.804461  |
| C  | -3.366792 | 1.832244  | 2.040691  |
| H  | -4.114980 | 2.260284  | 2.720961  |
| C  | -3.643459 | 0.521789  | 1.604648  |
| C  | -2.162765 | 3.933025  | 2.616820  |
| H  | -2.813426 | 3.853334  | 3.507613  |
| H  | -2.515090 | 4.797345  | 2.016876  |
| H  | -1.134516 | 4.160457  | 2.955603  |
| C  | -4.914993 | -0.122641 | 2.112268  |
| H  | -4.706044 | -1.098191 | 2.594837  |
| H  | -5.599734 | -0.335881 | 1.267287  |
| H  | -5.434454 | 0.533958  | 2.833518  |
| C  | 1.080961  | 2.855992  | 1.588603  |
| H  | 0.773252  | 3.291439  | 2.562975  |
| C  | -0.078309 | 3.089925  | 0.581487  |
| H  | 0.272004  | 2.638624  | -0.378386 |
| C  | 1.035760  | 5.157275  | -0.319194 |
| H  | 1.331575  | 4.612738  | -1.243213 |
| H  | 0.886865  | 6.219678  | -0.605008 |
| C  | 2.148993  | 5.027463  | 0.730826  |
| H  | 3.099080  | 5.460732  | 0.352924  |
| H  | 1.872166  | 5.617602  | 1.635475  |
| C  | -0.275942 | 4.572341  | 0.222640  |
| H  | -0.589684 | 5.169138  | 1.102338  |
| H  | -1.089517 | 4.634302  | -0.530046 |
| C  | 2.371437  | 3.558447  | 1.110816  |
| H  | 3.145018  | 3.456656  | 1.901809  |
| H  | 2.748323  | 3.000982  | 0.226103  |
| C  | 2.833240  | -2.055849 | -0.189175 |
| C  | 4.236604  | -1.922347 | -0.396560 |
| C  | 4.816035  | -2.631978 | -1.465972 |
| H  | 5.897703  | -2.533975 | -1.649533 |
| C  | 4.044373  | -3.438119 | -2.313221 |
| H  | 4.519026  | -3.970427 | -3.152293 |

|   |           |           |           |
|---|-----------|-----------|-----------|
| C | 2.667563  | -3.562454 | -2.089364 |
| H | 2.062341  | -4.200258 | -2.752702 |
| C | 2.039242  | -2.883306 | -1.028389 |
| C | 5.125960  | -1.026498 | 0.466033  |
| H | 4.500572  | -0.597701 | 1.275530  |
| C | 6.271942  | -1.826617 | 1.119886  |
| H | 5.905052  | -2.717362 | 1.670897  |
| H | 6.837140  | -1.190041 | 1.832283  |
| H | 6.992321  | -2.190559 | 0.357479  |
| C | 5.695570  | 0.159662  | -0.336362 |
| H | 6.346523  | -0.193035 | -1.164181 |
| H | 6.308151  | 0.813347  | 0.320053  |
| H | 4.882819  | 0.765131  | -0.782572 |
| C | 0.542029  | -3.059999 | -0.798422 |
| H | 0.275757  | -2.494599 | 0.119326  |
| C | 0.188800  | -4.536833 | -0.542362 |
| H | 0.407992  | -5.164453 | -1.431574 |
| H | -0.890181 | -4.638804 | -0.311488 |
| H | 0.768600  | -4.951864 | 0.308446  |
| C | -0.297777 | -2.481826 | -1.952418 |
| H | -0.141411 | -3.052761 | -2.891976 |
| H | -0.039565 | -1.423918 | -2.163539 |
| H | -1.376950 | -2.531659 | -1.699040 |
| C | -3.081970 | -1.617038 | 0.647569  |
| C | -2.417478 | -2.513971 | 1.536995  |
| C | -2.721397 | -3.885565 | 1.441626  |
| H | -2.235581 | -4.597407 | 2.123266  |
| C | -3.623399 | -4.367969 | 0.481268  |
| H | -3.845399 | -5.445262 | 0.426931  |
| C | -4.216351 | -3.480345 | -0.421615 |
| H | -4.899646 | -3.865538 | -1.194728 |
| C | -3.960738 | -2.094055 | -0.361651 |
| C | -1.388281 | -2.010364 | 2.552467  |
| H | -0.777248 | -1.238327 | 2.028263  |
| C | -0.431744 | -3.114578 | 3.021993  |
| H | -0.955613 | -3.879071 | 3.633436  |
| H | 0.357037  | -2.671952 | 3.658569  |
| H | 0.057271  | -3.630672 | 2.172931  |
| C | -2.010548 | -1.323995 | 3.785939  |
| H | -2.696442 | -2.016500 | 4.318662  |
| H | -2.569066 | -0.405681 | 3.527435  |
| H | -1.206820 | -1.029479 | 4.493020  |
| C | -4.617134 | -1.174776 | -1.386642 |
| H | -4.297537 | -0.135382 | -1.166098 |
| C | -4.127904 | -1.509964 | -2.809222 |
| H | -4.433079 | -2.535231 | -3.109533 |
| H | -3.025762 | -1.437112 | -2.883301 |
| H | -4.554147 | -0.795027 | -3.542529 |
| C | -6.156315 | -1.231237 | -1.324863 |
| H | -6.539038 | -2.235901 | -1.603801 |
| H | -6.597137 | -0.498246 | -2.031775 |
| H | -6.545902 | -1.000150 | -0.312065 |

**LAI**  
Sum of electronic and thermal Free Energies = -1480.417279

O 1

|    |           |           |           |
|----|-----------|-----------|-----------|
| Al | -0.010082 | -0.290894 | -1.044005 |
| N  | -1.422917 | -0.192222 | 0.419331  |
| N  | 1.394712  | -0.275521 | 0.427008  |
| C  | -1.286047 | -0.319791 | 1.754972  |



C -0.027756 -0.456830 2.381257  
H -0.033639 -0.564136 3.473929  
C 1.237862 -0.380479 1.763381  
C -2.514881 -0.307345 2.639995  
H -3.162653 0.562077 2.409382  
H -2.236775 -0.280306 3.709874  
H -3.136087 -1.209062 2.460766  
C 2.462782 -0.389136 2.650962  
H 3.168393 -1.187333 2.343213  
H 2.191042 -0.534228 3.712896  
H 3.020993 0.564697 2.551350  
C -2.737907 0.058014 -0.108323  
C -3.640873 -1.018500 -0.314327  
C -4.918432 -0.725973 -0.830573  
H -5.636290 -1.544649 -0.993526  
C -5.285660 0.588217 -1.149875  
H -6.290862 0.798534 -1.547685  
C -4.363626 1.632650 -0.988583  
H -4.651254 2.655156 -1.274268  
C -3.072618 1.391224 -0.479552  
C -3.212713 -2.462330 -0.065032  
H -2.342026 -2.440274 0.622746  
C -4.306898 -3.316464 0.597048  
H -4.686394 -2.847999 1.529239  
H -3.911613 -4.321047 0.853872  
H -5.175742 -3.471731 -0.076567  
C -2.724348 -3.095084 -1.385116  
H -3.544759 -3.128929 -2.132844  
H -2.362311 -4.131855 -1.219498  
H -1.893279 -2.503605 -1.827301  
C -2.047388 2.516086 -0.339057  
H -1.057051 2.064128 -0.587275  
C -1.947835 3.045191 1.104973  
H -2.925072 3.448685 1.445844  
H -1.199395 3.862992 1.168465  
H -1.635139 2.254466 1.814013  
C -2.265915 3.665688 -1.332259  
H -2.351089 3.291689 -2.372620  
H -1.410881 4.371222 -1.291157  
H -3.181202 4.250118 -1.098835  
C 2.724836 -0.068121 -0.085575  
C 3.193725 1.263818 -0.251583  
C 4.464998 1.458121 -0.825913  
H 4.843087 2.483035 -0.967041  
C 5.252672 0.369418 -1.225486  
H 6.243095 0.540530 -1.675669  
C 4.775394 -0.937351 -1.053881  
H 5.397203 -1.788651 -1.372791  
C 3.511021 -1.182413 -0.482824  
C 2.332689 2.462436 0.141030  
H 1.478919 2.078124 0.736585  
C 1.743662 3.137459 -1.113701  
H 1.074774 3.978762 -0.834737  
H 1.155666 2.411164 -1.715831  
H 2.547483 3.538373 -1.766867  
C 3.090695 3.471563 1.021891  
H 3.927363 3.953006 0.473104  
H 3.517934 2.985125 1.923229  
H 2.410177 4.280739 1.359895  
C 2.994499 -2.610324 -0.331592

H 2.096530 -2.567654 0.319670  
C 2.542446 -3.168749 -1.696033  
H 1.758531 -2.523797 -2.148223  
H 2.128518 -4.193623 -1.588141  
H 3.393501 -3.213815 -2.408358  
C 4.017375 -3.538476 0.348090  
H 4.921372 -3.686730 -0.279423  
H 3.574639 -4.540402 0.527191  
H 4.352241 -3.132085 1.325209

**LAI-I<sub>2</sub>**

Sum of electronic and thermal Free Energies = -2076.289460

O 1  
Al -0.016048 -0.468966 -0.188553  
N -1.460448 0.180763 0.886229  
N 1.436974 -0.007955 0.956093  
C -1.308152 0.128534 2.229526  
C -0.065165 -0.131159 2.859954  
H -0.101447 -0.235704 3.952029  
C 1.227759 -0.099498 2.290686  
C -2.506115 0.364326 3.116738  
H -3.082511 1.248945 2.781905  
H -2.201308 0.500666 4.169967  
H -3.200425 -0.498690 3.057916  
C 2.421022 -0.164187 3.212383  
H 2.967658 -1.115370 3.040141  
H 2.116219 -0.114170 4.273238  
H 3.142313 0.648538 2.998596  
C -2.731876 0.600849 0.331821  
C -3.809055 -0.318899 0.209466  
C -5.041128 0.159285 -0.283082  
H -5.884647 -0.542010 -0.379366  
C -5.208255 1.495261 -0.658975  
H -6.179892 1.847838 -1.038894  
C -4.125423 2.379288 -0.567805  
H -4.253795 3.424067 -0.884965  
C -2.873840 1.956368 -0.080812  
C -3.685542 -1.803595 0.532548  
H -2.675047 -1.983648 0.952966  
C -4.724749 -2.280966 1.565127  
H -4.688035 -1.690385 2.503935  
H -4.546566 -3.344613 1.826329  
H -5.759776 -2.205103 1.170431  
C -3.796519 -2.631774 -0.763927  
H -4.809476 -2.537433 -1.209761  
H -3.607564 -3.705761 -0.559478  
H -3.056813 -2.298693 -1.518162  
C -1.719884 2.948539 0.019888  
H -0.784761 2.370120 -0.130807  
C -1.643235 3.590209 1.419464  
H -2.594418 4.104181 1.673326  
H -0.828982 4.343264 1.459382  
H -1.437288 2.839471 2.207872  
C -1.762993 4.017932 -1.082079  
H -1.845492 3.552484 -2.084917  
H -0.836221 4.623464 -1.063973  
H -2.612894 4.720341 -0.951563  
C 2.738919 0.393047 0.469564  
C 3.002914 1.786254 0.351952  
C 4.275541 2.190784 -0.093739

|   |           |           |           |   |           |           |           |
|---|-----------|-----------|-----------|---|-----------|-----------|-----------|
| H | 4.498265  | 3.265113  | -0.182802 | C | -1.486410 | 2.858031  | 2.094380  |
| C | 5.259136  | 1.251708  | -0.431075 | C | 1.317807  | 2.607110  | -1.915647 |
| H | 6.248194  | 1.587593  | -0.779966 | H | 0.501359  | 1.972977  | -1.483527 |
| C | 4.973793  | -0.114491 | -0.331628 | C | 0.956974  | 3.360690  | 1.698584  |
| H | 5.742489  | -0.852704 | -0.609071 | C | -2.077057 | -0.560368 | -1.735531 |
| C | 3.717772  | -0.571397 | 0.117430  | C | 2.581509  | 2.327927  | -1.106014 |
| C | 1.959281  | 2.835452  | 0.720227  | C | 2.582776  | -0.967530 | -1.307191 |
| H | 0.979046  | 2.319276  | 0.767945  | C | -1.410574 | -1.414873 | -0.838651 |
| C | 1.850515  | 3.937349  | -0.345638 | C | -4.878952 | 0.043849  | 0.985872  |
| H | 1.052689  | 4.657766  | -0.073525 | H | -5.443544 | -0.752517 | 1.495418  |
| H | 1.607433  | 3.505859  | -1.337485 | C | -3.110360 | -0.182761 | 2.795649  |
| H | 2.791137  | 4.518726  | -0.440127 | H | -2.177306 | 0.349938  | 3.071091  |
| C | 2.231249  | 3.434491  | 2.114784  | C | 3.840384  | 2.234345  | -1.728083 |
| H | 3.224816  | 3.930008  | 2.147589  | H | 3.916364  | 2.345779  | -2.818935 |
| H | 2.214404  | 2.659314  | 2.906285  | C | 1.123317  | -2.128243 | 3.332022  |
| H | 1.462981  | 4.192786  | 2.373068  | C | -0.286267 | 3.550196  | 2.339657  |
| C | 3.449846  | -2.067968 | 0.179011  | H | -0.353818 | 4.408593  | 3.020395  |
| H | 2.452068  | -2.213883 | 0.640250  | C | 4.619782  | 2.359023  | 3.402545  |
| C | 3.385417  | -2.655013 | -1.244591 | H | 4.536582  | 3.451869  | 3.228728  |
| H | 2.635036  | -2.122915 | -1.863541 | H | 5.663069  | 2.068419  | 3.159810  |
| H | 3.098612  | -3.726294 | -1.214717 | H | 4.470471  | 2.171282  | 4.485831  |
| H | 4.368808  | -2.571664 | -1.754583 | C | -3.497665 | -2.753158 | -0.841268 |
| C | 4.476709  | -2.817207 | 1.047736  | C | -5.437042 | 0.679556  | -0.129236 |
| H | 5.497064  | -2.774789 | 0.611519  | H | -6.424829 | 0.369698  | -0.502463 |
| H | 4.197719  | -3.887591 | 1.136972  | C | 3.805571  | 0.039965  | 2.815033  |
| H | 4.536391  | -2.393018 | 2.071830  | H | 3.101767  | -0.565411 | 2.217401  |
| I | 0.200147  | 0.628512  | -2.430225 | H | 3.655217  | -0.204618 | 3.886709  |
| I | -0.186575 | -3.006618 | -0.258842 | H | 4.830825  | -0.274931 | 2.528853  |

#### LAl-B(C<sub>6</sub>F<sub>5</sub>)<sub>3</sub>

Sum of electronic and thermal Free Energies = -3687.109230

O 1

|    |           |           |           |   |           |           |           |
|----|-----------|-----------|-----------|---|-----------|-----------|-----------|
| Al | -0.045570 | 0.896246  | 0.530303  | C | 1.137415  | -3.253589 | 0.767757  |
| F  | -1.424711 | 0.548616  | -2.183170 | C | 4.997558  | 1.985912  | -0.977400 |
| F  | 0.249551  | -0.125881 | 2.424050  | H | 5.972192  | 1.908983  | -1.482071 |
| F  | -5.373451 | -2.051324 | -2.133684 | C | -3.442732 | 2.078180  | -0.359131 |
| F  | 1.153581  | -3.850044 | -0.435098 | C | -4.731275 | 1.701207  | -0.781191 |
| F  | -1.648171 | -3.478286 | 0.376124  | H | -5.177333 | 2.189827  | -1.658522 |
| F  | 2.967185  | -0.720249 | -0.031910 | C | -2.666375 | 3.173581  | -1.093417 |
| F  | -3.932366 | 0.067242  | -3.109890 | H | -1.588328 | 2.929342  | -0.984296 |
| F  | 1.137888  | -1.549212 | 4.541951  | C | 1.951422  | -1.524492 | -3.935617 |
| F  | 2.076575  | -5.244750 | 1.693417  | C | -4.132641 | 0.033016  | 3.931649  |
| F  | -4.188685 | -3.800852 | -0.362409 | H | -4.448758 | 1.093074  | 4.013453  |
| F  | -0.293704 | -1.730414 | -3.380151 | H | -3.700915 | -0.276868 | 4.905917  |
| N  | 1.225549  | 2.277547  | 0.936402  | H | -5.048931 | -0.571651 | 3.768369  |
| F  | 4.900367  | -0.890977 | -1.886950 | C | -2.720453 | 3.308991  | 2.839584  |
| N  | -1.578152 | 1.824650  | 1.218966  | H | -3.613487 | 3.339625  | 2.187299  |
| F  | 2.070473  | -4.131458 | 4.194422  | H | -2.567214 | 4.300722  | 3.302431  |
| F  | 1.628486  | -1.813833 | -5.205653 | H | -2.943842 | 2.580996  | 3.647661  |
| F  | 4.259476  | -1.393842 | -4.519036 | C | 1.997119  | 4.442389  | 1.861385  |
| C  | 2.519338  | 2.173278  | 0.305891  | H | 2.514984  | 4.636319  | 0.901426  |
| C  | -3.615835 | 0.421314  | 1.486597  | H | 2.781068  | 4.140158  | 2.583978  |
| C  | 0.664999  | -1.450054 | 2.197872  | H | 1.533199  | 5.376547  | 2.227139  |
| C  | -2.165623 | -2.533859 | -0.442941 | C | -2.879225 | 4.563744  | -0.457767 |
| C  | -2.899492 | 1.422778  | 0.783688  | H | -2.499529 | 4.619978  | 0.579440  |
| C  | 3.617715  | -1.053359 | -2.249250 | H | -3.957750 | 4.828103  | -0.444843 |
| B  | 0.114958  | -1.057208 | -0.386940 | H | -2.345422 | 5.339469  | -1.045503 |
| C  | 0.636011  | -1.943578 | 0.895418  | C | 1.418497  | 2.187150  | -3.386819 |
| C  | 3.605060  | 1.550490  | 2.570975  | H | 1.787790  | 1.148726  | -3.484655 |
| H  | 2.585955  | 1.800918  | 2.930710  | H | 2.096420  | 2.854781  | -3.959174 |

|   |           |           |           |   |            |             |             |
|---|-----------|-----------|-----------|---|------------|-------------|-------------|
| H | 0.419680  | 2.238251  | -3.863758 | H | 2.10165200 | -4.22946900 | -0.96536500 |
| C | 4.908259  | 1.798162  | 0.407012  | C | 2.09137600 | -4.85673300 | -3.06089800 |
| H | 5.817931  | 1.561528  | 0.980211  | H | 1.44756600 | -5.74191900 | -2.87238500 |
| C | 1.617050  | -3.998211 | 1.859319  | H | 2.83776800 | -5.16836600 | -3.82789400 |
| C | -2.758596 | -1.673556 | 2.669710  | C | 1.25430000 | -3.69135400 | -3.60482000 |
| H | -1.923672 | -1.841406 | 1.969535  | H | 0.44234000 | -3.46688800 | -2.88198900 |
| H | -3.619580 | -2.269106 | 2.300944  | H | 0.75737700 | -3.96631100 | -4.55914300 |
| H | -2.457397 | -2.086018 | 3.655051  | C | 2.10860900 | -2.42993700 | -3.78735300 |
| C | 3.673399  | 1.874870  | 1.078817  | H | 1.48246800 | -1.57295900 | -4.11074000 |
| C | 3.296099  | -1.317956 | -3.589941 | H | 2.86074600 | -2.59117900 | -4.59233700 |
| C | 1.213789  | -1.138478 | -1.593343 | C | 2.52109300 | 3.49460300  | -1.60247300 |
| C | -2.976606 | 3.237754  | -2.597820 | C | 2.94481300 | 4.10445700  | -0.39030100 |
| H | -2.890602 | 2.245779  | -3.075872 | C | 2.37312600 | 5.34170100  | -0.03706000 |
| H | -2.270186 | 3.931729  | -3.098751 | H | 2.68335900 | 5.83205600  | 0.89757300  |
| H | -3.997967 | 3.629004  | -2.789332 | C | 1.41082600 | 5.95427400  | -0.85058800 |
| C | 0.874144  | 4.077373  | -1.787361 | H | 0.96563900 | 6.91408900  | -0.54885100 |
| H | 0.633861  | 4.352502  | -0.741782 | C | 0.99807500 | 5.33387100  | -2.03866400 |
| H | -0.029634 | 4.267109  | -2.401498 | H | 0.23079500 | 5.81676500  | -2.66203400 |
| H | 1.678536  | 4.753741  | -2.144650 | C | 1.54478800 | 4.10066300  | -2.44367400 |

### TS1

Sum of electronic and thermal Free Energies = -10995.797844

O 1

|    |             |             |             |   |             |             |             |
|----|-------------|-------------|-------------|---|-------------|-------------|-------------|
| Ga | 1.95401000  | 0.55870400  | -1.38757500 | H | 2.78195500  | 1.73100400  | 1.14448900  |
| Ga | 3.69397900  | -1.39948300 | 0.53154500  | H | 2.67344900  | 3.14897300  | 2.22405600  |
| B  | -0.86309400 | -0.02658400 | -0.41924700 | H | 4.15118400  | 2.11941100  | 2.22706100  |
| N  | 3.32997600  | -0.67673500 | -2.47303800 | C | 4.98786400  | 4.44736800  | 1.10660000  |
| N  | 3.07603100  | 2.23150500  | -1.99650500 | H | 5.43480100  | 5.11047700  | 0.33639300  |
| N  | 4.49428300  | -2.90155100 | -0.77190900 | H | 5.80565700  | 3.90180900  | 1.62076200  |
| N  | 5.41851600  | -1.50639700 | 1.70447300  | H | 4.50344300  | 5.09422100  | 1.86809000  |
| C  | 4.44317800  | -0.29122200 | -3.10543000 | C | 1.16135000  | 3.46428900  | -3.77826200 |
| C  | 4.86909200  | 1.05895700  | -3.16337200 | H | 1.25388700  | 2.36754800  | -3.64867900 |
| H  | 5.82195800  | 1.22885200  | -3.68198400 | C | 2.14488600  | 3.86323500  | -4.89967100 |
| C  | 4.25861000  | 2.21898200  | -2.64456100 | H | 1.81877700  | 3.43048200  | -5.86874200 |
| C  | 5.38258500  | -1.29400400 | -3.75194700 | H | 3.17137100  | 3.49972400  | -4.70478200 |
| H  | 4.84597500  | -2.04775900 | -4.35815500 | H | 2.18564200  | 4.96743500  | -5.01449300 |
| H  | 5.94916300  | -1.83267200 | -2.96335800 | C | -0.27876600 | 3.76378000  | -4.21915700 |
| H  | 6.11375900  | -0.78068300 | -4.40350600 | H | -0.40742000 | 4.82523300  | -4.52009100 |
| C  | 5.02488100  | 3.51941000  | -2.81065000 | H | -1.01383600 | 3.54672600  | -3.42415200 |
| H  | 5.80389900  | 3.42394100  | -3.58978100 | H | -0.54160800 | 3.13845400  | -5.09625900 |
| H  | 5.52649100  | 3.78403600  | -1.85557300 | C | 5.66380200  | -0.36916000 | 2.53749600  |
| H  | 4.35926500  | 4.36744900  | -3.05851900 | C | 4.84041400  | -0.10809100 | 3.66850900  |
| C  | 5.61276100  | -3.60088100 | -0.52286300 | C | 5.14350000  | 1.01777700  | 4.46180600  |
| C  | 6.39175900  | -3.47254700 | 0.65874800  | H | 4.52920200  | 1.23535100  | 5.34660600  |
| H  | 7.21182100  | -4.19651700 | 0.75776700  | C | 6.20183500  | 1.87608800  | 4.13797500  |
| C  | 6.33501800  | -2.49569500 | 1.67237500  | H | 6.41826000  | 2.74843900  | 4.77390800  |
| C  | 6.14989300  | -4.59613700 | -1.54257600 | C | 6.96330500  | 1.64098700  | 2.98420000  |
| H  | 6.42390800  | -4.07788400 | -2.48622300 | H | 7.77015400  | 2.33943900  | 2.71767600  |
| H  | 5.40900200  | -5.37490800 | -1.81006300 | C | 6.70544800  | 0.53038600  | 2.15945500  |
| H  | 7.05704700  | -5.09751500 | -1.15966200 | C | 3.65483800  | -1.01071700 | 4.00715600  |
| C  | 7.39793700  | -2.55401900 | 2.75455600  | H | 3.16829300  | -1.26472100 | 3.03375900  |
| H  | 8.18830700  | -1.79342300 | 2.58631000  | C | 4.09448900  | -2.34072100 | 4.64887600  |
| H  | 7.87968900  | -3.54969000 | 2.77848200  | H | 4.78695300  | -2.90011100 | 3.99046200  |
| H  | 6.96102400  | -2.33426800 | 3.74857300  | H | 3.21269900  | -2.98676900 | 4.83486700  |
| C  | 2.80977400  | -2.05112700 | -2.46454200 | H | 4.60623800  | -2.16060600 | 5.61810300  |
| H  | 1.99646100  | -2.00891100 | -1.71007900 | C | 2.58995700  | -0.30848300 | 4.86103900  |
| C  | 3.72711600  | -3.21640300 | -1.98935600 | H | 2.23845500  | 0.62936700  | 4.38482200  |
| H  | 4.42585300  | -3.46318200 | -2.81491400 | H | 2.96953800  | -0.06122600 | 5.87492700  |
| C  | 2.82616800  | -4.45890900 | -1.77256100 | H | 1.71498200  | -0.96884700 | 5.00601100  |
| H  | 3.44291700  | -5.30307300 | -1.40179800 | C | 7.46667100  | 0.32946600  | 0.84947300  |
|    |             |             |             | H | 7.58850200  | -0.76024300 | 0.68322600  |

|   |             |             |             |                                               |             |             |              |
|---|-------------|-------------|-------------|-----------------------------------------------|-------------|-------------|--------------|
| C | 8.87376500  | 0.94543400  | 0.84602700  | H                                             | -2.84836600 | -2.68453900 | 2.09150500   |
| H | 9.41160300  | 0.66487500  | -0.08288900 | C                                             | -2.03853300 | -4.65431200 | 2.40537200   |
| H | 9.47789600  | 0.59919300  | 1.71016500  | H                                             | -2.35786100 | -5.69461500 | 2.62732800   |
| H | 8.84110600  | 2.05497500  | 0.87782700  | H                                             | -1.40292100 | -4.33056600 | 3.25227600   |
| C | 6.63612000  | 0.85817300  | -0.33518100 | H                                             | -1.41036900 | -4.67464600 | 1.49266800   |
| H | 7.12221100  | 0.62375800  | -1.30380800 | C                                             | -4.05202700 | -3.68977600 | 3.56502100   |
| H | 6.51527500  | 1.95892200  | -0.27047500 | H                                             | -4.84232400 | -2.91635500 | 3.55827800   |
| H | 5.61905300  | 0.41529100  | -0.35994700 | H                                             | -3.37946900 | -3.46606300 | 4.41958300   |
| C | -0.46876700 | -0.85866100 | 0.89029200  | H                                             | -4.52713700 | -4.67555900 | 3.75589600   |
| C | -0.84528500 | -0.48694900 | 2.20031500  | C                                             | -4.84783200 | 2.45672500  | 1.33698400   |
| C | -0.50260100 | -1.20278400 | 3.35515100  | C                                             | -5.29537800 | 3.00615400  | 0.09934200   |
| C | 0.28425200  | -2.35873700 | 3.23837800  | C                                             | -5.12972900 | 4.38943300  | -0.10176600  |
| C | 0.68424100  | -2.78332800 | 1.96607700  | H                                             | -5.48270800 | 4.84749300  | -1.03605500  |
| C | 0.27344200  | -2.05511500 | 0.84114800  | C                                             | -4.48899400 | 5.19091100  | 0.85476400   |
| C | -1.21487400 | -0.82861300 | -1.75775400 | H                                             | -4.35995900 | 6.26795300  | 0.67009800   |
| C | -0.96851900 | -0.32037400 | -3.04912800 | C                                             | -3.96542400 | 4.61100400  | 2.01733000   |
| C | -1.26483000 | -1.00017700 | -4.23847900 | H                                             | -3.41457700 | 5.23818400  | 2.73508400   |
| C | -1.86904300 | -2.26430500 | -4.17024300 | C                                             | -4.13031300 | 3.23667700  | 2.28566400   |
| C | -2.13813800 | -2.82563900 | -2.91211400 | C                                             | -5.89961000 | 2.10979400  | -0.98861800  |
| C | -1.80701900 | -2.11212700 | -1.75006100 | H                                             | -5.28450200 | 1.17778600  | -0.98867300  |
| C | -1.07658800 | 1.55307800  | -0.32967100 | C                                             | -7.35722200 | 1.68270100  | -0.72076300  |
| C | -1.95025400 | 2.27707300  | -1.16993900 | H                                             | -7.45338200 | 1.03936200  | 0.17327100   |
| C | -2.09700700 | 3.67066800  | -1.11529700 | H                                             | -7.74647200 | 1.10292500  | -1.58390900  |
| C | -1.41369900 | 4.40795600  | -0.14015400 | H                                             | -8.01092800 | 2.57110100  | -0.58978600  |
| C | -0.55433400 | 3.73631000  | 0.73966200  | C                                             | -5.78615700 | 2.70809200  | -2.39890100  |
| C | -0.39299000 | 2.35146300  | 0.61474600  | H                                             | -6.46568900 | 3.57697700  | -2.53099700  |
| N | -5.16771100 | -1.81584100 | 1.12804100  | H                                             | -6.08100300 | 1.94886900  | -3.15223100  |
| N | -5.13519200 | 1.07959100  | 1.60760500  | C                                             | -3.57777400 | 2.62691900  | 3.57494300   |
| C | -6.28812300 | -1.72056300 | 1.87303500  | H                                             | -3.53782700 | 1.53010700  | 3.42070600   |
| C | -6.73289600 | -0.52968400 | 2.48168600  | C                                             | -2.15058700 | 3.10898900  | 3.89041900   |
| H | -7.65037400 | -0.61653900 | 3.07950800  | H                                             | -1.47356000 | 3.00091200  | 3.02597400   |
| C | -6.25531500 | 0.78733500  | 2.28868200  | H                                             | -1.72626600 | 2.51265400  | 4.72379300   |
| C | -7.18204300 | -2.93754400 | 2.02179900  | H                                             | -2.13439500 | 4.17448500  | 4.20283100   |
| H | -7.70300200 | -3.14341700 | 1.06320900  | C                                             | -4.48635700 | 2.89049500  | 4.79481500   |
| H | -7.94545600 | -2.77614900 | 2.80557700  | H                                             | -4.64186800 | 3.98051600  | 4.94382100   |
| H | -6.59966900 | -3.84945400 | 2.25554900  | H                                             | -4.01613400 | 2.48701300  | 5.71603100   |
| C | -7.16310800 | 1.89493400  | 2.79838400  | H                                             | -5.48009600 | 2.41662900  | 4.69430900   |
| H | -6.63339600 | 2.84868800  | 2.96163200  | Ga                                            | -3.83483600 | -0.26945100 | 0.59327700   |
| H | -7.66784800 | 1.58532600  | 3.73400500  | H                                             | -4.75523600 | 3.03421700  | -2.62565200  |
| H | -7.95363600 | 2.09121500  | 2.04368700  | F                                             | 0.48449100  | 1.78747800  | 1.46942700   |
| C | -4.94503700 | -3.05505200 | 0.44331400  | F                                             | 0.09148800  | 4.41690700  | 1.69955900   |
| C | -5.57590800 | -3.26199100 | -0.81335500 | F                                             | -1.56852700 | 5.73414800  | -0.06308500  |
| C | -5.41560500 | -4.50883100 | -1.44639500 | F                                             | -2.87023000 | 4.31645300  | -2.00677300  |
| H | -5.89709200 | -4.68996200 | -2.41960600 | F                                             | -2.70853800 | 1.64131100  | -2.09055800  |
| C | -4.63890400 | -5.51553300 | -0.86079800 | F                                             | -0.35851000 | 0.87510000  | -3.20491400  |
| H | -4.52684500 | -6.48881400 | -1.36340600 | F                                             | -0.94357600 | -0.46706500 | -5.42752500  |
| C | -3.95971700 | -5.26613900 | 0.33989700  | F                                             | -2.14933700 | -2.94697100 | -5.28779000  |
| H | -3.30735200 | -6.04722300 | 0.75489200  | F                                             | -2.68926900 | -4.04444800 | -2.84077400  |
| C | -4.08021300 | -4.03244100 | 1.00884000  | F                                             | -2.09636100 | -2.72509000 | -0.58702800  |
| C | -6.33686300 | -2.13178900 | -1.50316100 | F                                             | -1.64964300 | 0.57818000  | 2.40445400   |
| H | -6.61236500 | -1.38679800 | -0.72841000 | F                                             | -0.92467200 | -0.80015900 | 4.56396300   |
| C | -5.40587300 | -1.42020000 | -2.50852000 | F                                             | 0.62152100  | -3.06401600 | 4.33078600   |
| H | -5.05737200 | -2.12598900 | -3.29189600 | F                                             | 1.41354900  | -3.90406100 | 1.82621600   |
| H | -4.50122700 | -1.01329400 | -2.00640100 | F                                             | 0.60825800  | -2.59991000 | -0.34926600  |
| H | -5.92405600 | -0.57478900 | -3.00767200 |                                               |             |             |              |
| C | -7.63812400 | -2.59154800 | -2.18019400 |                                               |             |             |              |
| H | -7.44350900 | -3.26653700 | -3.04007900 |                                               |             |             |              |
| H | -8.19963800 | -1.71808500 | -2.57200100 |                                               |             |             |              |
| H | -8.29765900 | -3.13245700 | -1.47045100 |                                               |             |             |              |
| C | -3.24446300 | -3.71527700 | 2.25151400  |                                               |             |             |              |
|   |             |             |             | <b>Int1-Cl</b>                                |             |             |              |
|   |             |             |             | Sum of electronic and thermal Free Energies = |             |             | -9709.485285 |
|   |             |             |             | 0 1                                           |             |             |              |
|   |             |             |             | Ga                                            | -0.21460800 | -0.41455800 | -0.92921500  |
|   |             |             |             | Ga                                            | -2.44131100 | 0.73133000  | -0.05697800  |

|   |             |             |             |   |             |             |             |
|---|-------------|-------------|-------------|---|-------------|-------------|-------------|
| N | -0.93748000 | 0.66560700  | -2.52142100 | H | -3.38677600 | -5.35220200 | -0.85877800 |
| N | -0.71343100 | -2.16447900 | -1.81593800 | H | -4.13984200 | -4.52198000 | 0.54895200  |
| N | -2.92315800 | 2.38649300  | -1.20973500 | H | -2.90505600 | -5.78332600 | 0.81192700  |
| N | -4.26447800 | 0.62761800  | 0.80167900  | C | 1.89427900  | -2.75229100 | -2.85367800 |
| C | -1.73461900 | 0.19385900  | -3.48308700 | H | 1.68414500  | -1.72889900 | -2.47261200 |
| C | -2.05116000 | -1.17969600 | -3.60523100 | C | 1.40598700  | -2.80448100 | -4.31612100 |
| H | -2.72794500 | -1.43920900 | -4.42911400 | H | 2.00380100  | -2.10382700 | -4.93564500 |
| C | -1.54760300 | -2.26887900 | -2.87480800 | H | 0.34433800  | -2.51072100 | -4.42414600 |
| C | -2.43409300 | 1.07938600  | -4.50235500 | H | 1.53112800  | -3.82492900 | -4.73828400 |
| H | -1.84253400 | 1.96033000  | -4.80316000 | C | 3.41286800  | -2.92762700 | -2.79325500 |
| H | -3.40000900 | 1.43693000  | -4.08575600 | H | 3.75155200  | -3.85490800 | -3.30369200 |
| H | -2.66728200 | 0.49265800  | -5.41053700 | H | 3.76558700  | -2.96095500 | -1.74879600 |
| C | -1.96286400 | -3.64601500 | -3.35530000 | H | 3.91323000  | -2.07205800 | -3.28874000 |
| H | -2.59723400 | -3.56872500 | -4.25701100 | C | -4.60558400 | -0.58319200 | 1.49766100  |
| H | -2.52410900 | -4.18732600 | -2.56809500 | C | -4.12433800 | -0.82670500 | 2.81084900  |
| H | -1.07963100 | -4.27340000 | -3.58745100 | C | -4.57695900 | -1.98519300 | 3.47663800  |
| C | -4.16440800 | 2.90557900  | -1.23410000 | H | -4.22523000 | -2.18754100 | 4.49810600  |
| C | -5.17709100 | 2.59456300  | -0.29252200 | C | -5.44673200 | -2.88914000 | 2.85643300  |
| H | -6.08346500 | 3.21099500  | 0.64672700  | H | -5.78526900 | -3.78735700 | 3.39569900  |
| C | -5.24026200 | 1.55004600  | 0.64672700  | C | -5.86273700 | -2.66489400 | 1.53578100  |
| C | -4.58419700 | 3.87100000  | -2.33191500 | H | -6.52448100 | -3.39450700 | 1.04700400  |
| H | -4.48944300 | 3.38054900  | -3.32409400 | C | -5.45136500 | -1.51887700 | 0.83070900  |
| H | -3.96367300 | 4.78619500  | -2.37108200 | C | -3.16756500 | 0.13795600  | 3.50368200  |
| H | -5.63968100 | 4.17081700  | -2.20328000 | H | -2.49781400 | 0.55159300  | 2.71475600  |
| C | -6.51628000 | 1.42526700  | 1.45610200  | C | -3.93697300 | 1.30769100  | 4.15015600  |
| H | -7.18241000 | 0.64594100  | 1.03087400  | H | -4.49645800 | 1.90436200  | 3.40312700  |
| H | -7.06850200 | 2.38374900  | 1.46245200  | H | -3.24115400 | 1.99573900  | 4.67309800  |
| H | -6.30267300 | 1.11615300  | 2.49691700  | H | -4.66417800 | 0.92617100  | 4.89789300  |
| C | -0.66813700 | 2.08939300  | -2.31629300 | C | -2.25807000 | -0.54889400 | 4.53285800  |
| H | -0.12205400 | 2.14181500  | -1.34144600 | H | -1.73244100 | -1.41736400 | 4.09141300  |
| C | -1.92778400 | 2.97097100  | -2.13992000 | H | -2.82487600 | -0.88182900 | 5.42850600  |
| H | -2.40467400 | 3.09108500  | -3.13259500 | H | -1.47615300 | 0.15683200  | 4.87514200  |
| C | -1.44620800 | 4.36563300  | -1.69371500 | C | -5.86900100 | -1.29546500 | -0.62292900 |
| H | -2.30427100 | 5.02519800  | -1.45477100 | H | -6.03517200 | -0.20746900 | -0.76787500 |
| H | -0.87515000 | 4.25125200  | -0.75488000 | C | -7.17571500 | -2.00394400 | -1.01058900 |
| C | -0.53708000 | 5.00574300  | -2.74843300 | H | -7.48273800 | -1.70481100 | -2.03375200 |
| H | -0.22320300 | 6.01361400  | -2.40412400 | H | -8.00412000 | -1.75201800 | -0.31655600 |
| H | -1.10552900 | 5.15312200  | -3.69667600 | H | -7.06182100 | -3.10832500 | -1.01712900 |
| C | 0.69132700  | 4.12318500  | -2.99654300 | C | -4.72913000 | -1.69423600 | -1.57770400 |
| H | 1.29985400  | 4.10209600  | -2.07015000 | H | -4.97863500 | -1.44868700 | -2.63024600 |
| H | 1.33935000  | 4.55347100  | -3.78884800 | H | -4.52178100 | -2.78178700 | -1.51482800 |
| C | 0.30064600  | 2.68747900  | -3.35818100 | H | -3.78129700 | -1.16824700 | -1.33738900 |
| H | 1.19335800  | 2.03112000  | -3.38450800 | N | 2.11827700  | 2.05994000  | 1.37280100  |
| H | -0.16189600 | 2.66361500  | -4.36828400 | N | 3.53142800  | -0.53538900 | 1.28678900  |
| C | -0.10679900 | -3.39721500 | -1.39228200 | C | 2.80957400  | 2.15062300  | 2.53363000  |
| C | -0.81713500 | -4.28206400 | -0.54141600 | C | 3.56020200  | 1.10252600  | 3.09020800  |
| C | -0.27443100 | -5.56201600 | -0.32145900 | H | 4.01051800  | 1.31202100  | 4.06870100  |
| H | -0.81311800 | -6.27464900 | 0.32169000  | C | 4.00705600  | -0.07640800 | 2.45812100  |
| C | 0.94750400  | -5.93550800 | -0.89966600 | C | 2.88292600  | 3.47272300  | 3.28017200  |
| H | 1.35697000  | -6.94156300 | -0.71604200 | H | 3.55983100  | 4.17951300  | 2.76015600  |
| C | 1.66791400  | -5.02018600 | -1.68065500 | H | 3.27673500  | 3.30824900  | 4.30028100  |
| H | 2.64444800  | -5.30868400 | -2.09583600 | H | 1.90594700  | 3.98168900  | 3.34591800  |
| C | 1.15343500  | -3.73631300 | -1.95214200 | C | 5.10298300  | -0.82933700 | 3.18905600  |
| C | -2.11247600 | -3.84219900 | 0.12830400  | H | 4.65417700  | -1.66060000 | 3.77128700  |
| H | -2.51202100 | -2.99053800 | -0.45816000 | H | 5.62642400  | -0.16191200 | 3.89802300  |
| C | -1.83738400 | -3.30577600 | 1.54452000  | H | 5.84020800  | -1.28277300 | 2.50213600  |
| H | -1.10683900 | -2.47157200 | 1.54558200  | C | 1.68619400  | 3.33015000  | 0.86727900  |
| H | -1.42897700 | -4.10674100 | 2.19610000  | C | 2.61801500  | 4.11948000  | 0.13692300  |
| H | -2.77562200 | -2.93823900 | 1.99997700  | C | 2.30110300  | 5.47218900  | -0.10491000 |
| C | -3.19101200 | -4.93670900 | 0.15265600  | H | 3.01597600  | 6.10134000  | -0.65842200 |

|    |             |             |             |    |   |             |             |             |
|----|-------------|-------------|-------------|----|---|-------------|-------------|-------------|
| C  | 1.10832900  | 6.03117600  | 0.37015700  | O  | 1 |             |             |             |
| H  | 0.89154100  | 7.09818700  | 0.20389100  | Ga |   | 0.67429800  | -0.12417700 | -1.40103500 |
| C  | 0.17910200  | 5.22450900  | 1.04467700  | Ga |   | -2.46451700 | 0.31750000  | 0.07737100  |
| H  | -0.76753900 | 5.66846000  | 1.38496500  | N  |   | -0.91490900 | 0.58786400  | -2.44215200 |
| C  | 0.42852900  | 3.85719800  | 1.28278000  | N  |   | 0.51709600  | -2.02390500 | -2.01764000 |
| C  | 3.95958200  | 3.55428400  | -0.32914300 | N  |   | -3.44259000 | 1.77767900  | -1.23160300 |
| H  | 3.91132900  | 2.45765800  | -0.18602900 | N  |   | -4.41503300 | -0.29467400 | 0.70606200  |
| C  | 4.19599300  | 3.79675100  | -1.82974500 | C  |   | -1.52987000 | -0.13870200 | -3.38669400 |
| H  | 4.22867100  | 4.87821700  | -2.08261500 | C  |   | -1.22071200 | -1.49065700 | -3.65624500 |
| H  | 3.40922600  | 3.30703500  | -2.43340400 | H  |   | -1.80998900 | -1.94813400 | -4.46022900 |
| H  | 5.16688900  | 3.35390600  | -2.13322700 | C  |   | -0.32107300 | -2.36450000 | -3.02329000 |
| C  | 5.14355500  | 4.09006200  | 0.50035500  | C  |   | -2.68579900 | 0.40442400  | -4.20539200 |
| H  | 5.19061400  | 5.20021000  | 0.47850000  | H  |   | -2.47020100 | 1.38971400  | -4.65745400 |
| H  | 6.09996000  | 3.70417100  | 0.09051400  | H  |   | -3.58011500 | 0.51060200  | -3.55704600 |
| H  | 5.08927000  | 3.76748800  | 1.55826900  | H  |   | -2.93641400 | -0.30048500 | -5.01820100 |
| C  | -0.61632100 | 2.98464400  | 1.98504100  | C  |   | -0.33789800 | -3.79231300 | -3.53383300 |
| H  | -0.58628600 | 1.98980100  | 1.47510500  | H  |   | -0.77732500 | -3.82766400 | -4.54774600 |
| C  | -2.04378200 | 3.54890800  | 1.86516400  | H  |   | -0.95461500 | -4.43362500 | -2.87222700 |
| H  | -2.18719400 | 4.43261700  | 2.52191700  | H  |   | 0.67196500  | -4.23936200 | -3.55524300 |
| H  | -2.77903600 | 2.78816000  | 2.19176000  | C  |   | -4.76981600 | 1.95758600  | -1.33572000 |
| H  | -2.30639100 | 3.84048500  | 0.83243300  | C  |   | -5.72907800 | 1.37826900  | -0.46605000 |
| C  | -0.31924900 | 2.70409600  | 3.47209100  | H  |   | -6.75948400 | 1.73328100  | -0.60441100 |
| H  | 0.55945800  | 2.04967100  | 3.61039100  | C  |   | -5.58412800 | 0.32138200  | 0.45458300  |
| H  | -1.17992500 | 2.17311800  | 3.92260700  | C  |   | -5.36191900 | 2.79617600  | -2.46331600 |
| H  | -0.17996100 | 3.65321200  | 4.03215700  | H  |   | -5.10604900 | 2.34849200  | -3.44771400 |
| C  | 4.23504900  | -1.65035200 | 0.71038600  | H  |   | -4.98333700 | 3.83628600  | -2.48250800 |
| C  | 5.30459100  | -1.40039300 | -0.19512900 | H  |   | -6.46384500 | 2.82937900  | -2.38778800 |
| C  | 6.04736800  | -2.50031800 | -0.66761500 | C  |   | -6.85261200 | -0.18098100 | 1.12426100  |
| H  | 6.88192700  | -2.32479600 | -1.36369200 | H  |   | -7.23234300 | -1.09527000 | 0.62182200  |
| C  | 5.73768900  | -3.81030300 | -0.27567200 | H  |   | -7.64870100 | 0.58664100  | 1.08420600  |
| H  | 6.31811500  | -4.65782300 | -0.67329700 | H  |   | -6.66609900 | -0.46128900 | 2.17876700  |
| C  | 4.69392800  | -4.03575700 | 0.63140000  | C  |   | -1.13051000 | 2.03928200  | -2.27973800 |
| H  | 4.46899200  | -5.06253200 | 0.95956000  | H  |   | -0.61103700 | 2.29714800  | -1.32585500 |
| C  | 3.94911200  | -2.96593100 | 1.16826800  | C  |   | -2.58887200 | 2.56379200  | -2.12885000 |
| C  | 5.71868300  | 0.01962000  | -0.56962800 | H  |   | -3.03580500 | 2.57657400  | -3.14326200 |
| H  | 4.85220000  | 0.67232700  | -0.35045800 | C  |   | -2.47629700 | 4.04124800  | -1.69154500 |
| C  | 6.90394200  | 0.49647000  | 0.29382200  | H  |   | -3.47383700 | 4.43920200  | -1.41864000 |
| H  | 6.64713500  | 0.51969500  | 1.37109400  | H  |   | -1.86681800 | 4.08814100  | -0.77062600 |
| H  | 7.20737600  | 1.52383700  | 0.00125000  | C  |   | -1.82339300 | 4.89310700  | -2.78424200 |
| H  | 7.78658200  | -0.16710500 | 0.16887500  | H  |   | -1.75273500 | 5.95041800  | -2.45056400 |
| C  | 6.02814900  | 0.17458600  | -2.06622900 | H  |   | -2.46967600 | 4.88837900  | -3.69280700 |
| H  | 6.91016700  | -0.42370300 | -2.37973700 | C  |   | -0.43124900 | 4.34974000  | -3.12325100 |
| H  | 6.25197200  | 1.23632400  | -2.29958300 | H  |   | 0.23336600  | 4.53837300  | -2.25677300 |
| C  | 2.93025200  | -3.22608500 | 2.27277100  | H  |   | 0.01220400  | 4.89435300  | -3.98398000 |
| H  | 2.63886200  | -2.24978700 | 2.70841000  | C  |   | -0.44282600 | 2.84458700  | -3.41045800 |
| C  | 1.64726200  | -3.84406600 | 1.71556400  | H  |   | 0.58616900  | 2.45616600  | -3.53717700 |
| H  | 1.21232100  | -3.21014800 | 0.92171800  | H  |   | -0.97422100 | 2.64590900  | -4.36728600 |
| H  | 0.88594600  | -3.94816200 | 2.51352100  | C  |   | 1.26300000  | -3.11391400 | -1.43484500 |
| H  | 1.84214300  | -4.84376900 | 1.28204100  | C  |   | 0.56358100  | -4.00886900 | -0.57396100 |
| C  | 3.50342700  | -4.11028300 | 3.39751300  | C  |   | 1.25296400  | -5.12723500 | -0.06814400 |
| H  | 3.67043400  | -5.15361500 | 3.05480800  | H  |   | 0.72909200  | -5.82125900 | 0.60629600  |
| H  | 2.79042500  | -4.15501300 | 4.24705600  | C  |   | 2.58751300  | -5.36342000 | -0.40718800 |
| H  | 4.47307400  | -3.73085100 | 3.78138900  | H  |   | 3.11820700  | -6.23712100 | 0.00304800  |
| Ga | 1.76580700  | 0.22092900  | 0.56118100  | C  |   | 3.24799600  | -4.49550000 | -1.28566900 |
| H  | 5.15287900  | -0.12455800 | -2.67457000 | H  |   | 4.28687800  | -4.71428800 | -1.56144400 |
| Cl | 0.53467800  | -0.52986300 | 2.48647200  | C  |   | 2.60977400  | -3.36647400 | -1.84064600 |
| Cl | 2.63954500  | 0.68489500  | -1.70221700 | C  |   | -0.91209400 | -3.81958100 | -0.22428500 |
|    |             |             |             | H  |   | -1.34487700 | -3.11485100 | -0.96062100 |
|    |             |             |             | C  |   | -1.12160900 | -3.17358100 | 1.15178400  |
|    |             |             |             | H  |   | -0.60197900 | -2.20214600 | 1.24635000  |

**Int2-Cl**

Sum of electronic and thermal Free Energies = -9709.500207

|   |             |             |             |    |             |             |             |
|---|-------------|-------------|-------------|----|-------------|-------------|-------------|
| H | -0.75866600 | -3.83259900 | 1.96719900  | C  | 1.49917300  | 4.44781600  | 0.09582500  |
| H | -2.19883400 | -2.99199000 | 1.32039200  | C  | 0.94628600  | 5.70783400  | -0.21427500 |
| C | -1.70912000 | -5.13388000 | -0.31538900 | H  | 1.51338700  | 6.40398000  | -0.85233400 |
| H | -1.57390400 | -5.64618500 | -1.29128700 | C  | -0.29585200 | 6.09577700  | 0.30348400  |
| H | -2.78882000 | -4.92880100 | -0.17079600 | H  | -0.69842500 | 7.09676400  | 0.08296200  |
| H | -1.41285300 | -5.84906300 | 0.48022400  | C  | -1.04436300 | 5.19435500  | 1.07647400  |
| C | 3.35177400  | -2.50543300 | -2.87438100 | H  | -2.04079800 | 5.49160000  | 1.43406300  |
| H | 3.40184200  | -1.47755200 | -2.45321600 | C  | -0.55393400 | 3.91091800  | 1.39151900  |
| C | 2.65281000  | -2.38497400 | -4.24737500 | C  | 2.89458700  | 4.07574300  | -0.40736900 |
| H | 3.30010500  | -1.79690200 | -4.92942000 | H  | 3.05677600  | 3.00543200  | -0.16563900 |
| H | 1.68506900  | -1.85802400 | -4.20580200 | C  | 3.02595600  | 4.22415100  | -1.93257500 |
| H | 2.50400800  | -3.38505800 | -4.70749400 | H  | 2.86813300  | 5.27179800  | -2.26584400 |
| C | 4.78878600  | -2.98050800 | -3.14105300 | H  | 2.31135000  | 3.56688000  | -2.46130400 |
| H | 4.79769400  | -3.96283500 | -3.66107400 | H  | 4.04401300  | 3.92159600  | -2.25362900 |
| H | 5.38672100  | -3.07152400 | -2.21798000 | C  | 3.98870900  | 4.88916800  | 0.31501700  |
| H | 5.30285800  | -2.25390700 | -3.80262900 | H  | 3.80884300  | 5.98066200  | 0.21385800  |
| C | -4.45565000 | -1.57509700 | 1.33526800  | H  | 4.98491900  | 4.67060100  | -0.12012200 |
| C | -4.00470400 | -1.73998300 | 2.67425900  | H  | 4.04083100  | 4.64718400  | 1.39442600  |
| C | -4.08134000 | -3.02603500 | 3.24673000  | C  | -1.40833900 | 2.91576100  | 2.17988200  |
| H | -3.74361200 | -3.17597900 | 4.28205900  | H  | -1.16971800 | 1.90837500  | 1.76360100  |
| C | -4.56111800 | -4.12054800 | 2.51618200  | C  | -2.91690600 | 3.14921400  | 1.98463400  |
| H | -4.61052100 | -5.11640100 | 2.98343600  | H  | -3.26792900 | 4.05884700  | 2.51632700  |
| C | -4.95339800 | -3.95247100 | 1.17976900  | H  | -3.48498100 | 2.29484700  | 2.40116300  |
| H | -5.30523100 | -4.82379800 | 0.60800300  | H  | -3.19465600 | 3.23969300  | 0.91730100  |
| C | -4.90002500 | -2.68941400 | 0.56129200  | C  | -1.09059500 | 2.83526300  | 3.68605200  |
| C | -3.44365600 | -0.55911900 | 3.46297400  | H  | -0.08537700 | 2.41976300  | 3.88218800  |
| H | -2.82749900 | 0.03051400  | 2.74501400  | H  | -1.81599300 | 2.15412300  | 4.17587400  |
| C | -4.56229700 | 0.36058700  | 3.99089400  | H  | -1.18253000 | 3.83125800  | 4.17061800  |
| H | -5.16177000 | 0.79687800  | 3.16874400  | C  | 4.10286800  | -0.92126800 | 1.11443900  |
| H | -4.13385000 | 1.20091900  | 4.57634100  | C  | 5.01482200  | -0.66101200 | 0.05334000  |
| H | -5.24957500 | -0.20180700 | 4.65823800  | C  | 5.93817300  | -1.66848400 | -0.28292600 |
| C | -2.50793300 | -0.97970300 | 4.60413800  | H  | 6.67640100  | -1.47636300 | -1.07443800 |
| H | -1.71401200 | -1.66361600 | 4.24548700  | C  | 5.93677000  | -2.90728800 | 0.37468300  |
| H | -3.06040500 | -1.47417400 | 5.43183900  | H  | 6.66342100  | -3.68396700 | 0.08780900  |
| H | -2.00490100 | -0.08758200 | 5.02835800  | C  | 5.01151900  | -3.15427100 | 1.39422300  |
| C | -5.25835900 | -2.51233700 | -0.91577800 | H  | 5.01247200  | -4.12893500 | 1.90576800  |
| H | -5.75912700 | -1.52865500 | -1.02782900 | C  | 4.09883200  | -2.16373300 | 1.80657400  |
| C | -6.23033000 | -3.57614900 | -1.44822100 | C  | 5.06229300  | 0.70323700  | -0.63231200 |
| H | -6.54278900 | -3.32580900 | -2.48300700 | H  | 4.01394300  | 1.06200900  | -0.71355000 |
| H | -7.14370800 | -3.64995800 | -0.82236400 | C  | 5.85375200  | 1.73720600  | 0.19585500  |
| H | -5.76273400 | -4.58275400 | -1.48615400 | H  | 5.35286600  | 1.99209800  | 1.14903200  |
| C | -3.99052200 | -2.45219300 | -1.79088800 | H  | 5.96378400  | 2.67928800  | -0.37955500 |
| H | -4.24251900 | -2.19930500 | -2.84148100 | H  | 6.87409800  | 1.36315900  | 0.42608800  |
| H | -3.45861300 | -3.42452700 | -1.79115300 | C  | 5.62354300  | 0.64664100  | -2.06067100 |
| H | -3.27206400 | -1.68691300 | -1.42907600 | H  | 6.71401700  | 0.43372500  | -2.07086400 |
| N | 1.45219800  | 2.46817800  | 1.52944600  | H  | 5.47219600  | 1.62448300  | -2.56067400 |
| N | 3.28269000  | 0.16070800  | 1.59203400  | C  | 3.17658900  | -2.43455100 | 2.99179300  |
| C | 2.16167300  | 2.79441500  | 2.63708800  | H  | 2.71979000  | -1.47268400 | 3.29950500  |
| C | 3.13257600  | 1.96444500  | 3.22231300  | C  | 2.01865000  | -3.34873800 | 2.57538900  |
| H | 3.59742400  | 2.35367200  | 4.13666600  | H  | 1.49890500  | -2.94429400 | 1.69036200  |
| C | 3.74727600  | 0.82098000  | 2.66986600  | H  | 1.27561000  | -3.44003900 | 3.39384300  |
| C | 1.99078500  | 4.16243300  | 3.27347600  | H  | 2.38574300  | -4.36167900 | 2.31315900  |
| H | 2.39940100  | 4.95844000  | 2.61979500  | C  | 3.91663200  | -3.03186700 | 4.20410300  |
| H | 2.52274100  | 4.20044800  | 4.24167800  | H  | 4.27452700  | -4.06281300 | 3.99872700  |
| H | 0.92804300  | 4.41749000  | 3.43244100  | H  | 3.23286400  | -3.09092800 | 5.07618900  |
| C | 5.02610900  | 0.36803000  | 3.34586400  | H  | 4.80080700  | -2.43171800 | 4.50414600  |
| H | 4.84335500  | -0.54316200 | 3.94901100  | Ga | 1.40849400  | 0.54331300  | 0.91931300  |
| H | 5.40790900  | 1.15742600  | 4.01853200  | H  | 5.10831000  | -0.11819600 | -2.67174300 |
| H | 5.80965700  | 0.10558900  | 2.61049700  | Cl | 0.28464600  | -0.28786300 | 2.71042900  |
| C | 0.75870700  | 3.58208600  | 0.94497800  | Cl | 2.28787500  | 0.79759800  | -2.75773200 |

|                                                           |             |             |             |   |             |             |             |
|-----------------------------------------------------------|-------------|-------------|-------------|---|-------------|-------------|-------------|
| Int1-I                                                    |             |             |             | C | -2.26794500 | -3.68839300 | 1.41816100  |
| Sum of electronic and thermal Free Energies = -9384.95469 |             |             |             | H | -1.45487000 | -2.99237200 | 1.70205000  |
| O 1                                                       |             |             |             | H | -2.03760100 | -4.68587700 | 1.84982300  |
| Ga                                                        | -0.33338000 | -0.32684700 | -1.01662100 | H | -3.20490100 | -3.32100500 | 1.88030300  |
| Ga                                                        | -2.54726500 | 0.83567900  | -0.13508000 | C | -3.61123400 | -4.68707800 | -0.47189900 |
| N                                                         | -0.95878600 | 0.83977100  | -2.59077400 | H | -3.75320300 | -4.78903500 | -1.56828400 |
| N                                                         | -0.84154800 | -2.05670600 | -1.95819000 | H | -4.54732600 | -4.28109300 | -0.04004700 |
| N                                                         | -2.95055200 | 2.54207500  | -1.24024300 | H | -3.47313700 | -5.70943000 | -0.06170700 |
| N                                                         | -4.41601400 | 0.72795200  | 0.62982700  | C | 1.75309900  | -2.81577800 | -2.95566400 |
| C                                                         | -1.73372100 | 0.41357800  | -3.59092100 | H | 1.54556700  | -1.78736800 | -2.59149700 |
| C                                                         | -2.02905800 | -0.95331700 | -3.79809900 | C | 1.38699800  | -2.83665400 | -4.45331200 |
| H                                                         | -2.66547500 | -1.16976300 | -4.66510800 | H | 2.06830700  | -2.16106700 | -5.01113200 |
| C                                                         | -1.59034500 | -2.08275500 | -3.08701900 | H | 0.35419400  | -2.48689500 | -4.64463900 |
| C                                                         | -2.43742100 | 1.35154400  | -4.55742900 | H | 1.49445200  | -3.85858400 | -4.87729400 |
| H                                                         | -1.84020700 | 2.23771400  | -4.83027600 | C | 3.25570800  | -3.04313900 | -2.76674400 |
| H                                                         | -3.38758900 | 1.70329200  | -4.10116000 | H | 3.60400900  | -3.98842500 | -3.23578600 |
| H                                                         | -2.69933500 | 0.81076300  | -5.48573000 | H | 3.51935200  | -3.07150600 | -1.69506600 |
| C                                                         | -2.01000600 | -3.42204400 | -3.66349900 | H | 3.82250800  | -2.20867900 | -3.22610700 |
| H                                                         | -2.56918700 | -3.28057200 | -4.60605900 | C | -4.83458500 | -0.50725200 | 1.23953600  |
| H                                                         | -2.64912700 | -3.97314300 | -2.94687600 | C | -4.50686900 | -0.80006800 | 2.59050600  |
| H                                                         | -1.13777400 | -4.07605700 | -3.85570100 | C | -5.03818100 | -1.97933200 | 3.15392500  |
| C                                                         | -4.17328300 | 3.10332100  | -1.28458300 | H | -4.80386400 | -2.22847700 | 4.19797000  |
| C                                                         | -5.23768300 | 2.76484200  | -0.41473700 | C | -5.85578400 | -2.83959700 | 2.41175100  |
| H                                                         | -6.12830200 | 3.40197400  | -0.49641900 | H | -6.26184700 | -3.75108700 | 2.87706000  |
| C                                                         | -5.37191800 | 1.66862000  | 0.45488600  | C | -6.14121300 | -2.55050900 | 1.07003300  |
| C                                                         | -4.51363800 | 4.15219300  | -2.33259000 | H | -6.77690600 | -3.23763500 | 0.49360900  |
| H                                                         | -4.40137500 | 3.72319500  | -3.35109400 | C | -5.63529600 | -1.39001500 | 0.45553600  |
| H                                                         | -3.85819100 | 5.04267500  | -2.28980800 | C | -3.64176400 | 0.13883500  | 3.42778700  |
| H                                                         | -5.56105200 | 4.48514300  | -2.22108800 | H | -2.80586500 | 0.47330900  | 2.76940700  |
| C                                                         | -6.71036400 | 1.51411700  | 1.15243800  | C | -4.42271700 | 1.38427100  | 3.89529000  |
| H                                                         | -7.36084200 | 0.80270200  | 0.60202400  | H | -4.78044000 | 2.00505200  | 3.05222400  |
| H                                                         | -7.23408300 | 2.48737500  | 1.20207400  | H | -3.77670300 | 2.02750000  | 4.52784700  |
| H                                                         | -6.59530100 | 1.10520300  | 2.17299000  | H | -5.30342300 | 1.08728600  | 4.50365200  |
| C                                                         | -0.67209900 | 2.25201400  | -2.33276300 | C | -3.00104400 | -0.55181500 | 4.64007600  |
| H                                                         | -0.09752900 | 2.25441000  | -1.37339600 | H | -2.47748500 | -1.48389900 | 4.35092600  |
| C                                                         | -1.91038100 | 3.15079600  | -2.09980600 | H | -3.75418600 | -0.78960700 | 5.42189200  |
| H                                                         | -2.35934800 | 3.35882800  | -3.09144700 | H | -2.24497100 | 0.11692700  | 5.09760200  |
| C                                                         | -1.39186500 | 4.49128000  | -1.53888800 | C | -5.93469000 | -1.07904000 | -1.01212000 |
| H                                                         | -2.23363000 | 5.15250600  | -1.25074700 | H | -6.11245000 | 0.01367000  | -1.09743200 |
| H                                                         | -0.83442700 | 4.28196900  | -0.60835500 | C | -7.19195300 | -1.77848900 | -1.55051000 |
| C                                                         | -0.45550300 | 5.19423700  | -2.52770100 | H | -7.41694500 | -1.42032500 | -2.57599700 |
| H                                                         | -0.09661000 | 6.14635100  | -2.08334500 | H | -8.08030300 | -1.58041600 | -0.91580900 |
| H                                                         | -1.01851300 | 5.46272700  | -3.45211700 | H | -7.05729100 | -2.87872400 | -1.61404200 |
| C                                                         | 0.72941800  | 4.28725400  | -2.87982900 | C | -4.72189300 | -1.39120300 | -1.90554400 |
| H                                                         | 1.35194100  | 4.14529300  | -1.97188000 | H | -4.89375800 | -1.05827400 | -2.94908600 |
| H                                                         | 1.38249900  | 4.76292900  | -3.64143100 | H | -4.50490300 | -2.47715000 | -1.91972900 |
| C                                                         | 0.26038000  | 2.91527200  | -3.37081000 | H | -3.79941700 | -0.88377100 | -1.55217700 |
| H                                                         | 1.12269000  | 2.23916900  | -3.53071500 | N | 1.98823000  | 1.96188300  | 1.48697300  |
| H                                                         | -0.26168100 | 3.02687100  | -4.34503600 | N | 3.33261400  | -0.69235700 | 1.38104400  |
| C                                                         | -0.33212800 | -3.34694600 | -1.55823100 | C | 2.59816200  | 1.96700200  | 2.69754200  |
| C                                                         | -1.12354500 | -4.21935500 | -0.76692400 | C | 3.24306500  | 0.85487300  | 3.26247600  |
| C                                                         | -0.67896700 | -5.54604200 | -0.59815800 | H | 3.60177100  | 0.99214800  | 4.29043000  |
| H                                                         | -1.28280800 | -6.24144500 | 0.00558800  | C | 3.69169700  | -0.31897500 | 2.62267100  |
| C                                                         | 0.51233600  | -5.99285200 | -1.18275900 | C | 2.68852500  | 3.25067700  | 3.50752600  |
| H                                                         | 0.83617500  | -7.03670500 | -1.04494300 | H | 3.44286000  | 3.93242000  | 3.06730600  |
| C                                                         | 1.30968600  | -5.10119300 | -1.91397000 | H | 2.99836600  | 3.01992100  | 4.54353300  |
| H                                                         | 2.26318600  | -5.44501400 | -2.34113600 | H | 1.74275200  | 3.81778600  | 3.52948400  |
| C                                                         | 0.90682100  | -3.76749600 | -2.11903800 | C | 4.63086400  | -1.17408500 | 3.45170300  |
| C                                                         | -2.42495300 | -3.77306100 | -0.11009100 | H | 4.01655900  | -1.84929800 | 4.08431900  |
| H                                                         | -2.65143800 | -2.75058500 | -0.47700400 | H | 5.23734900  | -0.54473200 | 4.12951600  |



|    |             |             |             |
|----|-------------|-------------|-------------|
| H  | 5.29988500  | -1.80465200 | 2.84106200  |
| C  | 1.60028400  | 3.27383800  | 1.04269600  |
| C  | 2.57336400  | 4.08234500  | 0.38946700  |
| C  | 2.29187400  | 5.45282700  | 0.21291200  |
| H  | 3.03494600  | 6.09359400  | -0.28575800 |
| C  | 1.09926100  | 6.01409900  | 0.68608600  |
| H  | 0.91124900  | 7.09325700  | 0.57082200  |
| C  | 0.13654700  | 5.19597000  | 1.29404500  |
| H  | -0.80874800 | 5.64211700  | 1.63557000  |
| C  | 0.34737900  | 3.81154300  | 1.46151200  |
| C  | 3.91728500  | 3.51388800  | -0.06380900 |
| H  | 3.77499900  | 2.42041200  | -0.17000800 |
| C  | 4.34054300  | 4.04360700  | -1.44379400 |
| H  | 4.61448500  | 5.12030200  | -1.41625100 |
| H  | 3.53885800  | 3.90117600  | -2.19378700 |
| H  | 5.22821700  | 3.48335400  | -1.80163400 |
| C  | 5.04873400  | 3.73617700  | 0.96078400  |
| H  | 5.13155700  | 4.80509100  | 1.25419600  |
| H  | 6.01984500  | 3.43398200  | 0.51682700  |
| H  | 4.90972900  | 3.12856900  | 1.87538600  |
| C  | -0.73917700 | 2.94155800  | 2.09913200  |
| H  | -0.68686300 | 1.94664000  | 1.59361300  |
| C  | -2.15551000 | 3.51249400  | 1.90156700  |
| H  | -2.34082500 | 4.38168700  | 2.56708200  |
| H  | -2.90929600 | 2.74629700  | 2.16733600  |
| H  | -2.35333800 | 3.82778100  | 0.86227400  |
| C  | -0.53805700 | 2.66565700  | 3.60285500  |
| H  | 0.34332100  | 2.03265900  | 3.80759300  |
| H  | -1.41461600 | 2.11155600  | 3.99386100  |
| H  | -0.45413700 | 3.61843700  | 4.16864300  |
| C  | 4.07356200  | -1.77470200 | 0.78209300  |
| C  | 5.22261300  | -1.46477500 | -0.00249600 |
| C  | 5.95637200  | -2.53127200 | -0.55818000 |
| H  | 6.83998200  | -2.31013300 | -1.17493700 |
| C  | 5.59107500  | -3.86539800 | -0.32997700 |
| H  | 6.17131800  | -4.68279700 | -0.78637800 |
| C  | 4.49817500  | -4.15276900 | 0.49603900  |
| H  | 4.23525400  | -5.20039800 | 0.71053300  |
| C  | 3.73780200  | -3.12288100 | 1.08751000  |
| C  | 5.74506600  | -0.03491500 | -0.12706600 |
| H  | 4.86938400  | 0.63834300  | -0.03785100 |
| C  | 6.71081400  | 0.29728700  | 1.03047800  |
| H  | 6.20662100  | 0.27418600  | 2.01463900  |
| H  | 7.13351000  | 1.31517300  | 0.89888300  |
| H  | 7.55670300  | -0.42226500 | 1.06193500  |
| C  | 6.42236000  | 0.25247000  | -1.47540700 |
| H  | 7.39477400  | -0.27614100 | -1.57277500 |
| H  | 6.63163000  | 1.33834200  | -1.56923100 |
| C  | 2.66580500  | -3.47948400 | 2.11003700  |
| H  | 2.31797800  | -2.53937400 | 2.58252000  |
| C  | 1.43806100  | -4.11211500 | 1.45388600  |
| H  | 1.01910800  | -3.45320800 | 0.67202300  |
| H  | 0.64019900  | -4.28859300 | 2.20272300  |
| H  | 1.69303900  | -5.08000500 | 0.98000400  |
| C  | 3.21130500  | -4.40410100 | 3.21659100  |
| H  | 3.42849300  | -5.42169500 | 2.82773800  |
| H  | 2.45642200  | -4.51470700 | 4.02297200  |
| H  | 4.14621000  | -4.01678400 | 3.66956300  |
| Ga | 1.64685900  | 0.16909400  | 0.55263200  |
| H  | 5.77084800  | -0.03951500 | -2.32218100 |

|   |            |             |             |
|---|------------|-------------|-------------|
| I | 0.04211600 | -0.81935200 | 2.66941300  |
| I | 2.81257400 | 0.65683600  | -2.04455000 |

#### Int2-I

Sum of electronic and thermal Free Energies = -9384.966977

|     |             |             |             |
|-----|-------------|-------------|-------------|
| O 1 |             |             |             |
| Ga  | 0.59872900  | -0.09234200 | -1.37101300 |
| Ga  | -2.65488000 | 0.46832300  | -0.00121100 |
| N   | -0.88851800 | 0.83363400  | -2.41387700 |
| N   | 0.35255300  | -1.93090600 | -2.15450500 |
| N   | -3.44819900 | 2.06727400  | -1.25086700 |
| N   | -4.68990900 | -0.07859800 | 0.40588700  |
| C   | -1.48243800 | 0.22847600  | -3.45387000 |
| C   | -1.21730200 | -1.10321500 | -3.84542900 |
| H   | -1.77366700 | -1.43885800 | -4.72897200 |
| C   | -0.42648800 | -2.10005600 | -3.24982600 |
| C   | -2.57434300 | 0.90016500  | -4.26484700 |
| H   | -2.29278500 | 1.90768800  | -4.62103000 |
| H   | -3.48660700 | 0.99747600  | -3.64084700 |
| H   | -2.82696600 | 0.28155300  | -5.14432000 |
| C   | -0.51350400 | -3.46483000 | -3.90826900 |
| H   | -0.85449600 | -3.35743400 | -4.95463700 |
| H   | -1.24559200 | -4.10602100 | -3.37611600 |
| H   | 0.45068500  | -4.00257200 | -3.88981800 |
| C   | -4.74890000 | 2.35204100  | -1.43764600 |
| C   | -5.81021600 | 1.76743000  | -0.70350900 |
| H   | -6.80311100 | 2.19967800  | -0.88772100 |
| C   | -5.80034200 | 0.62488800  | 0.12009100  |
| C   | -5.19262200 | 3.32781900  | -2.52237000 |
| H   | -4.89631900 | 2.94797600  | -3.52383000 |
| H   | -4.74209600 | 4.33383600  | -2.42071200 |
| H   | -6.29206800 | 3.43829800  | -2.51960000 |
| C   | -7.14782500 | 0.14258300  | 0.63232000  |
| H   | -7.53432900 | -0.69162600 | 0.01009300  |
| H   | -7.89231700 | 0.96094000  | 0.60577700  |
| H   | -7.07045500 | -0.24906000 | 1.66431400  |
| C   | -1.04850100 | 2.27984100  | -2.13915800 |
| H   | -0.55051600 | 2.43598200  | -1.15328700 |
| C   | -2.48540900 | 2.87151700  | -2.00774400 |
| H   | -2.86334900 | 3.00959400  | -3.04051400 |
| C   | -2.32065300 | 4.29357000  | -1.42253300 |
| H   | -3.30880000 | 4.70811800  | -1.14037100 |
| H   | -1.73891900 | 4.22479100  | -0.48480000 |
| C   | -1.59505900 | 5.21178400  | -2.40908900 |
| H   | -1.47735700 | 6.22644500  | -1.97225600 |
| H   | -2.21403300 | 5.32993200  | -3.32886000 |
| C   | -0.22594800 | 4.62356200  | -2.76409000 |
| H   | 0.42241100  | 4.69925000  | -1.86855300 |
| H   | 0.26928200  | 5.21519900  | -3.56337400 |
| C   | -0.30306600 | 3.15193700  | -3.18276600 |
| H   | 0.71315500  | 2.74077500  | -3.32965500 |
| H   | -0.82081000 | 3.06425200  | -4.16272100 |
| C   | 0.94063900  | -3.14704000 | -1.63304400 |
| C   | 0.08070400  | -4.06257200 | -0.95773300 |
| C   | 0.60449700  | -5.30499600 | -0.55378300 |
| H   | -0.04680400 | -6.01617700 | -0.02475700 |
| C   | 1.93711200  | -5.64237900 | -0.80570800 |
| H   | 2.33569200  | -6.61437800 | -0.47446400 |
| C   | 2.76319900  | -4.74478700 | -1.49186400 |
| H   | 3.80124300  | -5.03208200 | -1.70279600 |

|   |             |             |             |   |             |             |             |
|---|-------------|-------------|-------------|---|-------------|-------------|-------------|
| C | 2.28910000  | -3.49623300 | -1.94742100 | C | 4.68048300  | -0.32118900 | 3.69162700  |
| C | -1.38838600 | -3.75068700 | -0.68475100 | H | 4.29168300  | -1.21132700 | 4.22739900  |
| H | -1.70857700 | -2.97149200 | -1.40333400 | H | 5.08272200  | 0.38283800  | 4.44250700  |
| C | -1.59304300 | -3.14910900 | 0.71096800  | H | 5.50412400  | -0.67421000 | 3.04470800  |
| H | -0.99684200 | -2.22858300 | 0.85239700  | C | 0.87164000  | 3.44336700  | 1.20706300  |
| H | -1.29795600 | -3.86200300 | 1.50796600  | C | 1.68684700  | 4.31481800  | 0.43226800  |
| H | -2.65542600 | -2.88291500 | 0.86672900  | C | 1.23515300  | 5.63378600  | 0.22019600  |
| C | -2.30358500 | -4.96971200 | -0.88983700 | H | 1.86146100  | 6.33150500  | -0.35583000 |
| H | -2.15258200 | -5.44852600 | -1.88051600 | C | 0.01327800  | 6.07343300  | 0.74616300  |
| H | -3.36376000 | -4.66030000 | -0.80424400 | H | -0.30902200 | 7.11599000  | 0.59823400  |
| H | -2.13888900 | -5.74551900 | -0.11326600 | C | -0.81516500 | 5.17262200  | 1.42994600  |
| C | 3.19549700  | -2.61417400 | -2.81054200 | H | -1.79614600 | 5.51114700  | 1.79463900  |
| H | 3.23227900  | -1.61665000 | -2.32211700 | C | -0.42274700 | 3.83718700  | 1.65620600  |
| C | 2.67411200  | -2.39547400 | -4.24787200 | C | 3.04497000  | 3.86786800  | -0.10907100 |
| H | 3.41522200  | -1.79748700 | -4.81636700 | H | 3.00434000  | 2.76252400  | -0.21269500 |
| H | 1.72316800  | -1.83657700 | -4.29290900 | C | 3.34637600  | 4.44233500  | -1.50300600 |
| H | 2.54924900  | -3.36680700 | -4.77275600 | H | 3.53266500  | 5.53713600  | -1.47121400 |
| C | 4.63868500  | -3.12560300 | -2.91564000 | H | 2.52411800  | 4.24577400  | -2.21634500 |
| H | 4.69945700  | -4.05221800 | -3.52670600 | H | 4.25788600  | 3.96248300  | -1.91336100 |
| H | 5.08574100  | -3.32693400 | -1.92737400 | C | 4.20308000  | 4.20914300  | 0.85157600  |
| H | 5.26486300  | -2.35948700 | -3.41687300 | H | 4.18673900  | 5.28585300  | 1.12587800  |
| C | -4.86212800 | -1.40412200 | 0.90565800  | H | 5.17517400  | 4.00434500  | 0.35953800  |
| C | -4.56617600 | -1.71337400 | 2.26269800  | H | 4.17377900  | 3.60820900  | 1.77991700  |
| C | -4.75704100 | -3.04258700 | 2.69311700  | C | -1.36104300 | 2.87263300  | 2.38263700  |
| H | -4.53690300 | -3.30976100 | 3.73607300  | H | -1.13508800 | 1.85569100  | 1.99148600  |
| C | -5.21477000 | -4.03472100 | 1.81641400  | C | -2.84722500 | 3.14999300  | 2.09439400  |
| H | -5.35774800 | -5.06512300 | 2.17740300  | H | -3.20493000 | 4.07685900  | 2.59095300  |
| C | -5.47474100 | -3.71932000 | 0.47488700  | H | -3.46239400 | 2.31801700  | 2.49088600  |
| H | -5.82269700 | -4.50949800 | -0.20642400 | H | -3.06224100 | 3.23367300  | 1.01209900  |
| C | -5.29489800 | -2.41041900 | -0.00984100 | C | -1.14428500 | 2.81106900  | 3.90741100  |
| C | -4.04112200 | -0.64081800 | 3.21656200  | H | -0.16342900 | 2.37859600  | 4.17741400  |
| H | -3.23609400 | -0.10217200 | 2.66182700  | H | -1.91312000 | 2.15303800  | 4.36233300  |
| C | -5.11658200 | 0.39476500  | 3.60213300  | H | -1.23983800 | 3.81934900  | 4.36583900  |
| H | -5.48592300 | 0.96048900  | 2.72658700  | C | 3.96910300  | -1.29276400 | 1.22512000  |
| H | -4.69982000 | 1.12957100  | 4.32237700  | C | 5.04131300  | -0.97438800 | 0.34212400  |
| H | -5.98357300 | -0.09978900 | 4.08992800  | C | 5.93916600  | -1.99905400 | -0.01157200 |
| C | -3.39858800 | -1.21766200 | 4.48481300  | H | 6.78452000  | -1.76605400 | -0.67482800 |
| H | -2.63415700 | -1.98367500 | 4.24681800  | C | 5.77751700  | -3.30818300 | 0.46326500  |
| H | -4.15614900 | -1.67388700 | 5.15803300  | H | 6.48838500  | -4.09548100 | 0.16629700  |
| H | -2.89356700 | -0.41010300 | 5.05256800  | C | 4.71232700  | -3.60705100 | 1.31736300  |
| C | -5.52054900 | -2.07138500 | -1.48555400 | H | 4.58963900  | -4.63247100 | 1.69802100  |
| H | -5.96990400 | -1.05829200 | -1.53426600 | C | 3.81275600  | -2.60857200 | 1.74184100  |
| C | -6.49046100 | -3.02726000 | -2.19665200 | C | 5.30753300  | 0.45698900  | -0.11655200 |
| H | -6.70607500 | -2.66111400 | -3.22160200 | H | 4.32191700  | 0.96090800  | -0.20837500 |
| H | -7.45436600 | -3.11553200 | -1.65405500 | C | 6.14557800  | 1.22924600  | 0.92541000  |
| H | -6.06472700 | -4.04770400 | -2.30057100 | H | 5.58742000  | 1.41826800  | 1.86169100  |
| C | -4.18855900 | -1.98532000 | -2.25669400 | H | 6.45097000  | 2.21482200  | 0.51882400  |
| H | -4.34993600 | -1.60306900 | -3.28563800 | H | 7.07018200  | 0.66803700  | 1.17846100  |
| H | -3.70570900 | -2.97940500 | -2.33490700 | C | 5.99900500  | 0.52902000  | -1.48725600 |
| H | -3.46375600 | -1.30646700 | -1.76012700 | H | 7.06447600  | 0.21985100  | -1.42805800 |
| N | 1.47755500  | 2.24511600  | 1.72993000  | H | 5.97967100  | 1.57154400  | -1.86551300 |
| N | 3.15422500  | -0.21330000 | 1.73368400  | C | 2.75576400  | -2.96048000 | 2.77944400  |
| C | 2.15509700  | 2.44267100  | 2.88651400  | H | 2.32527500  | -2.01385400 | 3.16338900  |
| C | 2.99834000  | 1.48433900  | 3.47953100  | C | 1.60503700  | -3.73976300 | 2.13504700  |
| H | 3.41119200  | 1.76562300  | 4.45618100  | H | 1.18916300  | -3.19199800 | 1.27014000  |
| C | 3.55699800  | 0.32370200  | 2.90436000  | H | 0.78115500  | -3.89978600 | 2.86009400  |
| C | 2.08957800  | 3.78684000  | 3.58974400  | H | 1.95217500  | -4.72548100 | 1.76644500  |
| H | 2.62379300  | 4.56104000  | 3.00427000  | C | 3.32656200  | -3.74112500 | 3.97841200  |
| H | 2.56334100  | 3.71751700  | 4.58599400  | H | 3.63549300  | -4.76894800 | 3.69313000  |
| H | 1.05425600  | 4.15295800  | 3.70395400  | H | 2.55275600  | -3.83871000 | 4.76790300  |

|    |             |             |             |
|----|-------------|-------------|-------------|
| H  | 4.21185400  | -3.24321900 | 4.42573900  |
| Ga | 1.32112000  | 0.34440400  | 1.02996000  |
| H  | 5.48931900  | -0.10688800 | -2.23682600 |
| I  | -0.11398900 | -0.61172500 | 3.04221600  |
| I  | 2.62400100  | 0.99194600  | -2.74192300 |
